# Supplementary material for: Targeting the BAG2/CHIP axis promotes gastric cancer apoptosis by blocking apoptosome assembly
Source: Frontiers journal article supplement (doi:10.3389/fimmu.2025.1578416), 2025-07-18
Supplement: Data_Sheet_9.zip [file Data_Sheet_9.zip]

## Sheet: RawData
NanoTemper Technologies	NanoTemper Technologies
MO.Affinity Analysis v2.2.6	MO.Affinity Analysis v2.2.6
Origin of exported data	Origin of exported data
Project Title:
Comment:
Project File Path:
Analysis-Set Name:	Analysis-Set #1
Exported from:	MST Traces
Exported on:	2023-04-19 18:28:41
Analysis Settings	Analysis Settings
Type of Analysis:	MST
Evaluation strategy:	Manual
Cold Region Start:	-1
Cold Region End:	0
Hot Region Start:	1.56
Hot Region End:	2.56
Sample Information	Sample Information		Sample Information	Sample Information		Sample Information	Sample Information		Sample Information	Sample Information		Sample Information	Sample Information		Sample Information	Sample Information		Sample Information	Sample Information		Sample Information	Sample Information		Sample Information	Sample Information		Sample Information	Sample Information		Sample Information	Sample Information		Sample Information	Sample Information		Sample Information	Sample Information		Sample Information	Sample Information		Sample Information	Sample Information		Sample Information	Sample Information
Merge-Set Name:	MyLigand Tray		Merge-Set Name:	MyLigand Tray		Merge-Set Name:	MyLigand Tray		Merge-Set Name:	MyLigand Tray		Merge-Set Name:	MyLigand Tray		Merge-Set Name:	MyLigand Tray		Merge-Set Name:	MyLigand Tray		Merge-Set Name:	MyLigand Tray		Merge-Set Name:	MyLigand Tray		Merge-Set Name:	MyLigand Tray		Merge-Set Name:	MyLigand Tray		Merge-Set Name:	MyLigand Tray		Merge-Set Name:	MyLigand Tray		Merge-Set Name:	MyLigand Tray		Merge-Set Name:	MyLigand Tray		Merge-Set Name:	MyLigand Tray
Run Name:	Experiment #11		Run Name:	Experiment #11		Run Name:	Experiment #11		Run Name:	Experiment #11		Run Name:	Experiment #11		Run Name:	Experiment #11		Run Name:	Experiment #11		Run Name:	Experiment #11		Run Name:	Experiment #11		Run Name:	Experiment #11		Run Name:	Experiment #11		Run Name:	Experiment #11		Run Name:	Experiment #11		Run Name:	Experiment #11		Run Name:	Experiment #11		Run Name:	Experiment #11
Date of Measurement:	2023-04-19 16:39:58		Date of Measurement:	2023-04-19 16:40:38		Date of Measurement:	2023-04-19 16:41:19		Date of Measurement:	2023-04-19 16:42:00		Date of Measurement:	2023-04-19 16:42:40		Date of Measurement:	2023-04-19 16:43:21		Date of Measurement:	2023-04-19 16:44:02		Date of Measurement:	2023-04-19 16:44:42		Date of Measurement:	2023-04-19 16:45:23		Date of Measurement:	2023-04-19 16:46:04		Date of Measurement:	2023-04-19 16:46:44		Date of Measurement:	2023-04-19 16:47:25		Date of Measurement:	2023-04-19 16:48:06		Date of Measurement:	2023-04-19 16:48:47		Date of Measurement:	2023-04-19 16:49:27		Date of Measurement:	2023-04-19 16:50:08
Capillary Type:	Monolith NT.115 Standard Treated Capillary		Capillary Type:	Monolith NT.115 Standard Treated Capillary		Capillary Type:	Monolith NT.115 Standard Treated Capillary		Capillary Type:	Monolith NT.115 Standard Treated Capillary		Capillary Type:	Monolith NT.115 Standard Treated Capillary		Capillary Type:	Monolith NT.115 Standard Treated Capillary		Capillary Type:	Monolith NT.115 Standard Treated Capillary		Capillary Type:	Monolith NT.115 Standard Treated Capillary		Capillary Type:	Monolith NT.115 Standard Treated Capillary		Capillary Type:	Monolith NT.115 Standard Treated Capillary		Capillary Type:	Monolith NT.115 Standard Treated Capillary		Capillary Type:	Monolith NT.115 Standard Treated Capillary		Capillary Type:	Monolith NT.115 Standard Treated Capillary		Capillary Type:	Monolith NT.115 Standard Treated Capillary		Capillary Type:	Monolith NT.115 Standard Treated Capillary		Capillary Type:	Monolith NT.115 Standard Treated Capillary
Capillary Position:	1		Capillary Position:	2		Capillary Position:	3		Capillary Position:	4		Capillary Position:	5		Capillary Position:	6		Capillary Position:	7		Capillary Position:	8		Capillary Position:	9		Capillary Position:	10		Capillary Position:	11		Capillary Position:	12		Capillary Position:	13		Capillary Position:	14		Capillary Position:	15		Capillary Position:	16
Ligand:	MyLigand		Ligand:	MyLigand		Ligand:	MyLigand		Ligand:	MyLigand		Ligand:	MyLigand		Ligand:	MyLigand		Ligand:	MyLigand		Ligand:	MyLigand		Ligand:	MyLigand		Ligand:	MyLigand		Ligand:	MyLigand		Ligand:	MyLigand		Ligand:	MyLigand		Ligand:	MyLigand		Ligand:	MyLigand		Ligand:	MyLigand
Ligand Concentration:	5e-05		Ligand Concentration:	2.5e-05		Ligand Concentration:	1.25e-05		Ligand Concentration:	6.25e-06		Ligand Concentration:	3.125e-06		Ligand Concentration:	1.5625e-06		Ligand Concentration:	7.8125e-07		Ligand Concentration:	3.90625e-07		Ligand Concentration:	1.95313e-07		Ligand Concentration:	9.76563e-08		Ligand Concentration:	4.88281e-08		Ligand Concentration:	2.44141e-08		Ligand Concentration:	1.2207e-08		Ligand Concentration:	6.10352e-09		Ligand Concentration:	3.05176e-09		Ligand Concentration:	1.52588e-09
Target:	chip		Target:	chip		Target:	chip		Target:	chip		Target:	chip		Target:	chip		Target:	chip		Target:	chip		Target:	chip		Target:	chip		Target:	chip		Target:	chip		Target:	chip		Target:	chip		Target:	chip		Target:	chip
TargetConcentration:	5e-07		TargetConcentration:	5e-07		TargetConcentration:	5e-07		TargetConcentration:	5e-07		TargetConcentration:	5e-07		TargetConcentration:	5e-07		TargetConcentration:	5e-07		TargetConcentration:	5e-07		TargetConcentration:	5e-07		TargetConcentration:	5e-07		TargetConcentration:	5e-07		TargetConcentration:	5e-07		TargetConcentration:	5e-07		TargetConcentration:	5e-07		TargetConcentration:	5e-07		TargetConcentration:	5e-07
Measurement Settings	Measurement Settings		Measurement Settings	Measurement Settings		Measurement Settings	Measurement Settings		Measurement Settings	Measurement Settings		Measurement Settings	Measurement Settings		Measurement Settings	Measurement Settings		Measurement Settings	Measurement Settings		Measurement Settings	Measurement Settings		Measurement Settings	Measurement Settings		Measurement Settings	Measurement Settings		Measurement Settings	Measurement Settings		Measurement Settings	Measurement Settings		Measurement Settings	Measurement Settings		Measurement Settings	Measurement Settings		Measurement Settings	Measurement Settings		Measurement Settings	Measurement Settings
MST-Power:	Medium		MST-Power:	Medium		MST-Power:	Medium		MST-Power:	Medium		MST-Power:	Medium		MST-Power:	Medium		MST-Power:	Medium		MST-Power:	Medium		MST-Power:	Medium		MST-Power:	Medium		MST-Power:	Medium		MST-Power:	Medium		MST-Power:	Medium		MST-Power:	Medium		MST-Power:	Medium		MST-Power:	Medium
Excitation-Power:	100		Excitation-Power:	100		Excitation-Power:	100		Excitation-Power:	100		Excitation-Power:	100		Excitation-Power:	100		Excitation-Power:	100		Excitation-Power:	100		Excitation-Power:	100		Excitation-Power:	100		Excitation-Power:	100		Excitation-Power:	100		Excitation-Power:	100		Excitation-Power:	100		Excitation-Power:	100		Excitation-Power:	100
Excitation type:	Red		Excitation type:	Red		Excitation type:	Red		Excitation type:	Red		Excitation type:	Red		Excitation type:	Red		Excitation type:	Red		Excitation type:	Red		Excitation type:	Red		Excitation type:	Red		Excitation type:	Red		Excitation type:	Red		Excitation type:	Red		Excitation type:	Red		Excitation type:	Red		Excitation type:	Red
Thermostat Setpoint:	(disabled)		Thermostat Setpoint:	(disabled)		Thermostat Setpoint:	(disabled)		Thermostat Setpoint:	(disabled)		Thermostat Setpoint:	(disabled)		Thermostat Setpoint:	(disabled)		Thermostat Setpoint:	(disabled)		Thermostat Setpoint:	(disabled)		Thermostat Setpoint:	(disabled)		Thermostat Setpoint:	(disabled)		Thermostat Setpoint:	(disabled)		Thermostat Setpoint:	(disabled)		Thermostat Setpoint:	(disabled)		Thermostat Setpoint:	(disabled)		Thermostat Setpoint:	(disabled)		Thermostat Setpoint:	(disabled)
Included	Included		Included	Included		Included	Included		Included	Included		Included	Included		Included	Included		Included	Included		Included	Included		Included	Included		Included	Included		Outlier	Outlier		Included	Included		Included	Included		Outlier	Outlier		Outlier	Outlier		Included	Included
Time [s]	Normalized Fluorescence [-]		Time [s]	Normalized Fluorescence [-]		Time [s]	Normalized Fluorescence [-]		Time [s]	Normalized Fluorescence [-]		Time [s]	Normalized Fluorescence [-]		Time [s]	Normalized Fluorescence [-]		Time [s]	Normalized Fluorescence [-]		Time [s]	Normalized Fluorescence [-]		Time [s]	Normalized Fluorescence [-]		Time [s]	Normalized Fluorescence [-]		Time [s]	Normalized Fluorescence [-]		Time [s]	Normalized Fluorescence [-]		Time [s]	Normalized Fluorescence [-]		Time [s]	Normalized Fluorescence [-]		Time [s]	Normalized Fluorescence [-]		Time [s]	Normalized Fluorescence [-]
-3.57675	1.0006		-3.57675	0.999547		-3.57675	1.00008		-3.57675	0.998896		-3.57675	0.999752		-3.57675	1.00132		-3.57675	1.0016		-3.57675	0.998281		-3.57675	1.00096		-3.57675	1.00022		-3.57675	1.00009		-3.57675	1.00092		-3.57675	1.00174		-3.57675	0.999327		-3.57675	0.999262		-3.57675	0.998898
-3.50223	0.99881		-3.50223	1.00073		-3.50223	0.999099		-3.50223	1.00023		-3.50223	1.00002		-3.50223	0.999016		-3.50223	0.999737		-3.50223	1.00008		-3.50223	0.998496		-3.50223	0.999575		-3.50223	0.999662		-3.50223	1.00115		-3.50223	1.00045		-3.50223	1.00094		-3.50223	0.999885		-3.50223	0.999563
-3.42772	1.00026		-3.42772	1.00007		-3.42772	1.00101		-3.42772	1.00171		-3.42772	1.0001		-3.42772	1.00015		-3.42772	0.999008		-3.42772	1.00068		-3.42772	1.00001		-3.42772	1.00077		-3.42772	0.99974		-3.42772	0.999762		-3.42772	0.999593		-3.42772	0.999422		-3.42772	0.999956		-3.42772	1.00026
-3.3532	0.999695		-3.3532	1.00055		-3.3532	0.999358		-3.3532	1.00034		-3.3532	1.00011		-3.3532	1.00047		-3.3532	0.99916		-3.3532	0.999822		-3.3532	1.00076		-3.3532	0.99984		-3.3532	0.999285		-3.3532	0.999501		-3.3532	1.00158		-3.3532	0.999062		-3.3532	0.998744		-3.3532	0.998757
-3.27869	0.999156		-3.27869	0.999927		-3.27869	0.99989		-3.27869	0.997866		-3.27869	1.00013		-3.27869	1.00015		-3.27869	1.00053		-3.27869	0.999195		-3.27869	0.999749		-3.27869	0.998394		-3.27869	1.00081		-3.27869	0.999821		-3.27869	1.00006		-3.27869	0.999143		-3.27869	1.00158		-3.27869	0.998927
-3.20417	1.00133		-3.20417	0.999026		-3.20417	0.998449		-3.20417	0.999		-3.20417	0.999423		-3.20417	0.998613		-3.20417	1.00029		-3.20417	1.00024		-3.20417	0.999144		-3.20417	0.999443		-3.20417	0.99913		-3.20417	0.998016		-3.20417	0.999224		-3.20417	0.999379		-3.20417	0.999191		-3.20417	0.999592
-3.12966	0.999207		-3.12966	0.998788		-3.12966	1.00092		-3.12966	0.999184		-3.12966	0.998736		-3.12966	1.0003		-3.12966	0.999297		-3.12966	0.997813		-3.12966	0.999869		-3.12966	1.00028		-3.12966	1.00063		-3.12966	1.00017		-3.12966	0.999929		-3.12966	0.998665		-3.12966	1.00033		-3.12966	0.999194
-3.05514	1.00012		-3.05514	1.00074		-3.05514	0.999661		-3.05514	1.00005		-3.05514	0.999998		-3.05514	0.999152		-3.05514	1.00031		-3.05514	0.999473		-3.05514	0.999518		-3.05514	0.997841		-3.05514	1.00023		-3.05514	0.999703		-3.05514	0.99939		-3.05514	1.00273		-3.05514	1.00013		-3.05514	0.999325
-2.98062	1.00035		-2.98062	0.999933		-2.98062	0.999543		-2.98062	0.999099		-2.98062	1.00014		-2.98062	0.999307		-2.98062	1.001		-2.98062	0.999919		-2.98062	0.99936		-2.98062	0.998796		-2.98062	0.998733		-2.98062	0.998837		-2.98062	0.999032		-2.98062	1.00052		-2.98062	0.999409		-2.98062	0.999199
-2.90611	0.999428		-2.90611	0.999077		-2.90611	0.999358		-2.90611	1.00011		-2.90611	0.999163		-2.90611	0.998894		-2.90611	0.99959		-2.90611	1.00059		-2.90611	0.999816		-2.90611	0.998876		-2.90611	0.998635		-2.90611	0.99896		-2.90611	0.999714		-2.90611	0.999919		-2.90611	0.999013		-2.90611	0.999228
-2.83159	0.998357		-2.83159	0.99999		-2.83159	0.999724		-2.83159	1.00018		-2.83159	0.999492		-2.83159	1.00064		-2.83159	0.999987		-2.83159	0.998121		-2.83159	1.00046		-2.83159	0.997912		-2.83159	0.999827		-2.83159	0.99987		-2.83159	0.99912		-2.83159	1.00036		-2.83159	1.00049		-2.83159	0.999471
-2.75708	0.999598		-2.75708	0.998918		-2.75708	0.998986		-2.75708	0.998934		-2.75708	0.998618		-2.75708	1.00065		-2.75708	0.999865		-2.75708	0.99827		-2.75708	0.998318		-2.75708	0.999788		-2.75708	0.99975		-2.75708	0.998488		-2.75708	0.999169		-2.75708	0.999976		-2.75708	0.999769		-2.75708	1.00005
-2.68256	1.00011		-2.68256	0.999967		-2.68256	1.00034		-2.68256	0.999775		-2.68256	0.998883		-2.68256	0.999016		-2.68256	0.998498		-2.68256	1.00047		-2.68256	0.997752		-2.68256	1.00069		-2.68256	0.997824		-2.68256	0.999964		-2.68256	0.998547		-2.68256	0.999356		-2.68256	1.00196		-2.68256	0.99999
-2.60805	0.999627		-2.60805	1.00009		-2.60805	1.00045		-2.60805	1.00041		-2.60805	1.00094		-2.60805	0.997909		-2.60805	0.999987		-2.60805	0.99919		-2.60805	0.998962		-2.60805	0.999764		-2.60805	0.999709		-2.60805	0.998941		-2.60805	1.00074		-2.60805	1.00007		-2.60805	0.999708		-2.60805	1.00083
-2.53353	0.998663		-2.53353	0.997892		-2.53353	0.999876		-2.53353	0.999166		-2.53353	1.00052		-2.53353	0.999923		-2.53353	0.998312		-2.53353	0.999627		-2.53353	0.999389		-2.53353	0.99923		-2.53353	0.998759		-2.53353	0.999492		-2.53353	0.999307		-2.53353	1		-2.53353	0.998775		-2.53353	1.0005
-2.45901	0.999338		-2.45901	0.998754		-2.45901	0.999529		-2.45901	0.999884		-2.45901	0.999939		-2.45901	0.999744		-2.45901	0.997524		-2.45901	0.998697		-2.45901	0.999096		-2.45901	1.00095		-2.45901	0.999951		-2.45901	0.999501		-2.45901	1.00045		-2.45901	1.00048		-2.45901	0.998983		-2.45901	1.00064
-2.3845	0.999451		-2.3845	0.998918		-2.3845	1.00042		-2.3845	1.00033		-2.3845	0.999615		-2.3845	0.999365		-2.3845	0.999233		-2.3845	1.00068		-2.3845	1.00002		-2.3845	0.999348		-2.3845	1.00024		-2.3845	0.998896		-2.3845	0.999318		-2.3845	0.998688		-2.3845	0.999622		-2.3845	0.999233
-2.30998	0.998703		-2.30998	1.00004		-2.30998	0.999773		-2.30998	1.00018		-2.30998	0.999624		-2.30998	0.999535		-2.30998	1.00001		-2.30998	0.99846		-2.30998	0.99889		-2.30998	1.00035		-2.30998	0.999182		-2.30998	0.999757		-2.30998	1.00047		-2.30998	0.99884		-2.30998	0.999044		-2.30998	1.00003
-2.23547	0.99889		-2.23547	0.998731		-2.23547	1.00016		-2.23547	0.999832		-2.23547	1.00008		-2.23547	0.999744		-2.23547	0.999081		-2.23547	0.999652		-2.23547	0.998957		-2.23547	0.999684		-2.23547	0.999213		-2.23547	1.00049		-2.23547	0.999632		-2.23547	0.997898		-2.23547	0.999338		-2.23547	0.999174
-2.16095	0.998419		-2.16095	0.999451		-2.16095	1.00052		-2.16095	0.998901		-2.16095	0.999286		-2.16095	0.999613		-2.16095	1.00005		-2.16095	1.00002		-2.16095	0.998774		-2.16095	0.999821		-2.16095	0.999827		-2.16095	1.00158		-2.16095	0.998019		-2.16095	0.998712		-2.16095	0.998856		-2.16095	1.00092
-2.08644	0.998124		-2.08644	0.998946		-2.08644	0.999949		-2.08644	1.00095		-2.08644	1.0005		-2.08644	0.998715		-2.08644	0.999444		-2.08644	0.998789		-2.08644	0.998793		-2.08644	0.999424		-2.08644	0.999915		-2.08644	0.999428		-2.08644	1.0009		-2.08644	0.999928		-2.08644	1.00041		-2.08644	0.99951
-2.01192	1.00036		-2.01192	0.997897		-2.01192	0.99772		-2.01192	0.999487		-2.01192	0.999296		-2.01192	0.998574		-2.01192	0.999032		-2.01192	0.99958		-2.01192	1.00083		-2.01192	1.0014		-2.01192	0.999781		-2.01192	0.999551		-2.01192	0.998382		-2.01192	0.99982		-2.01192	1.00131		-2.01192	1.00046
-1.93741	0.998124		-1.93741	0.997671		-1.93741	0.999304		-1.93741	0.999988		-1.93741	0.998574		-1.93741	0.998244		-1.93741	0.998734		-1.93741	1.00048		-1.93741	0.997286		-1.93741	1.00032		-1.93741	0.999358		-1.93741	0.99931		-1.93741	0.999092		-1.93741	0.998797		-1.93741	1.00027		-1.93741	0.999786
-1.86289	0.99737		-1.86289	0.998011		-1.86289	1.00026		-1.86289	1.00015		-1.86289	0.998549		-1.86289	0.999161		-1.86289	0.998528		-1.86289	0.998291		-1.86289	1.00002		-1.86289	0.999164		-1.86289	0.998702		-1.86289	1.00045		-1.86289	0.999362		-1.86289	0.999872		-1.86289	1.00042		-1.86289	0.999718
-1.78837	0.997875		-1.78837	1.00092		-1.78837	0.999925		-1.78837	0.999331		-1.78837	0.99934		-1.78837	0.999836		-1.78837	0.998562		-1.78837	0.998687		-1.78837	0.997723		-1.78837	0.998035		-1.78837	0.999616		-1.78837	0.998021		-1.78837	0.999186		-1.78837	0.999067		-1.78837	0.999515		-1.78837	0.998703
-1.71386	0.998113		-1.71386	0.999326		-1.71386	0.9997		-1.71386	0.998452		-1.71386	0.99961		-1.71386	0.999482		-1.71386	1.00034		-1.71386	0.998712		-1.71386	0.998141		-1.71386	1.0003		-1.71386	0.999605		-1.71386	1.00011		-1.71386	0.998944		-1.71386	0.998201		-1.71386	0.999353		-1.71386	0.999354
-1.63934	0.999196		-1.63934	0.99851		-1.63934	0.999299		-1.63934	0.999454		-1.63934	1		-1.63934	0.999215		-1.63934	0.998817		-1.63934	0.99899		-1.63934	0.997339		-1.63934	1.00004		-1.63934	1.00016		-1.63934	0.997912		-1.63934	1.00041		-1.63934	0.998826		-1.63934	0.999601		-1.63934	1.00004
-1.56483	0.997149		-1.56483	0.996775		-1.56483	0.997862		-1.56483	0.998849		-1.56483	0.9985		-1.56483	0.99972		-1.56483	0.997808		-1.56483	0.999688		-1.56483	0.99863		-1.56483	1.00059		-1.56483	0.998521		-1.56483	0.997947		-1.56483	0.997936		-1.56483	0.9992		-1.56483	0.99986		-1.56483	0.999918
-1.49031	0.997183		-1.49031	0.997483		-1.49031	0.999744		-1.49031	0.998896		-1.49031	1.00007		-1.49031	0.999161		-1.49031	0.998856		-1.49031	0.998789		-1.49031	0.998611		-1.49031	0.999448		-1.49031	0.999389		-1.49031	0.999		-1.49031	0.999164		-1.49031	0.999242		-1.49031	1.00005		-1.49031	0.998689
-1.4158	0.999712		-1.4158	0.99741		-1.4158	0.999138		-1.4158	0.998107		-1.4158	0.999531		-1.4158	0.999103		-1.4158	0.999243		-1.4158	0.997875		-1.4158	0.998232		-1.4158	0.999244		-1.4158	0.998883		-1.4158	0.998247		-1.4158	0.999555		-1.4158	0.998797		-1.4158	0.998724		-1.4158	0.999165
-1.34128	0.997398		-1.34128	0.997495		-1.34128	0.998595		-1.34128	0.999232		-1.34128	0.999747		-1.34128	0.999778		-1.34128	0.999297		-1.34128	0.997176		-1.34128	0.999456		-1.34128	0.999783		-1.34128	0.998645		-1.34128	0.997967		-1.34128	0.998724		-1.34128	0.998106		-1.34128	0.999581		-1.34128	0.999694
-1.26677	0.99699		-1.26677	0.998527		-1.26677	1.00024		-1.26677	0.998816		-1.26677	0.998377		-1.26677	0.998647		-1.26677	1.00024		-1.26677	0.999087		-1.26677	0.997373		-1.26677	1.00063		-1.26677	0.998516		-1.26677	0.997657		-1.26677	0.999913		-1.26677	0.99831		-1.26677	0.999946		-1.26677	0.999646
-1.19225	0.997551		-1.19225	0.999281		-1.19225	0.998791		-1.19225	0.999241		-1.19225	0.998652		-1.19225	0.999045		-1.19225	0.999713		-1.19225	0.998347		-1.19225	0.998582		-1.19225	0.999566		-1.19225	0.999182		-1.19225	0.996742		-1.19225	0.998679		-1.19225	0.99866		-1.19225	0.998486		-1.19225	0.998936
-1.11773	0.999763		-1.11773	0.999162		-1.11773	0.999006		-1.11773	0.99822		-1.11773	0.997955		-1.11773	0.999642		-1.11773	0.998063		-1.11773	0.998378		-1.11773	0.998059		-1.11773	0.997704		-1.11773	0.998542		-1.11773	0.998326		-1.11773	0.997898		-1.11773	0.997908		-1.11773	0.998744		-1.11773	0.999102
-1.04322	0.997245		-1.04322	0.997948		-1.04322	0.998879		-1.04322	0.99918		-1.04322	0.998603		-1.04322	0.998957		-1.04322	0.999835		-1.04322	0.998445		-1.04322	0.998035		-1.04322	0.998427		-1.04322	1.00003		-1.04322	0.998331		-1.04322	0.999252		-1.04322	0.998977		-1.04322	0.998242		-1.04322	0.999495
-0.968703	0.997801		-0.968703	0.998362		-0.968703	0.999177		-0.968703	0.999865		-0.968703	0.99879		-0.968703	0.997326		-0.968703	0.998748		-0.968703	0.997895		-0.968703	0.997862		-0.968703	1.00031		-0.968703	0.997566		-0.968703	0.998055		-0.968703	0.998905		-0.968703	0.997699		-0.968703	0.999581		-0.968703	1.00087
-0.894187	0.996242		-0.894187	0.997807		-0.894187	0.99882		-0.894187	1.00059		-0.894187	1.00013		-0.894187	0.998482		-0.894187	0.998753		-0.894187	0.996123		-0.894187	0.996585		-0.894187	0.999878		-0.894187	0.999956		-0.894187	0.99898		-0.894187	0.9983		-0.894187	0.999181		-0.894187	0.999465		-0.894187	1.00013
-0.819672	0.999615		-0.819672	0.997347		-0.819672	0.997896		-0.819672	0.997837		-0.819672	0.998338		-0.819672	0.998656		-0.819672	0.999904		-0.819672	0.99902		-0.819672	0.997084		-0.819672	0.999934		-0.819672	0.998748		-0.819672	0.998906		-0.819672	0.998129		-0.819672	0.999261		-0.819672	1.00019		-0.819672	1.00038
-0.745156	0.998805		-0.745156	0.998856		-0.745156	0.999235		-0.745156	0.997757		-0.745156	0.997106		-0.745156	0.999074		-0.745156	0.999399		-0.745156	0.997793		-0.745156	0.997493		-0.745156	1.00033		-0.745156	0.997706		-0.745156	0.999137		-0.745156	0.998035		-0.745156	0.999039		-0.745156	0.998815		-0.745156	0.998912
-0.67064	0.995799		-0.67064	0.998005		-0.67064	0.999416		-0.67064	0.998608		-0.67064	0.99879		-0.67064	0.998302		-0.67064	0.997842		-0.67064	0.998204		-0.67064	0.995318		-0.67064	0.998092		-0.67064	0.998341		-0.67064	0.999073		-0.67064	0.999208		-0.67064	1.00009		-0.67064	0.998755		-0.67064	0.997217
-0.596125	0.997342		-0.596125	0.997325		-0.596125	0.999939		-0.596125	0.998707		-0.596125	0.997631		-0.596125	0.998797		-0.596125	0.999576		-0.596125	0.998445		-0.596125	0.998112		-0.596125	0.998304		-0.596125	0.998604		-0.596125	0.998719		-0.596125	0.999725		-0.596125	0.998277		-0.596125	0.998978		-0.596125	0.997669
-0.521609	0.999213		-0.521609	0.997568		-0.521609	0.998507		-0.521609	0.997856		-0.521609	0.999354		-0.521609	0.99954		-0.521609	0.99793		-0.521609	0.997263		-0.521609	0.99851		-0.521609	0.997147		-0.521609	0.998578		-0.521609	0.998208		-0.521609	0.999758		-0.521609	0.99893		-0.521609	0.999292		-0.521609	0.997392
-0.447094	0.999037		-0.447094	0.996911		-0.447094	0.999333		-0.447094	0.998863		-0.447094	0.998746		-0.447094	0.999846		-0.447094	0.999566		-0.447094	0.996472		-0.447094	0.997483		-0.447094	0.997841		-0.447094	0.999038		-0.447094	0.996663		-0.447094	0.9989		-0.447094	1.00005		-0.447094	0.998902		-0.447094	0.997387
-0.372578	0.996735		-0.372578	0.99868		-0.372578	0.998141		-0.372578	0.997729		-0.372578	0.998952		-0.372578	0.997506		-0.372578	0.998484		-0.372578	0.997972		-0.372578	0.997939		-0.372578	0.997492		-0.372578	0.998521		-0.372578	0.99683		-0.372578	0.99776		-0.372578	0.998457		-0.372578	0.999896		-0.372578	0.996887
-0.298063	0.998617		-0.298063	0.999298		-0.298063	0.999367		-0.298063	0.998882		-0.298063	0.999698		-0.298063	0.999302		-0.298063	0.998993		-0.298063	0.997633		-0.298063	0.998467		-0.298063	0.997596		-0.298063	0.998434		-0.298063	0.998739		-0.298063	1.00028		-0.298063	0.999152		-0.298063	0.99844		-0.298063	0.998344
-0.223547	0.997325		-0.223547	0.99699		-0.223547	0.998194		-0.223547	0.998839		-0.223547	0.998151		-0.223547	0.997293		-0.223547	0.99675		-0.223547	0.996195		-0.223547	0.997176		-0.223547	0.999103		-0.223547	0.996539		-0.223547	0.998719		-0.223547	0.999142		-0.223547	0.997368		-0.223547	0.999262		-0.223547	0.998179
-0.149031	0.996588		-0.149031	0.997568		-0.149031	0.999382		-0.149031	0.998234		-0.149031	0.998338		-0.149031	0.998652		-0.149031	0.998601		-0.149031	0.996739		-0.149031	0.996936		-0.149031	0.998956		-0.149031	0.997158		-0.149031	0.99865		-0.149031	0.99956		-0.149031	0.997112		-0.149031	1.00018		-0.149031	0.99917
-0.0745156	0.996287		-0.0745156	0.998612		-0.0745156	0.999475		-0.0745156	1.00061		-0.0745156	0.999615		-0.0745156	0.997885		-0.0745156	0.99868		-0.0745156	0.997546		-0.0745156	0.997416		-0.0745156	0.996906		-0.0745156	0.999012		-0.0745156	0.99839		-0.0745156	0.998872		-0.0745156	0.9999		-0.0745156	0.998562		-0.0745156	0.998057
0	0.997654		0	0.996151		0	0.998483		0	0.998078		0	0.998073		0	0.997933		0	0.997529		0	0.998466		0	0.997204		0	0.999084		0	0.99817		0	0.998744		0	0.999736		0	0.997666		0	0.999226		0	0.999349
0.0745156	0.984958		0.0745156	0.987299		0.0745156	0.985218		0.0745156	0.986144		0.0745156	0.985208		0.0745156	0.985172		0.0745156	0.985875		0.0745156	0.98443		0.0745156	0.985136		0.0745156	0.986126		0.0745156	0.98544		0.0745156	0.986008		0.0745156	0.987531		0.0745156	0.984883		0.0745156	0.986984		0.0745156	0.986591
0.149031	0.97901		0.149031	0.978607		0.149031	0.978917		0.149031	0.977434		0.149031	0.977779		0.149031	0.979391		0.149031	0.978784		0.149031	0.977011		0.149031	0.976485		0.149031	0.978321		0.149031	0.978807		0.149031	0.977419		0.149031	0.978606		0.149031	0.977784		0.149031	0.979123		0.149031	0.97697
0.223547	0.975885		0.223547	0.974144		0.223547	0.973937		0.223547	0.972438		0.223547	0.972275		0.223547	0.974037		0.223547	0.972757		0.223547	0.973199		0.223547	0.971987		0.223547	0.974046		0.223547	0.973345		0.223547	0.972371		0.223547	0.972016		0.223547	0.971669		0.223547	0.973504		0.223547	0.971667
0.298062	0.972256		0.298062	0.970589		0.298062	0.970428		0.298062	0.970391		0.298062	0.968641		0.298062	0.969863		0.298062	0.966949		0.298062	0.968509		0.298062	0.968448		0.298062	0.968514		0.298062	0.968896		0.298062	0.968908		0.298062	0.968751		0.298062	0.966193		0.298062	0.971151		0.298062	0.968534
0.372578	0.96852		0.372578	0.969472		0.372578	0.968781		0.372578	0.965868		0.372578	0.966113		0.372578	0.964931		0.372578	0.964109		0.372578	0.963967		0.372578	0.964642		0.372578	0.966483		0.372578	0.965917		0.372578	0.965691		0.372578	0.965255		0.372578	0.964381		0.372578	0.967667		0.372578	0.966941
0.447093	0.967828		0.447093	0.966727		0.447093	0.965887		0.447093	0.964384		0.447093	0.962135		0.447093	0.961718		0.447093	0.960432		0.447093	0.961085		0.447093	0.961296		0.447093	0.961239		0.447093	0.963016		0.447093	0.96026		0.447093	0.963185		0.447093	0.961986		0.447093	0.965111		0.447093	0.962487
0.521609	0.966835		0.521609	0.965259		0.521609	0.961605		0.521609	0.958996		0.521609	0.960358		0.521609	0.960636		0.521609	0.959217		0.521609	0.959991		0.521609	0.958578		0.521609	0.958891		0.521609	0.960745		0.521609	0.96055		0.521609	0.959254		0.521609	0.958398		0.521609	0.962043		0.521609	0.959933
0.596125	0.962963		0.596125	0.962582		0.596125	0.960843		0.596125	0.95806		0.596125	0.958355		0.596125	0.958034		0.596125	0.954414		0.596125	0.956513		0.596125	0.957369		0.596125	0.957129		0.596125	0.958344		0.596125	0.958558		0.596125	0.957658		0.596125	0.954924		0.596125	0.95932		0.596125	0.957956
0.67064	0.963059		0.67064	0.960774		0.67064	0.958639		0.67064	0.95781		0.67064	0.955355		0.67064	0.957078		0.67064	0.955687		0.67064	0.955716		0.67064	0.954714		0.67064	0.953954		0.67064	0.955293		0.67064	0.955164		0.67064	0.956254		0.67064	0.953467		0.67064	0.959082		0.67064	0.955586
0.745156	0.959997		0.745156	0.957411		0.745156	0.957128		0.745156	0.954804		0.745156	0.95477		0.745156	0.953515		0.745156	0.952597		0.745156	0.952028		0.745156	0.952285		0.745156	0.952821		0.745156	0.955211		0.745156	0.951986		0.745156	0.953441		0.745156	0.95253		0.745156	0.956795		0.745156	0.954576
0.819672	0.959311		0.819672	0.956407		0.819672	0.955193		0.819672	0.951892		0.819672	0.952816		0.819672	0.952233		0.819672	0.94889		0.819672	0.949639		0.819672	0.951204		0.819672	0.95086		0.819672	0.953533		0.819672	0.949925		0.819672	0.951514		0.819672	0.949946		0.819672	0.954107		0.819672	0.951293
0.894187	0.958551		0.894187	0.956073		0.894187	0.953174		0.894187	0.949794		0.894187	0.950052		0.894187	0.951874		0.894187	0.949164		0.894187	0.94875		0.894187	0.949083		0.894187	0.950284		0.894187	0.950157		0.894187	0.949856		0.894187	0.950115		0.894187	0.948966		0.894187	0.952611		0.894187	0.949078
0.968703	0.955245		0.968703	0.954468		0.968703	0.953424		0.968703	0.949926		0.968703	0.949649		0.968703	0.947151		0.968703	0.946114		0.968703	0.94877		0.968703	0.946121		0.968703	0.948153		0.968703	0.950503		0.968703	0.946496		0.968703	0.94755		0.968703	0.945553		0.968703	0.951723		0.968703	0.948884
1.04322	0.955234		1.04322	0.952659		1.04322	0.951913		1.04322	0.947899		1.04322	0.946344		1.04322	0.946744		1.04322	0.943161		1.04322	0.945477		1.04322	0.945852		1.04322	0.945564		1.04322	0.947674		1.04322	0.943387		1.04322	0.945579		1.04322	0.942936		1.04322	0.950395		1.04322	0.946893
1.11773	0.955194		1.11773	0.952438		1.11773	0.949997		1.11773	0.946301		1.11773	0.94603		1.11773	0.945491		1.11773	0.941854		1.11773	0.942924		1.11773	0.942626		1.11773	0.94461		1.11773	0.946322		1.11773	0.942713		1.11773	0.944604		1.11773	0.943012		1.11773	0.948097		1.11773	0.94446
1.19225	0.953737		1.19225	0.951293		1.19225	0.948487		1.19225	0.944269		1.19225	0.943776		1.19225	0.94503		1.19225	0.939087		1.19225	0.942878		1.19225	0.941618		1.19225	0.941884		1.19225	0.945547		1.19225	0.941975		1.19225	0.942138		1.19225	0.940281		1.19225	0.946591		1.19225	0.942221
1.26677	0.950987		1.26677	0.94911		1.26677	0.947984		1.26677	0.944377		1.26677	0.942814		1.26677	0.943069		1.26677	0.938323		1.26677	0.940211		1.26677	0.939644		1.26677	0.939886		1.26677	0.94467		1.26677	0.94105		1.26677	0.942138		1.26677	0.938426		1.26677	0.945922		1.26677	0.940982
1.34128	0.951934		1.34128	0.948151		1.34128	0.946112		1.34128	0.943253		1.34128	0.93973		1.34128	0.939366		1.34128	0.936746		1.34128	0.939466		1.34128	0.938963		1.34128	0.939839		1.34128	0.9431		1.34128	0.938925		1.34128	0.940101		1.34128	0.937153		1.34128	0.942711		1.34128	0.940793
1.4158	0.949411		1.4158	0.949172		1.4158	0.942299		1.4158	0.941343		1.4158	0.939234		1.4158	0.94004		1.4158	0.93608		1.4158	0.938788		1.4158	0.935929		1.4158	0.93776		1.4158	0.940416		1.4158	0.938541		1.4158	0.938768		1.4158	0.934228		1.4158	0.943822		1.4158	0.938991
1.49031	0.949229		1.49031	0.947255		1.49031	0.943511		1.49031	0.940388		1.49031	0.938135		1.49031	0.93889		1.49031	0.93398		1.49031	0.936805		1.49031	0.934805		1.49031	0.936863		1.49031	0.939642		1.49031	0.935949		1.49031	0.937976		1.49031	0.934237		1.49031	0.943315		1.49031	0.938326
1.56483	0.948112		1.56483	0.945259		1.56483	0.942294		1.56483	0.940275		1.56483	0.936725		1.56483	0.936866		1.56483	0.932041		1.56483	0.934976		1.56483	0.936562		1.56483	0.935441		1.56483	0.937195		1.56483	0.935413		1.56483	0.935773		1.56483	0.933059		1.56483	0.940434		1.56483	0.936257
1.63934	0.946037		1.63934	0.943666		1.63934	0.940056		1.63934	0.937708		1.63934	0.934526		1.63934	0.936206		1.63934	0.931296		1.63934	0.935536		1.63934	0.932477		1.63934	0.935922		1.63934	0.936828		1.63934	0.93559		1.63934	0.934469		1.63934	0.931403		1.63934	0.939567		1.63934	0.933445
1.71386	0.946071		1.71386	0.944777		1.71386	0.938638		1.71386	0.937652		1.71386	0.93512		1.71386	0.934769		1.71386	0.93039		1.71386	0.932988		1.71386	0.932333		1.71386	0.933669		1.71386	0.935347		1.71386	0.934689		1.71386	0.932806		1.71386	0.929135		1.71386	0.939816		1.71386	0.934363
1.78837	0.946156		1.78837	0.943399		1.78837	0.938027		1.78837	0.936291		1.78837	0.933961		1.78837	0.934347		1.78837	0.928789		1.78837	0.931401		1.78837	0.929885		1.78837	0.931477		1.78837	0.934072		1.78837	0.932338		1.78837	0.932833		1.78837	0.927924		1.78837	0.937802		1.78837	0.932964
1.86289	0.943803		1.86289	0.941086		1.86289	0.938829		1.86289	0.935917		1.86289	0.931442		1.86289	0.932803		1.86289	0.928158		1.86289	0.930707		1.86289	0.928358		1.86289	0.930362		1.86289	0.933158		1.86289	0.930262		1.86289	0.93187		1.86289	0.926722		1.86289	0.936631		1.86289	0.930604
1.93741	0.943667		1.93741	0.942039		1.93741	0.937226		1.93741	0.936418		1.93741	0.929964		1.93741	0.9324		1.93741	0.925171		1.93741	0.927907		1.93741	0.927096		1.93741	0.92851		1.93741	0.932859		1.93741	0.928939		1.93741	0.929249		1.93741	0.925941		1.93741	0.936175		1.93741	0.928608
2.01192	0.942272		2.01192	0.939379		2.01192	0.935896		2.01192	0.933497		2.01192	0.928398		2.01192	0.931201		2.01192	0.925469		2.01192	0.92858		2.01192	0.92675		2.01192	0.92664		2.01192	0.931687		2.01192	0.928088		2.01192	0.929216		2.01192	0.92543		2.01192	0.93553		2.01192	0.929215
2.08644	0.940922		2.08644	0.93951		2.08644	0.934968		2.08644	0.932836		2.08644	0.928982		2.08644	0.930978		2.08644	0.922477		2.08644	0.927799		2.08644	0.925929		2.08644	0.928061		2.08644	0.930515		2.08644	0.928831		2.08644	0.928203		2.08644	0.924171		2.08644	0.934734		2.08644	0.928326
2.16095	0.942255		2.16095	0.938489		2.16095	0.935413		2.16095	0.933133		2.16095	0.927671		2.16095	0.928648		2.16095	0.922756		2.16095	0.926566		2.16095	0.926423		2.16095	0.924164		2.16095	0.930747		2.16095	0.927733		2.16095	0.928137		2.16095	0.920328		2.16095	0.932924		2.16095	0.924494
2.23547	0.939062		2.23547	0.937474		2.23547	0.933076		2.23547	0.930817		2.23547	0.926439		2.23547	0.928624		2.23547	0.92072		2.23547	0.92614		2.23547	0.925046		2.23547	0.924155		2.23547	0.930845		2.23547	0.926499		2.23547	0.925874		2.23547	0.92144		2.23547	0.933051		2.23547	0.924164
2.30998	0.940701		2.30998	0.937423		2.30998	0.933521		2.30998	0.929754		2.30998	0.923748		2.30998	0.927202		2.30998	0.921669		2.30998	0.924424		2.30998	0.923212		2.30998	0.923588		2.30998	0.928863		2.30998	0.925697		2.30998	0.925533		2.30998	0.919045		2.30998	0.932244		2.30998	0.922474
2.3845	0.940446		2.3845	0.937502		2.3845	0.932993		2.3845	0.930127		2.3845	0.923458		2.3845	0.926842		2.3845	0.920039		2.3845	0.923273		2.3845	0.921839		2.3845	0.921212		2.3845	0.92797		2.3845	0.926115		2.3845	0.92577		2.3845	0.919045		2.3845	0.931676		2.3845	0.92328
2.45901	0.93722		2.45901	0.936839		2.45901	0.929635		2.45901	0.927991		2.45901	0.923355		2.45901	0.926333		2.45901	0.91784		2.45901	0.922687		2.45901	0.921263		2.45901	0.9209		2.45901	0.926741		2.45901	0.92431		2.45901	0.923149		2.45901	0.9178		2.45901	0.929075		2.45901	0.92242
2.53353	0.937066		2.53353	0.935472		2.53353	0.931297		2.53353	0.926427		2.53353	0.92253		2.53353	0.925983		2.53353	0.917933		2.53353	0.921223		2.53353	0.91941		2.53353	0.919535		2.53353	0.925812		2.53353	0.923149		2.53353	0.921899		2.53353	0.917961		2.53353	0.929465		2.53353	0.921109
2.60805	0.936471		2.60805	0.935234		2.60805	0.929059		2.60805	0.927953		2.60805	0.922299		2.60805	0.92344		2.60805	0.917111		2.60805	0.921177		2.60805	0.918752		2.60805	0.919596		2.60805	0.925394		2.60805	0.922814		2.60805	0.922268		2.60805	0.917351		2.60805	0.929323		2.60805	0.920385
2.68256	0.936596		2.68256	0.933199		2.68256	0.928389		2.68256	0.926545		2.68256	0.920586		2.68256	0.922838		2.68256	0.914755		2.68256	0.919934		2.68256	0.917547		2.68256	0.919676		2.68256	0.92414		2.68256	0.923045		2.68256	0.923458		2.68256	0.914639		2.68256	0.927153		2.68256	0.918161
2.75708	0.934611		2.75708	0.933958		2.75708	0.928145		2.75708	0.925595		2.75708	0.919137		2.75708	0.920692		2.75708	0.914887		2.75708	0.919111		2.75708	0.916779		2.75708	0.91687		2.75708	0.924186		2.75708	0.921452		2.75708	0.919323		2.75708	0.914625		2.75708	0.927447		2.75708	0.918409
2.83159	0.934934		2.83159	0.932144		2.83159	0.929381		2.83159	0.924262		2.83159	0.920026		2.83159	0.92112		2.83159	0.912948		2.83159	0.918233		2.83159	0.914571		2.83159	0.91755		2.83159	0.922596		2.83159	0.919794		2.83159	0.920974		2.83159	0.912135		2.83159	0.926463		2.83159	0.917442
2.90611	0.932615		2.90611	0.932756		2.90611	0.926194		2.90611	0.924479		2.90611	0.920306		2.90611	0.922022		2.90611	0.913027		2.90611	0.917283		2.90611	0.915166		2.90611	0.916119		2.90611	0.922472		2.90611	0.919912		2.90611	0.917506		2.90611	0.913006		2.90611	0.926316		2.90611	0.915786
2.98062	0.934362		2.98062	0.93177		2.98062	0.924611		2.98062	0.921814		2.98062	0.917065		2.98062	0.918722		2.98062	0.913394		2.98062	0.916866		2.98062	0.914095		2.98062	0.916813		2.98062	0.923567		2.98062	0.919804		2.98062	0.9182		2.98062	0.910981		2.98062	0.925652		2.98062	0.914548
3.05514	0.93363		3.05514	0.931747		3.05514	0.923365		3.05514	0.922111		3.05514	0.916191		3.05514	0.919989		3.05514	0.910309		3.05514	0.915628		3.05514	0.912132		3.05514	0.913176		3.05514	0.921037		3.05514	0.91913		3.05514	0.918932		3.05514	0.911648		3.05514	0.92694		3.05514	0.914125
3.12966	0.932156		3.12966	0.929927		3.12966	0.923624		3.12966	0.922589		3.12966	0.916437		3.12966	0.918921		3.12966	0.910035		3.12966	0.915623		3.12966	0.911873		3.12966	0.913809		3.12966	0.920361		3.12966	0.919125		3.12966	0.916972		3.12966	0.909935		3.12966	0.924145		3.12966	0.913727
3.20417	0.932836		3.20417	0.929604		3.20417	0.923565		3.20417	0.920821		3.20417	0.915499		3.20417	0.917722		3.20417	0.909281		3.20417	0.913465		3.20417	0.912838		3.20417	0.912207		3.20417	0.919282		3.20417	0.916222		3.20417	0.915419		3.20417	0.910181		3.20417	0.923111		3.20417	0.91261
3.27869	0.930353		3.27869	0.93008		3.27869	0.923971		3.27869	0.920816		3.27869	0.914806		3.27869	0.918047		3.27869	0.907616		3.27869	0.914349		3.27869	0.909194		3.27869	0.912916		3.27869	0.918585		3.27869	0.916001		3.27869	0.913713		3.27869	0.908415		3.27869	0.923501		3.27869	0.911284
3.3532	0.931532		3.3532	0.929672		3.3532	0.923325		3.3532	0.920254		3.3532	0.912189		3.3532	0.916858		3.3532	0.909105		3.3532	0.914986		3.3532	0.909871		3.3532	0.911617		3.3532	0.918539		3.3532	0.915401		3.3532	0.913757		3.3532	0.908851		3.3532	0.922756		3.3532	0.910624
3.42772	0.930228		3.42772	0.930324		3.42772	0.921888		3.42772	0.91937		3.42772	0.911742		3.42772	0.914877		3.42772	0.907719		3.42772	0.913054		3.42772	0.909799		3.42772	0.909458		3.42772	0.918936		3.42772	0.915563		3.42772	0.913168		3.42772	0.905453		3.42772	0.920362		3.42772	0.910959
3.50223	0.930256		3.50223	0.927472		3.50223	0.920994		3.50223	0.9198		3.50223	0.912887		3.50223	0.915261		3.50223	0.907856		3.50223	0.911123		3.50223	0.909472		3.50223	0.908721		3.50223	0.916102		3.50223	0.91243		3.50223	0.912727		3.50223	0.906039		3.50223	0.922142		3.50223	0.90853
3.57675	0.930103		3.57675	0.928997		3.57675	0.92183		3.57675	0.919313		3.57675	0.910981		3.57675	0.916261		3.57675	0.907058		3.57675	0.910275		3.57675	0.907869		3.57675	0.90985		3.57675	0.91539		3.57675	0.914289		3.57675	0.912953		3.57675	0.9047		3.57675	0.921833		3.57675	0.908457
3.65126	0.929429		3.65126	0.926927		3.65126	0.920613		3.65126	0.919157		3.65126	0.912273		3.65126	0.914358		3.65126	0.906333		3.65126	0.910814		3.65126	0.906371		3.65126	0.909004		3.65126	0.91555		3.65126	0.912415		3.65126	0.908736		3.65126	0.903853		3.65126	0.919733		3.65126	0.90751
3.72578	0.928555		3.72578	0.927307		3.72578	0.920246		3.72578	0.919706		3.72578	0.911374		3.72578	0.914198		3.72578	0.905266		3.72578	0.91026		3.72578	0.907254		3.72578	0.909675		3.72578	0.916861		3.72578	0.91178		3.72578	0.911494		3.72578	0.90276		3.72578	0.917826		3.72578	0.909482
3.8003	0.92872		3.8003	0.925765		3.8003	0.919982		3.8003	0.918519		3.8003	0.911978		3.8003	0.913208		3.8003	0.905001		3.8003	0.910599		3.8003	0.906289		3.8003	0.906869		3.8003	0.915405		3.8003	0.911534		3.8003	0.910079		3.8003	0.902556		3.8003	0.919546		3.8003	0.905752
3.87481	0.928816		3.87481	0.925555		3.87481	0.917719		3.87481	0.917286		3.87481	0.909651		3.87481	0.913062		3.87481	0.904369		3.87481	0.909212		3.87481	0.90458		3.87481	0.905938		3.87481	0.914125		3.87481	0.910009		3.87481	0.909732		3.87481	0.90248		3.87481	0.918455		3.87481	0.905985
3.94933	0.926248		3.94933	0.926933		3.94933	0.918286		3.94933	0.91635		3.94933	0.909209		3.94933	0.90998		3.94933	0.903468		3.94933	0.908477		3.94933	0.903678		3.94933	0.906302		3.94933	0.912814		3.94933	0.910368		3.94933	0.909617		3.94933	0.901245		3.94933	0.917253		3.94933	0.902673
4.02384	0.925936		4.02384	0.925787		4.02384	0.917851		4.02384	0.915617		4.02384	0.908978		4.02384	0.911484		4.02384	0.903037		4.02384	0.907002		4.02384	0.903908		4.02384	0.906189		4.02384	0.91411		4.02384	0.908976		4.02384	0.907503		4.02384	0.901004		4.02384	0.917801		4.02384	0.904441
4.09836	0.925709		4.09836	0.923463		4.09836	0.91726		4.09836	0.916686		4.09836	0.907844		4.09836	0.909795		4.09836	0.903708		4.09836	0.906319		4.09836	0.904446		4.09836	0.903803		4.09836	0.912225		4.09836	0.908489		4.09836	0.907723		4.09836	0.899021		4.09836	0.917243		4.09836	0.904062
4.17287	0.927274		4.17287	0.923326		4.17287	0.917318		4.17287	0.915854		4.17287	0.908379		4.17287	0.909756		4.17287	0.902386		4.17287	0.90618		4.17287	0.903083		4.17287	0.905764		4.17287	0.913072		4.17287	0.907515		4.17287	0.905961		4.17287	0.898618		4.17287	0.916183		4.17287	0.903028
4.24739	0.923429		4.24739	0.923984		4.24739	0.917441		4.24739	0.914502		4.24739	0.90588		4.24739	0.910412		4.24739	0.90055		4.24739	0.904732		4.24739	0.902204		4.24739	0.904479		4.24739	0.911554		4.24739	0.908214		4.24739	0.90682		4.24739	0.899314		4.24739	0.916625		4.24739	0.902528
4.3219	0.925766		4.3219	0.922657		4.3219	0.915608		4.3219	0.914422		4.3219	0.90613		4.3219	0.910412		4.3219	0.90029		4.3219	0.903499		4.3219	0.901978		4.3219	0.901984		4.3219	0.910672		4.3219	0.908051		4.3219	0.906363		4.3219	0.898869		4.3219	0.914485		4.3219	0.901809
4.39642	0.924461		4.39642	0.922238		4.39642	0.915593		4.39642	0.914923		4.39642	0.905836		4.39642	0.908528		4.39642	0.899194		4.39642	0.902112		4.39642	0.900596		4.39642	0.901989		4.39642	0.910966		4.39642	0.906221		4.39642	0.905416		4.39642	0.897629		4.39642	0.915656		4.39642	0.902251
4.47094	0.923781		4.47094	0.921864		4.47094	0.915383		4.47094	0.91324		4.47094	0.90506		4.47094	0.908368		4.47094	0.899551		4.47094	0.901803		4.47094	0.901369		4.47094	0.9012		4.47094	0.910186		4.47094	0.904647		4.47094	0.904541		4.47094	0.894894		4.47094	0.913825		4.47094	0.900798
4.54545	0.925664		4.54545	0.921983		4.54545	0.914968		4.54545	0.914568		4.54545	0.904682		4.54545	0.906849		4.54545	0.899341		4.54545	0.899779		4.54545	0.899641		4.54545	0.901479		4.54545	0.910223		4.54545	0.906989		4.54545	0.905377		4.54545	0.895665		4.54545	0.912963		4.54545	0.900711
4.61997	0.922448		4.61997	0.921211		4.61997	0.914489		4.61997	0.912356		4.61997	0.9042		4.61997	0.906106		4.61997	0.898317		4.61997	0.900355		4.61997	0.9005		4.61997	0.9001		4.61997	0.909995		4.61997	0.905513		4.61997	0.904722		4.61997	0.893616		4.61997	0.912502		4.61997	0.899375
4.69448	0.923804		4.69448	0.920883		4.69448	0.913511		4.69448	0.913703		4.69448	0.902703		4.69448	0.906296		4.69448	0.898151		4.69448	0.898834		4.69448	0.899444		4.69448	0.900246		4.69448	0.9095		4.69448	0.905297		4.69448	0.902091		4.69448	0.89354		4.69448	0.91168		4.69448	0.898526
4.769	0.922828		4.769	0.920843		4.769	0.912597		4.769	0.912399		4.769	0.902595		4.769	0.90632		4.769	0.897098		4.769	0.898967		4.769	0.900284		4.769	0.897511		4.769	0.909866		4.769	0.904534		4.769	0.902382		4.769	0.892934		4.769	0.913227		4.769	0.898972
4.84351	0.923775		4.84351	0.918994		4.84351	0.912763		4.84351	0.912399		4.84351	0.901686		4.84351	0.905063		4.84351	0.897749		4.84351	0.896866		4.84351	0.89856		4.84351	0.898796		4.84351	0.906779		4.84351	0.904155		4.84351	0.900692		4.84351	0.892774		4.84351	0.912202		4.84351	0.897807
4.91803	0.92259		4.91803	0.918773		4.91803	0.913682		4.91803	0.911066		4.91803	0.901269		4.91803	0.904296		4.91803	0.897034		4.91803	0.896548		4.91803	0.897509		4.91803	0.898021		4.91803	0.910016		4.91803	0.903639		4.91803	0.902063		4.91803	0.891363		4.91803	0.911477		4.91803	0.896903
4.99255	0.92195		4.99255	0.918807		4.99255	0.913496		4.99255	0.910485		4.99255	0.901824		4.99255	0.905757		4.99255	0.89607		4.99255	0.897894		4.99255	0.895694		4.99255	0.897747		4.99255	0.907936		4.99255	0.902758		4.99255	0.901689		4.99255	0.891524		4.99255	0.910747		4.99255	0.897404
5.06706	0.921263		5.06706	0.918217		5.06706	0.910969		5.06706	0.91125		5.06706	0.900537		5.06706	0.904412		5.06706	0.896295		5.06706	0.896301		5.06706	0.896362		5.06706	0.896462		5.06706	0.907399		5.06706	0.903019		5.06706	0.899998		5.06706	0.890615		5.06706	0.912172		5.06706	0.896957
5.14158	0.920356		5.14158	0.917021		5.14158	0.912059		5.14158	0.91186		5.14158	0.898667		5.14158	0.904951		5.14158	0.894747		5.14158	0.895094		5.14158	0.896208		5.14158	0.895295		5.14158	0.90649		5.14158	0.903073		5.14158	0.899525		5.14158	0.890611		5.14158	0.911954		5.14158	0.895243
5.21609	0.918831		5.21609	0.917112		5.21609	0.912553		5.21609	0.910002		5.21609	0.900194		5.21609	0.904349		5.21609	0.893592		5.21609	0.894241		5.21609	0.896789		5.21609	0.894327		5.21609	0.90776		5.21609	0.903043		5.21609	0.899569		5.21609	0.892045		5.21609	0.910133		5.21609	0.896792
5.29061	0.921252		5.29061	0.917288		5.29061	0.911268		5.29061	0.91091		5.29061	0.898406		5.29061	0.904208		5.29061	0.896123		5.29061	0.892792		5.29061	0.8958		5.29061	0.893854		5.29061	0.906697		5.29061	0.902128		5.29061	0.898264		5.29061	0.88885		5.29061	0.910762		5.29061	0.895014
5.36512	0.919619		5.36512	0.91731		5.36512	0.910881		5.36512	0.909015		5.36512	0.899212		5.36512	0.902849		5.36512	0.895756		5.36512	0.892237		5.36512	0.894744		5.36512	0.893821		5.36512	0.905432		5.36512	0.902404		5.36512	0.897928		5.36512	0.890194		5.36512	0.909205		5.36512	0.894781
5.43964	0.918043		5.43964	0.916874		5.43964	0.909503		5.43964	0.909497		5.43964	0.896919		5.43964	0.902966		5.43964	0.894478		5.43964	0.891205		5.43964	0.893731		5.43964	0.892716		5.43964	0.904854		5.43964	0.901076		5.43964	0.896233		5.43964	0.888732		5.43964	0.909677		5.43964	0.892941
5.51415	0.919846		5.51415	0.916233		5.51415	0.910627		5.51415	0.908216		5.51415	0.896909		5.51415	0.903233		5.51415	0.892559		5.51415	0.891754		5.51415	0.894773		5.51415	0.892272		5.51415	0.905164		5.51415	0.901169		5.51415	0.895968		5.51415	0.887264		5.51415	0.907359		5.51415	0.894718
5.58867	0.91654		5.58867	0.915343		5.58867	0.91074		5.58867	0.907611		5.58867	0.895716		5.58867	0.901932		5.58867	0.892113		5.58867	0.890013		5.58867	0.892843		5.58867	0.892626		5.58867	0.905189		5.58867	0.900052		5.58867	0.895589		5.58867	0.886924		5.58867	0.909408		5.58867	0.892523
5.66319	0.918031		5.66319	0.914583		5.66319	0.907773		5.66319	0.909171		5.66319	0.894527		5.66319	0.900995		5.66319	0.892784		5.66319	0.890645		5.66319	0.893779		5.66319	0.89136		5.66319	0.904095		5.66319	0.900618		5.66319	0.895919		5.66319	0.885305		5.66319	0.907299		5.66319	0.89297
5.7377	0.91802		5.7377	0.913687		5.7377	0.908247		5.7377	0.908433		5.7377	0.894159		5.7377	0.900811		5.7377	0.891702		5.7377	0.889489		5.7377	0.892065		5.7377	0.890845		5.7377	0.9049		5.7377	0.899236		5.7377	0.89441		5.7377	0.887468		5.7377	0.907826		5.7377	0.891993
5.81222	0.917504		5.81222	0.914929		5.81222	0.909146		5.81222	0.906599		5.81222	0.894901		5.81222	0.900281		5.81222	0.892226		5.81222	0.890208		5.81222	0.891835		5.81222	0.890552		5.81222	0.903145		5.81222	0.899595		5.81222	0.894988		5.81222	0.885007		5.81222	0.907709		5.81222	0.892513
5.88673	0.917164		5.88673	0.914838		5.88673	0.906414		5.88673	0.907327		5.88673	0.893246		5.88673	0.901097		5.88673	0.890644		5.88673	0.888179		5.88673	0.89206		5.88673	0.889777		5.88673	0.904018		5.88673	0.899477		5.88673	0.894988		5.88673	0.883933		5.88673	0.907527		5.88673	0.891702
5.96125	0.916353		5.96125	0.913795		5.96125	0.907089		5.96125	0.906874		5.96125	0.892833		5.96125	0.900825		5.96125	0.8913		5.96125	0.886771		5.96125	0.891945		5.96125	0.88998		5.96125	0.903083		5.96125	0.899339		5.96125	0.893408		5.96125	0.884728		5.96125	0.907577		5.96125	0.890332
6.03576	0.914998		6.03576	0.913613		6.03576	0.907612		6.03576	0.907469		6.03576	0.891822		6.03576	0.899354		6.03576	0.891702		6.03576	0.885898		6.03576	0.890822		6.03576	0.889031		6.03576	0.899831		6.03576	0.89867		6.03576	0.893645		6.03576	0.88345		6.03576	0.90708		6.03576	0.890949
6.11028	0.914351		6.11028	0.913182		6.11028	0.908887		6.11028	0.906892		6.11028	0.891547		6.11028	0.899228		6.11028	0.890223		6.11028	0.886463		6.11028	0.892516		6.11028	0.887477		6.11028	0.901426		6.11028	0.89688		6.11028	0.892836		6.11028	0.883502		6.11028	0.907091		6.11028	0.89042
6.18479	0.914913		6.18479	0.913165		6.18479	0.908252		6.18479	0.905531		6.18479	0.892112		6.18479	0.897631		6.18479	0.891041		6.18479	0.885805		6.18479	0.890164		6.18479	0.8887		6.18479	0.901581		6.18479	0.897391		6.18479	0.892175		6.18479	0.88318		6.18479	0.906411		6.18479	0.889138
6.25931	0.914039		6.25931	0.910625		6.25931	0.906888		6.25931	0.905295		6.25931	0.89246		6.25931	0.897524		6.25931	0.890703		6.25931	0.886185		6.25931	0.889737		6.25931	0.887736		6.25931	0.901199		6.25931	0.896511		6.25931	0.891526		6.25931	0.881491		6.25931	0.90459		6.25931	0.889308
6.33383	0.915026		6.33383	0.911889		6.33383	0.906712		6.33383	0.905531		6.33383	0.890899		6.33383	0.89866		6.33383	0.889474		6.33383	0.885374		6.33383	0.889079		6.33383	0.887765		6.33383	0.901746		6.33383	0.897185		6.33383	0.891894		6.33383	0.881188		6.33383	0.906781		6.33383	0.887773
6.40834	0.915718		6.40834	0.914759		6.40834	0.905832		6.40834	0.90538		6.40834	0.888822		6.40834	0.897291		6.40834	0.888808		6.40834	0.886		6.40834	0.889165		6.40834	0.888138		6.40834	0.900817		6.40834	0.896506		6.40834	0.890573		6.40834	0.881817		6.40834	0.9049		6.40834	0.888346
6.48286	0.915327		6.48286	0.912955		6.48286	0.906072		6.48286	0.905399		6.48286	0.889298		6.48286	0.897437		6.48286	0.890487		6.48286	0.884777		6.48286	0.887576		6.48286	0.887656		6.48286	0.900822		6.48286	0.895305		6.48286	0.890292		6.48286	0.880165		6.48286	0.904519		6.48286	0.886098
6.55737	0.91303		6.55737	0.913182		6.55737	0.905163		6.55737	0.905664		6.55737	0.889234		6.55737	0.896937		6.55737	0.889366		6.55737	0.884423		6.55737	0.88797		6.55737	0.887632		6.55737	0.898313		6.55737	0.894371		6.55737	0.889411		6.55737	0.879943		6.55737	0.904621		6.55737	0.886705
6.63189	0.912129		6.63189	0.911509		6.63189	0.905803		6.63189	0.904255		6.63189	0.888974		6.63189	0.896457		6.63189	0.888969		6.63189	0.88356		6.63189	0.888796		6.63189	0.885247		6.63189	0.897694		6.63189	0.894164		6.63189	0.890903		6.63189	0.879512		6.63189	0.904509		6.63189	0.887919
6.7064	0.913892		6.7064	0.910931		6.7064	0.904073		6.7064	0.905697		6.7064	0.887756		6.7064	0.895864		6.7064	0.887941		6.7064	0.882769		6.7064	0.888623		6.7064	0.886518		6.7064	0.898917		6.7064	0.893264		6.7064	0.888393		6.7064	0.879337		6.7064	0.904545		6.7064	0.887933
6.78092	0.911896		6.78092	0.911226		6.78092	0.905134		6.78092	0.903886		6.78092	0.888616		6.78092	0.896088		6.78092	0.887206		6.78092	0.88299		6.78092	0.886343		6.78092	0.885034		6.78092	0.897436		6.78092	0.893092		6.78092	0.886813		6.78092	0.879541		6.78092	0.902608		6.78092	0.885442
6.85544	0.911913		6.85544	0.911407		6.85544	0.904327		6.85544	0.903277		6.85544	0.888228		6.85544	0.896612		6.85544	0.888411		6.85544	0.883457		6.85544	0.885738		6.85544	0.884387		6.85544	0.897787		6.85544	0.894577		6.85544	0.886378		6.85544	0.877917		6.85544	0.903967		6.85544	0.885379
6.92995	0.912378		6.92995	0.910659		6.92995	0.903926		6.92995	0.90348		6.92995	0.886116		6.92995	0.893913		6.92995	0.888117		6.92995	0.881721		6.92995	0.885815		6.92995	0.884075		6.92995	0.897818		6.92995	0.891085		6.92995	0.886191		6.92995	0.878059		6.92995	0.90386		6.92995	0.886044
7.00447	0.912826		7.00447	0.911895		7.00447	0.902172		7.00447	0.903546		7.00447	0.887732		7.00447	0.893001		7.00447	0.888426		7.00447	0.882034		7.00447	0.884418		7.00447	0.884718		7.00447	0.896367		7.00447	0.89196		7.00447	0.887512		7.00447	0.878338		7.00447	0.902501		7.00447	0.883611
7.07898	0.913053		7.07898	0.911033		7.07898	0.902147		7.07898	0.902464		7.07898	0.887344		7.07898	0.893044		7.07898	0.886967		7.07898	0.881505		7.07898	0.884547		7.07898	0.882261		7.07898	0.897364		7.07898	0.891296		7.07898	0.884396		7.07898	0.876904		7.07898	0.902405		7.07898	0.884675
7.1535	0.91354		7.1535	0.909763		7.1535	0.901473		7.1535	0.903872		7.1535	0.884324		7.1535	0.892452		7.1535	0.885238		7.1535	0.881664		7.1535	0.884034		7.1535	0.884567		7.1535	0.897198		7.1535	0.892339		7.1535	0.884957		7.1535	0.87584		7.1535	0.902973		7.1535	0.885597
7.22801	0.912316		7.22801	0.909383		7.22801	0.901556		7.22801	0.903201		7.22801	0.885439		7.22801	0.891923		7.22801	0.885752		7.22801	0.880498		7.22801	0.883659		7.22801	0.88313		7.22801	0.89613		7.22801	0.89105		7.22801	0.885211		7.22801	0.876332		7.22801	0.90169		7.22801	0.883023
7.30253	0.912333		7.30253	0.90788		7.30253	0.90008		7.30253	0.901608		7.30253	0.885066		7.30253	0.892554		7.30253	0.88658		7.30253	0.879322		7.30253	0.884058		7.30253	0.883952		7.30253	0.895872		7.30253	0.890278		7.30253	0.885007		7.30253	0.875589		7.30253	0.902542		7.30253	0.884675
7.37704	0.910779		7.37704	0.909202		7.37704	0.899791		7.37704	0.902317		7.37704	0.884678		7.37704	0.892908		7.37704	0.886869		7.37704	0.880154		7.37704	0.884211		7.37704	0.882172		7.37704	0.894979		7.37704	0.889683		7.37704	0.885249		7.37704	0.875963		7.37704	0.900954		7.37704	0.883455
7.45156	0.911822		7.45156	0.908306		7.45156	0.899708		7.45156	0.899453		7.45156	0.88398		7.45156	0.89251		7.45156	0.885135		7.45156	0.880257		7.45156	0.882934		7.45156	0.882323		7.45156	0.895051		7.45156	0.890268		7.45156	0.885244		7.45156	0.875944		7.45156	0.90032		7.45156	0.883319
7.52608	0.910337		7.52608	0.907557		7.52608	0.898188		7.52608	0.900587		7.52608	0.885606		7.52608	0.890418		7.52608	0.885067		7.52608	0.880287		7.52608	0.881748		7.52608	0.881548		7.52608	0.893518		7.52608	0.88954		7.52608	0.882684		7.52608	0.875433		7.52608	0.901203		7.52608	0.882581
7.60059	0.910144		7.60059	0.907143		7.60059	0.899371		7.60059	0.900332		7.60059	0.884344		7.60059	0.892384		7.60059	0.885081		7.60059	0.878032		7.60059	0.880179		7.60059	0.880405		7.60059	0.893316		7.60059	0.889181		7.60059	0.883498		7.60059	0.874159		7.60059	0.901806		7.60059	0.881809
7.67511	0.911397		7.67511	0.907733		7.67511	0.899596		7.67511	0.89968		7.67511	0.884079		7.67511	0.891049		7.67511	0.883798		7.67511	0.87704		7.67511	0.880409		7.67511	0.881127		7.67511	0.893249		7.67511	0.89017		7.67511	0.882739		7.67511	0.873923		7.67511	0.900128		7.67511	0.881552
7.74962	0.909588		7.74962	0.907563		7.74962	0.898897		7.74962	0.898645		7.74962	0.884633		7.74962	0.890447		7.74962	0.882981		7.74962	0.878505		7.74962	0.881321		7.74962	0.87928		7.74962	0.89439		7.74962	0.888143		7.74962	0.883311		7.74962	0.874131		7.74962	0.899463		7.74962	0.880857
7.82414	0.910405		7.82414	0.907512		7.82414	0.898697		7.82414	0.898347		7.82414	0.884192		7.82414	0.889185		7.82414	0.883387		7.82414	0.877857		7.82414	0.879449		7.82414	0.879743		7.82414	0.892609		7.82414	0.88768		7.82414	0.881731		7.82414	0.871911		7.82414	0.899605		7.82414	0.880663
7.89865	0.910337		7.89865	0.905079		7.89865	0.898706		7.89865	0.899288		7.89865	0.884496		7.89865	0.889214		7.89865	0.884577		7.89865	0.877431		7.89865	0.879795		7.89865	0.880211		7.89865	0.891897		7.89865	0.887612		7.89865	0.883278		7.89865	0.873085		7.89865	0.900838		7.89865	0.880367
7.97317	0.91079		7.97317	0.906383		7.97317	0.897328		7.97317	0.899666		7.97317	0.883725		7.97317	0.889248		7.97317	0.88347		7.97317	0.877791		7.97317	0.878225		7.97317	0.877211		7.97317	0.893735		7.97317	0.886392		7.97317	0.88183		7.97317	0.871949		7.97317	0.900138		7.97317	0.881557
8.04768	0.91015		8.04768	0.90686		8.04768	0.896844		8.04768	0.898139		8.04768	0.883774		8.04768	0.888617		8.04768	0.883113		8.04768	0.87741		8.04768	0.878422		8.04768	0.878047		8.04768	0.891809		8.04768	0.887218		8.04768	0.879865		8.04768	0.871713		8.04768	0.897577		8.04768	0.881445
8.1222	0.909673		8.1222	0.903945		8.1222	0.897597		8.1222	0.897756		8.1222	0.882601		8.1222	0.8882		8.1222	0.883436		8.1222	0.877446		8.1222	0.878465		8.1222	0.878803		8.1222	0.890219		8.1222	0.886382		8.1222	0.881582		8.1222	0.871036		8.1222	0.899281		8.1222	0.878803
8.19672	0.909974		8.19672	0.906128		8.19672	0.897856		8.19672	0.897577		8.19672	0.883755		8.19672	0.887909		8.19672	0.883578		8.19672	0.875838		8.19672	0.876578		8.19672	0.879044		8.19672	0.890911		8.19672	0.887233		8.19672	0.880168		8.19672	0.871727		8.19672	0.897374		8.19672	0.879327
8.27123	0.909458		8.27123	0.904212		8.27123	0.897372		8.27123	0.897558		8.27123	0.883278		8.27123	0.887482		8.27123	0.881541		8.27123	0.875854		8.27123	0.877327		8.27123	0.878028		8.27123	0.891412		8.27123	0.886608		8.27123	0.880949		8.27123	0.869957		8.27123	0.89743		8.27123	0.878366
8.34575	0.908239		8.34575	0.904433		8.34575	0.897431		8.34575	0.897917		8.34575	0.883131		8.34575	0.886098		8.34575	0.882927		8.34575	0.873696		8.34575	0.876953		8.34575	0.87595		8.34575	0.891298		8.34575	0.886431		8.34575	0.879331		8.34575	0.870813		8.34575	0.897536		8.34575	0.878987
8.42026	0.90846		8.42026	0.903304		8.42026	0.89594		8.42026	0.897525		8.42026	0.88238		8.42026	0.886559		8.42026	0.881952		8.42026	0.875104		8.42026	0.875306		8.42026	0.877688		8.42026	0.889507		8.42026	0.885831		8.42026	0.879243		8.42026	0.868598		8.42026	0.89784		8.42026	0.877628
8.49478	0.909322		8.49478	0.903355		8.49478	0.898144		8.49478	0.89856		8.49478	0.882576		8.49478	0.887341		8.49478	0.881923		8.49478	0.874898		8.49478	0.87666		8.49478	0.876153		8.49478	0.890534		8.49478	0.884429		8.49478	0.878499		8.49478	0.869441		8.49478	0.895594		8.49478	0.878205
8.56929	0.907314		8.56929	0.904206		8.56929	0.895935		8.56929	0.897539		8.56929	0.88208		8.56929	0.885996		8.56929	0.881585		8.56929	0.874158		8.56929	0.875292		8.56929	0.876035		8.56929	0.889362		8.56929	0.885275		8.56929	0.878885		8.56929	0.869924		8.56929	0.896131		8.56929	0.877375
8.64381	0.908397		8.64381	0.904149		8.64381	0.896565		8.64381	0.897468		8.64381	0.880715		8.64381	0.887297		8.64381	0.880723		8.64381	0.873552		8.64381	0.875512		8.64381	0.875605		8.64381	0.88898		8.64381	0.885609		8.64381	0.878554		8.64381	0.869465		8.64381	0.897338		8.64381	0.878225
8.71833	0.907864		8.71833	0.902102		8.71833	0.896966		8.71833	0.896542		8.71833	0.881363		8.71833	0.887205		8.71833	0.882795		8.71833	0.873788		8.71833	0.874749		8.71833	0.875057		8.71833	0.888748		8.71833	0.883071		8.71833	0.877872		8.71833	0.868243		8.71833	0.897039		8.71833	0.878196
8.79284	0.90745		8.79284	0.902788		8.79284	0.895148		8.79284	0.895095		8.79284	0.880597		8.79284	0.886021		8.79284	0.880831		8.79284	0.871852		8.79284	0.874955		8.79284	0.87586		8.79284	0.88817		8.79284	0.884832		8.79284	0.878202		8.79284	0.867164		8.79284	0.896395		8.79284	0.877375
8.86736	0.907331		8.86736	0.902142		8.86736	0.895148		8.86736	0.896702		8.86736	0.881059		8.86736	0.884458		8.86736	0.880547		8.86736	0.871148		8.86736	0.874379		8.86736	0.874674		8.86736	0.889656		8.86736	0.88496		8.86736	0.878142		8.86736	0.86707		8.86736	0.896076		8.86736	0.876671
8.94187	0.90563		8.94187	0.901195		8.94187	0.894972		8.94187	0.895842		8.94187	0.879782		8.94187	0.885045		8.94187	0.881551		8.94187	0.871328		8.94187	0.873842		8.94187	0.874466		8.94187	0.886771		8.94187	0.884665		8.94187	0.878208		8.94187	0.867959		8.94187	0.895842		8.94187	0.877443
9.01639	0.90719		9.01639	0.902947		9.01639	0.894874		9.01639	0.894845		9.01639	0.880607		9.01639	0.884467		9.01639	0.882408		9.01639	0.872396		9.01639	0.874024		9.01639	0.874844		9.01639	0.885568		9.01639	0.884193		9.01639	0.877784		9.01639	0.867505		9.01639	0.896177		9.01639	0.875894
9.0909	0.90757		9.0909	0.900827		9.0909	0.893613		9.0909	0.89683		9.0909	0.881555		9.0909	0.885157		9.0909	0.881678		9.0909	0.872561		9.0909	0.873976		9.0909	0.87269		9.0909	0.886699		9.0909	0.882914		9.0909	0.876732		9.0909	0.866639		9.0909	0.894412		9.0909	0.875602
9.16542	0.909271		9.16542	0.901031		9.16542	0.893902		9.16542	0.894112		9.16542	0.880416		9.16542	0.884739		9.16542	0.881546		9.16542	0.870233		9.16542	0.87281		9.16542	0.873191		9.16542	0.886079		9.16542	0.883568		9.16542	0.87845		9.16542	0.865039		9.16542	0.894367		9.16542	0.875214
9.23993	0.905455		9.23993	0.899403		9.23993	0.895436		9.23993	0.893049		9.23993	0.880867		9.23993	0.884152		9.23993	0.881007		9.23993	0.870726		9.23993	0.873294		9.23993	0.873224		9.23993	0.886461		9.23993	0.883956		9.23993	0.877299		9.23993	0.866942		9.23993	0.895624		9.23993	0.873975
9.31445	0.906986		9.31445	0.899432		9.31445	0.893706		9.31445	0.89415		9.31445	0.881344		9.31445	0.88371		9.31445	0.880929		9.31445	0.868281		9.31445	0.872843		9.31445	0.874131		9.31445	0.88628		9.31445	0.883386		9.31445	0.875631		9.31445	0.865915		9.31445	0.893408		9.31445	0.873742
9.38897	0.905364		9.38897	0.901252		9.38897	0.894288		9.38897	0.892732		9.38897	0.879488		9.38897	0.883938		9.38897	0.880077		9.38897	0.869894		9.38897	0.874		9.38897	0.87244		9.38897	0.884376		9.38897	0.88164		9.38897	0.876809		9.38897	0.86618		9.38897	0.89565		9.38897	0.872081
9.46348	0.906844		9.46348	0.900033		9.46348	0.894131		9.46348	0.891952		9.46348	0.87964		9.46348	0.884341		9.46348	0.879994		9.46348	0.869761		9.46348	0.872992		9.46348	0.871736		9.46348	0.883354		9.46348	0.881886		9.46348	0.875901		9.46348	0.864765		9.46348	0.895427		9.46348	0.873373
9.538	0.906719		9.538	0.899942		9.538	0.892538		9.538	0.893011		9.538	0.879223		9.538	0.882128		9.538	0.879666		9.538	0.86919		9.538	0.872838		9.538	0.871023		9.538	0.884241		9.538	0.882225		9.538	0.875108		9.538	0.864755		9.538	0.893114		9.538	0.872562
9.61251	0.906849		9.61251	0.899976		9.61251	0.894542		9.61251	0.892808		9.61251	0.881088		9.61251	0.883118		9.61251	0.880865		9.61251	0.86767		9.61251	0.872757		9.61251	0.871972		9.61251	0.885522		9.61251	0.882235		9.61251	0.87502		9.61251	0.864746		9.61251	0.894539		9.61251	0.873019
9.68703	0.906299		9.68703	0.899823		9.68703	0.892264		9.68703	0.89173		9.68703	0.880106		9.68703	0.881749		9.68703	0.879661		9.68703	0.868142		9.68703	0.870832		9.68703	0.871641		9.68703	0.884236		9.68703	0.881566		9.68703	0.876292		9.68703	0.863823		9.68703	0.895254		9.68703	0.872208
9.76154	0.905982		9.76154	0.898434		9.76154	0.892191		9.76154	0.891782		9.76154	0.879792		9.76154	0.882079		9.76154	0.879871		9.76154	0.868594		9.76154	0.872402		9.76154	0.869624		9.76154	0.883736		9.76154	0.882604		9.76154	0.876237		9.76154	0.866052		9.76154	0.892891		9.76154	0.871532
9.83606	0.906214		9.83606	0.898309		9.83606	0.892074		9.83606	0.892047		9.83606	0.880042		9.83606	0.882429		9.83606	0.879088		9.83606	0.86692		9.83606	0.871758		9.83606	0.87167		9.83606	0.882941		9.83606	0.881182		9.83606	0.875196		9.83606	0.863151		9.83606	0.893515		9.83606	0.871183
9.91057	0.905874		9.91057	0.899057		9.91057	0.891952		9.91057	0.891007		9.91057	0.879979		9.91057	0.881608		9.91057	0.879651		9.91057	0.86582		9.91057	0.870107		9.91057	0.869478		9.91057	0.882822		9.91057	0.881777		9.91057	0.87546		9.91057	0.863842		9.91057	0.893408		9.91057	0.871285
9.98509	0.906532		9.98509	0.898836		9.98509	0.89158		9.98509	0.891267		9.98509	0.87993		9.98509	0.881773		9.98509	0.879533		9.98509	0.867176		9.98509	0.86991		9.98509	0.869057		9.98509	0.884654		9.98509	0.88159		9.98509	0.875279		9.98509	0.863284		9.98509	0.893388		9.98509	0.871702
10.0596	0.90533		10.0596	0.897628		10.0596	0.891111		10.0596	0.892264		10.0596	0.88018		10.0596	0.881696		10.0596	0.878133		10.0596	0.865476		10.0596	0.868422		10.0596	0.869856		10.0596	0.881268		10.0596	0.880144		10.0596	0.873743		10.0596	0.863137		10.0596	0.89388		10.0596	0.872378
10.1341	0.905024		10.1341	0.897867		10.1341	0.889606		10.1341	0.889537		10.1341	0.879272		10.1341	0.879376		10.1341	0.878911		10.1341	0.863688		10.1341	0.870116		10.1341	0.868901		10.1341	0.882734		10.1341	0.881157		10.1341	0.875725		10.1341	0.862365		10.1341	0.893723		10.1341	0.870372
10.2086	0.906549		10.2086	0.897532		10.2086	0.890774		10.2086	0.89061		10.2086	0.879223		10.2086	0.881429		10.2086	0.878339		10.2086	0.864238		10.2086	0.87062		10.2086	0.867583		10.2086	0.881903		10.2086	0.880528		10.2086	0.874618		10.2086	0.863941		10.2086	0.892982		10.2086	0.868949
10.2832	0.90592		10.2832	0.897095		10.2832	0.892768		10.2832	0.88949		10.2832	0.877209		10.2832	0.879089		10.2832	0.878285		10.2832	0.864721		10.2832	0.868854		10.2832	0.868717		10.2832	0.881779		10.2832	0.880297		10.2832	0.873319		10.2832	0.861575		10.2832	0.893018		10.2832	0.870095
10.3577	0.906022		10.3577	0.898785		10.3577	0.891072		10.3577	0.889343		10.3577	0.879497		10.3577	0.880672		10.3577	0.878192		10.3577	0.863113		10.3577	0.86894		10.3577	0.867423		10.3577	0.881784		10.3577	0.879303		10.3577	0.874541		10.3577	0.863563		10.3577	0.893155		10.3577	0.869449
10.4322	0.906464		10.4322	0.898479		10.4322	0.890779		10.4322	0.889443		10.4322	0.87801		10.4322	0.879439		10.4322	0.878765		10.4322	0.863339		10.4322	0.868249		10.4322	0.867787		10.4322	0.882724		10.4322	0.87701		10.4322	0.876336		10.4322	0.862176		10.4322	0.892277		10.4322	0.869604
10.5067	0.905335		10.5067	0.898241		10.5067	0.89095		10.5067	0.888143		10.5067	0.878113		10.5067	0.879706		10.5067	0.877305		10.5067	0.865425		10.5067	0.869564		10.5067	0.866931		10.5067	0.881521		10.5067	0.878457		10.5067	0.874034		10.5067	0.862157		10.5067	0.893799		10.5067	0.869585
10.5812	0.905443		10.5812	0.897368		10.5812	0.88964		10.5812	0.887141		10.5812	0.877411		10.5812	0.879638		10.5812	0.877619		10.5812	0.863339		10.5812	0.869103		10.5812	0.866799		10.5812	0.882146		10.5812	0.87854		10.5812	0.873974		10.5812	0.861991		10.5812	0.892145		10.5812	0.867773
10.6557	0.905426		10.6557	0.896228		10.6557	0.890813		10.6557	0.888063		10.6557	0.87662		10.6557	0.879482		10.6557	0.877472		10.6557	0.862393		10.6557	0.867975		10.6557	0.868127		10.6557	0.881407		10.6557	0.876951		10.6557	0.874464		10.6557	0.862096		10.6557	0.893494		10.6557	0.867438
10.7302	0.907428		10.7302	0.89718		10.7302	0.890324		10.7302	0.887812		10.7302	0.877568		10.7302	0.880938		10.7302	0.878157		10.7302	0.861962		10.7302	0.867716		10.7302	0.866058		10.7302	0.881036		10.7302	0.878403		10.7302	0.871667		10.7302	0.862313		10.7302	0.891831		10.7302	0.867939
10.8048	0.906549		10.8048	0.896602		10.8048	0.889664		10.8048	0.886654		10.8048	0.876468		10.8048	0.880089		10.8048	0.87781		10.8048	0.862188		10.8048	0.867827		10.8048	0.866856		10.8048	0.87957		10.8048	0.877935		10.8048	0.872675		10.8048	0.860548		10.8048	0.892369		10.8048	0.866686
10.8793	0.906254		10.8793	0.895451		10.8793	0.889371		10.8793	0.888044		10.8793	0.876998		10.8793	0.879147		10.8793	0.874842		10.8793	0.860616		10.8793	0.867673		10.8793	0.866643		10.8793	0.880649		10.8793	0.876292		10.8793	0.872961		10.8793	0.862829		10.8793	0.891699		10.8793	0.866229
10.9538	0.905806		10.9538	0.89768		10.9538	0.888916		10.9538	0.886867		10.9538	0.876871		10.9538	0.879589		10.9538	0.877692		10.9538	0.86134		10.9538	0.867745		10.9538	0.865519		10.9538	0.880323		10.9538	0.877778		10.9538	0.872779		10.9538	0.860524		10.9538	0.892029		10.9538	0.866812
11.0283	0.905392		11.0283	0.895604		11.0283	0.890368		11.0283	0.887396		11.0283	0.876409		11.0283	0.877492		11.0283	0.877575		11.0283	0.861674		11.0283	0.86761		11.0283	0.86558		11.0283	0.880938		11.0283	0.877557		11.0283	0.873055		11.0283	0.862938		11.0283	0.891816		11.0283	0.865879
11.1028	0.905148		11.1028	0.897124		11.1028	0.887362		11.1028	0.887169		11.1028	0.876625		11.1028	0.879443		11.1028	0.877168		11.1028	0.861571		11.1028	0.867846		11.1028	0.86439		11.1028	0.881475		11.1028	0.875864		11.1028	0.873071		11.1028	0.861873		11.1028	0.8914		11.1028	0.865389
11.1773	0.905908		11.1773	0.895712		11.1773	0.889635		11.1773	0.88663		11.1773	0.874877		11.1773	0.880215		11.1773	0.876796		11.1773	0.860462		11.1773	0.867274		11.1773	0.864347		11.1773	0.878191		11.1773	0.877242		11.1773	0.872509		11.1773	0.859952		11.1773	0.890452		11.1773	0.865782
11.2519	0.904224		11.2519	0.895876		11.2519	0.888677		11.2519	0.886285		11.2519	0.875736		11.2519	0.878948		11.2519	0.876164		11.2519	0.859748		11.2519	0.867073		11.2519	0.865117		11.2519	0.87751		11.2519	0.875372		11.2519	0.872586		11.2519	0.862176		11.2519	0.890325		11.2519	0.865097
11.3264	0.904899		11.3264	0.896636		11.3264	0.88897		11.3264	0.885284		11.3264	0.875618		11.3264	0.880011		11.3264	0.876757		11.3264	0.861186		11.3264	0.866607		11.3264	0.86422		11.3264	0.879466		11.3264	0.875594		11.3264	0.872774		11.3264	0.86149		11.3264	0.889564		11.3264	0.865345
11.4009	0.904162		11.4009	0.895661		11.4009	0.889048		11.4009	0.884839		11.4009	0.876532		11.4009	0.879322		11.4009	0.875709		11.4009	0.858972		11.4009	0.866765		11.4009	0.863256		11.4009	0.87816		11.4009	0.874005		11.4009	0.872355		11.4009	0.86043		11.4009	0.891801		11.4009	0.863626
11.4754	0.904734		11.4754	0.896075		11.4754	0.888985		11.4754	0.884258		11.4754	0.87417		11.4754	0.878337		11.4754	0.875352		11.4754	0.858345		11.4754	0.866924		11.4754	0.864494		11.4754	0.878253		11.4754	0.87429		11.4754	0.870384		11.4754	0.861433		11.4754	0.889645		11.4754	0.864189
11.5499	0.905234		11.5499	0.896347		11.5499	0.887553		11.5499	0.885099		11.5499	0.8739		11.5499	0.879541		11.5499	0.876081		11.5499	0.86039		11.5499	0.866722		11.5499	0.864423		11.5499	0.876865		11.5499	0.874295		11.5499	0.871507		11.5499	0.8606		11.5499	0.890573		11.5499	0.863966
11.6244	0.906708		11.6244	0.89582		11.6244	0.889674		11.6244	0.884641		11.6244	0.873217		11.6244	0.877298		11.6244	0.874622		11.6244	0.859727		11.6244	0.865772		11.6244	0.86465		11.6244	0.878171		11.6244	0.87309		11.6244	0.870313		11.6244	0.860179		11.6244	0.891369		11.6244	0.864456
11.6989	0.904275		11.6989	0.896256		11.6989	0.888638		11.6989	0.883866		11.6989	0.873969		11.6989	0.878118		11.6989	0.87425		11.6989	0.858283		11.6989	0.867308		11.6989	0.863927		11.6989	0.878243		11.6989	0.873528		11.6989	0.870852		11.6989	0.861793		11.6989	0.891364		11.6989	0.863747
11.7735	0.905591		11.7735	0.894209		11.7735	0.887934		11.7735	0.883823		11.7735	0.872289		11.7735	0.87906		11.7735	0.875092		11.7735	0.858643		11.7735	0.866535		11.7735	0.863653		11.7735	0.877815		11.7735	0.87306		11.7735	0.869834		11.7735	0.860188		11.7735	0.890375		11.7735	0.864641
11.848	0.904564		11.848	0.894725		11.848	0.888848		11.848	0.883866		11.848	0.8736		11.848	0.877521		11.848	0.8752		11.848	0.857975		11.848	0.866574		11.848	0.86293		11.848	0.877716		11.848	0.872357		11.848	0.87001		11.848	0.860538		11.848	0.891359		11.848	0.862941
11.9225	0.903323		11.9225	0.896307		11.9225	0.888877		11.9225	0.884423		11.9225	0.87278		11.9225	0.878293		11.9225	0.872781		11.9225	0.858294		11.9225	0.866473		11.9225	0.863294		11.9225	0.878109		11.9225	0.87278		11.9225	0.872295		11.9225	0.861135		11.9225	0.889924		11.9225	0.863135
11.997	0.906005		11.997	0.89574		11.997	0.888178		11.997	0.883521		11.997	0.870222		11.997	0.87824		11.997	0.873486		11.997	0.857893		11.997	0.865709		11.997	0.863521		11.997	0.877742		11.997	0.873473		11.997	0.869432		11.997	0.859526		11.997	0.890573		11.997	0.864359
12.0715	0.904581		12.0715	0.893971		12.0715	0.88723		12.0715	0.882571		12.0715	0.87253		12.0715	0.876483		12.0715	0.87355		12.0715	0.855905		12.0715	0.865359		12.0715	0.863388		12.0715	0.877386		12.0715	0.872288		12.0715	0.870979		12.0715	0.859952		12.0715	0.889092		12.0715	0.861873
12.146	0.904632		12.146	0.896903		12.146	0.88747		12.146	0.883847		12.146	0.871852		12.146	0.877832		12.146	0.871929		12.146	0.857338		12.146	0.865104		12.146	0.862675		12.146	0.87752		12.146	0.872273		12.146	0.869239		12.146	0.859232		12.146	0.890583		12.146	0.86299
12.2206	0.905687		12.2206	0.896404		12.2206	0.888462		12.2206	0.884532		12.2206	0.870664		12.2206	0.878395		12.2206	0.873021		12.2206	0.857148		12.2206	0.86424		12.2206	0.861168		12.2206	0.877396		12.2206	0.870409		12.2206	0.869327		12.2206	0.86104		12.2206	0.891537		12.2206	0.862863
12.2951	0.904031		12.2951	0.895264		12.2951	0.888555		12.2951	0.883459		12.2951	0.871838		12.2951	0.877259		12.2951	0.872071		12.2951	0.85816		12.2951	0.864586		12.2951	0.861896		12.2951	0.876674		12.2951	0.872317		12.2951	0.868254		12.2951	0.859308		12.2951	0.890416		12.2951	0.863315
12.3696	0.906209		12.3696	0.89591		12.3696	0.888579		12.3696	0.883516		12.3696	0.871823		12.3696	0.87774		12.3696	0.871963		12.3696	0.858119		12.3696	0.865277		12.3696	0.86182		12.3696	0.876431		12.3696	0.872096		12.3696	0.869377		12.3696	0.860344		12.3696	0.889092		12.3696	0.861659
12.4441	0.90567		12.4441	0.894549		12.4441	0.887734		12.4441	0.882641		12.4441	0.870743		12.4441	0.877652		12.4441	0.872433		12.4441	0.856814		12.4441	0.864284		12.4441	0.861267		12.4441	0.874851		12.4441	0.870123		12.4441	0.86892		12.4441	0.859786		12.4441	0.889868		12.4441	0.863053
12.5186	0.904973		12.5186	0.894555		12.5186	0.888794		12.5186	0.884494		12.5186	0.87116		12.5186	0.877633		12.5186	0.871997		12.5186	0.857353		12.5186	0.865983		12.5186	0.861376		12.5186	0.876256		12.5186	0.869764		12.5186	0.868567		12.5186	0.85962		12.5186	0.889417		12.5186	0.862494
12.5931	0.9055		12.5931	0.89354		12.5931	0.888613		12.5931	0.885378		12.5931	0.871445		12.5931	0.877356		12.5931	0.871425		12.5931	0.856357		12.5931	0.865767		12.5931	0.860644		12.5931	0.877128		12.5931	0.871157		12.5931	0.867532		12.5931	0.859213		12.5931	0.888388		12.5931	0.860882
12.6677	0.905727		12.6677	0.894861		12.6677	0.888525		12.6677	0.884891		12.6677	0.870664		12.6677	0.878822		12.6677	0.871454		12.6677	0.856213		12.6677	0.863976		12.6677	0.862155		12.6677	0.877923		12.6677	0.868761		12.6677	0.867351		12.6677	0.858792		12.6677	0.889392		12.6677	0.862276
12.7422	0.905608		12.7422	0.894209		12.7422	0.888183		12.7422	0.884329		12.7422	0.871116		12.7422	0.877196		12.7422	0.86879		12.7422	0.857097		12.7422	0.864212		12.7422	0.860899		12.7422	0.875342		12.7422	0.870084		12.7422	0.868171		12.7422	0.858328		12.7422	0.890594		12.7422	0.861071
12.8167	0.904718		12.8167	0.896245		12.8167	0.88874		12.8167	0.883166		12.8167	0.870816		12.8167	0.877696		12.8167	0.870661		12.8167	0.855745		12.8167	0.866314		12.8167	0.860913		12.8167	0.876328		12.8167	0.868608		12.8167	0.867274		12.8167	0.85848		12.8167	0.889356		12.8167	0.861406
12.8912	0.905749		12.8912	0.894782		12.8912	0.887968		12.8912	0.88466		12.8912	0.870193		12.8912	0.876793		12.8912	0.870313		12.8912	0.857955		12.8912	0.864456		12.8912	0.859411		12.8912	0.875858		12.8912	0.868958		12.8912	0.866872		12.8912	0.858579		12.8912	0.889498		12.8912	0.860935
12.9657	0.906073		12.9657	0.895451		12.9657	0.88897		12.9657	0.884055		12.9657	0.870257		12.9657	0.876861		12.9657	0.868937		12.9657	0.85574		12.9657	0.865719		12.9657	0.860776		12.9657	0.876612		12.9657	0.869081		12.9657	0.866255		12.9657	0.859261		12.9657	0.888443		12.9657	0.860275
13.0402	0.905109		13.0402	0.893551		13.0402	0.889039		13.0402	0.88388		13.0402	0.871342		13.0402	0.876191		13.0402	0.871082		13.0402	0.85609		13.0402	0.863631		13.0402	0.860412		13.0402	0.876467		13.0402	0.868357		13.0402	0.866756		13.0402	0.857864		13.0402	0.88854		13.0402	0.861105
13.1147	0.905171		13.1147	0.89489		13.1147	0.888648		13.1147	0.883502		13.1147	0.871356		13.1147	0.878269		13.1147	0.869466		13.1147	0.855422		13.1147	0.863007		13.1147	0.859519		13.1147	0.876823		13.1147	0.867305		13.1147	0.868391		13.1147	0.85962		13.1147	0.889944		13.1147	0.861635
13.1893	0.904627		13.1893	0.895751		13.1893	0.889302		13.1893	0.883955		13.1893	0.869343		13.1893	0.87857		13.1893	0.868452		13.1893	0.854867		13.1893	0.864562		13.1893	0.858197		13.1893	0.876539		13.1893	0.867767		13.1893	0.865071		13.1893	0.858333		13.1893	0.889721		13.1893	0.861232
13.2638	0.906662		13.2638	0.894311		13.2638	0.889527		13.2638	0.884248		13.2638	0.869338		13.2638	0.878439		13.2638	0.870626		13.2638	0.855216		13.2638	0.864509		13.2638	0.859127		13.2638	0.875399		13.2638	0.867944		13.2638	0.866492		13.2638	0.857779		13.2638	0.889473		13.2638	0.860595
13.3383	0.906299		13.3383	0.895139		13.3383	0.889953		13.3383	0.883209		13.3383	0.869579		13.3383	0.877541		13.3383	0.867576		13.3383	0.856033		13.3383	0.864346		13.3383	0.859108		13.3383	0.875874		13.3383	0.867895		13.3383	0.866536		13.3383	0.858589		13.3383	0.88965		13.3383	0.860561
13.4128	0.905455		13.4128	0.89489		13.4128	0.888662		13.4128	0.882287		13.4128	0.869162		13.4128	0.877623		13.4128	0.869035		13.4128	0.855098		13.4128	0.864581		13.4128	0.857951		13.4128	0.874851		13.4128	0.867939		13.4128	0.867698		13.4128	0.857244		13.4128	0.88783		13.4128	0.860911
13.4873	0.905727		13.4873	0.894623		13.4873	0.888921		13.4873	0.883634		13.4873	0.870109		13.4873	0.878021		13.4873	0.867365		13.4873	0.854533		13.4873	0.863549		13.4873	0.859751		13.4873	0.876338		13.4873	0.86701		13.4873	0.865958		13.4873	0.85812		13.4873	0.888606		13.4873	0.862412
13.5618	0.907796		13.5618	0.893761		13.5618	0.888462		13.5618	0.882807		13.5618	0.869098		13.5618	0.875939		13.5618	0.867767		13.5618	0.854091		13.5618	0.86462		13.5618	0.858782		13.5618	0.875166		13.5618	0.86697		13.5618	0.866084		13.5618	0.859871		13.5618	0.887414		13.5618	0.86113
13.6364	0.907995		13.6364	0.895746		13.6364	0.888696		13.6364	0.88215		13.6364	0.868057		13.6364	0.877186		13.6364	0.866523		13.6364	0.853562		13.6364	0.864197		13.6364	0.859439		13.6364	0.87513		13.6364	0.865686		13.6364	0.867026		13.6364	0.857798		13.6364	0.890543		13.6364	0.8606
13.7109	0.907161		13.7109	0.894617		13.7109	0.890441		13.7109	0.882533		13.7109	0.868666		13.7109	0.877313		13.7109	0.865137		13.7109	0.854476		13.7109	0.863122		13.7109	0.858825		13.7109	0.875812		13.7109	0.865804		13.7109	0.866162		13.7109	0.856705		13.7109	0.888879		13.7109	0.859415
13.7854	0.905761		13.7854	0.893869		13.7854	0.889234		13.7854	0.880827		13.7854	0.867541		13.7854	0.876167		13.7854	0.866121		13.7854	0.854369		13.7854	0.864269		13.7854	0.85823		13.7854	0.875233		13.7854	0.86577		13.7854	0.865688		13.7854	0.857297		13.7854	0.887556		13.7854	0.859381
13.8599	0.907014		13.8599	0.894561		13.8599	0.888139		13.8599	0.879711		13.8599	0.86895		13.8599	0.87791		13.8599	0.866009		13.8599	0.855545		13.8599	0.862723		13.8599	0.858045		13.8599	0.875115		13.8599	0.866744		13.8599	0.866789		13.8599	0.856705		13.8599	0.886395		13.8599	0.860328
13.9344	0.907116		13.9344	0.893671		13.9344	0.890026		13.9344	0.881517		13.9344	0.868793		13.9344	0.877361		13.9344	0.864618		13.9344	0.854908		13.9344	0.863405		13.9344	0.858575		13.9344	0.875884		13.9344	0.864811		13.9344	0.867918		13.9344	0.856014		13.9344	0.887419		13.9344	0.860508
14.0089	0.907178		14.0089	0.894147		14.0089	0.889708		14.0089	0.880269		14.0089	0.868518		14.0089	0.877376		14.0089	0.864006		14.0089	0.852088		14.0089	0.863352		14.0089	0.860445		14.0089	0.876328		14.0089	0.865942		14.0089	0.866195		14.0089	0.857112		14.0089	0.888276		14.0089	0.857861
14.0834	0.907167		14.0834	0.894941		14.0834	0.890979		14.0834	0.881049		14.0834	0.867315		14.0834	0.878186		14.0834	0.865862		14.0834	0.855088		14.0834	0.863314		14.0834	0.858315		14.0834	0.875972		14.0834	0.864127		14.0834	0.865424		14.0834	0.857912		14.0834	0.888332		14.0834	0.859002
14.158	0.906804		14.158	0.895054		14.158	0.890925		14.158	0.879153		14.158	0.867762		14.158	0.877555		14.158	0.864755		14.158	0.85368		14.158	0.864389		14.158	0.857649		14.158	0.874397		14.158	0.866124		14.158	0.86424		14.158	0.856227		14.158	0.887835		14.158	0.859192
14.2325	0.906776		14.2325	0.895735		14.2325	0.889781		14.2325	0.877617		14.2325	0.867841		14.2325	0.877584		14.2325	0.864261		14.2325	0.854055		14.2325	0.864168		14.2325	0.85823		14.2325	0.874309		14.2325	0.864781		14.2325	0.865826		14.2325	0.856998		14.2325	0.887896		14.2325	0.859799
14.307	0.908154		14.307	0.893364		14.307	0.890348		14.307	0.877305		14.307	0.867522		14.307	0.874968		14.307	0.863188		14.307	0.851317		14.307	0.864509		14.307	0.858674		14.307	0.874826		14.307	0.864781		14.307	0.865628		14.307	0.856156		14.307	0.887718		14.307	0.857536
14.3815	0.90795		14.3815	0.894436		14.3815	0.889865		14.3815	0.876644		14.3815	0.86787		14.3815	0.877051		14.3815	0.862806		14.3815	0.852031		14.3815	0.863371		14.3815	0.858135		14.3815	0.875559		14.3815	0.864447		14.3815	0.866641		14.3815	0.855536		14.3815	0.887059		14.3815	0.85959
14.456	0.904428		14.456	0.894079		14.456	0.891448		14.456	0.876464		14.456	0.867399		14.456	0.877317		14.456	0.863056		14.456	0.850844		14.456	0.863391		14.456	0.858541		14.456	0.876003		14.456	0.864584		14.456	0.865727		14.456	0.855413		14.456	0.88823		14.456	0.858434
14.5305	0.908103		14.5305	0.894073		14.5305	0.890632		14.5305	0.875041		14.5305	0.865705		14.5305	0.87606		14.5305	0.862875		14.5305	0.850582		14.5305	0.862522		14.5305	0.857776		14.5305	0.876075		14.5305	0.863566		14.5305	0.865732		14.5305	0.857457		14.5305	0.887155		14.5305	0.858677
14.6051	0.907394		14.6051	0.894073		14.6051	0.891018		14.6051	0.876322		14.6051	0.866446		14.6051	0.876162		14.6051	0.86194		14.6051	0.852319		14.6051	0.863467		14.6051	0.856231		14.6051	0.875378		14.6051	0.864811		14.6051	0.866046		14.6051	0.855867		14.6051	0.88823		14.6051	0.858609
14.6796	0.906254		14.6796	0.893166		14.6796	0.891443		14.6796	0.87507		14.6796	0.866044		14.6796	0.876046		14.6796	0.862091		14.6796	0.851831		14.6796	0.86305		14.6796	0.857672		14.6796	0.874139		14.6796	0.862961		14.6796	0.865633		14.6796	0.856189		14.6796	0.888169		14.6796	0.858653
14.7541	0.908817		14.7541	0.893597		14.7541	0.89095		14.7541	0.874016		14.7541	0.86758		14.7541	0.875585		14.7541	0.861416		14.7541	0.852401		14.7541	0.863117		14.7541	0.856765		14.7541	0.875363		14.7541	0.861377		14.7541	0.866811		14.7541	0.854703		14.7541	0.887409		14.7541	0.858823
14.8286	0.906169		14.8286	0.893512		14.8286	0.89048		14.8286	0.874597		14.8286	0.86759		14.8286	0.874143		14.8286	0.861705		14.8286	0.851569		14.8286	0.864336		14.8286	0.85737		14.8286	0.873793		14.8286	0.862567		14.8286	0.865974		14.8286	0.855446		14.8286	0.886724		14.8286	0.857963
14.9031	0.90694		14.9031	0.893807		14.9031	0.890309		14.9031	0.874106		14.9031	0.865351		14.9031	0.873881		14.9031	0.861528		14.9031	0.848496		14.9031	0.862445		14.9031	0.857729		14.9031	0.874531		14.9031	0.861657		14.9031	0.86495		14.9031	0.854481		14.9031	0.886516		14.9031	0.858774
14.9776	0.907025		14.9776	0.894152		14.9776	0.891145		14.9776	0.87342		14.9776	0.866559		14.9776	0.875648		14.9776	0.860799		14.9776	0.852103		14.9776	0.86328		14.9776	0.856194		14.9776	0.875435		14.9776	0.860801		14.9776	0.864565		14.9776	0.854239		14.9776	0.887338		14.9776	0.857725
15.0522	0.909061		15.0522	0.894442		15.0522	0.890563		15.0522	0.873609		15.0522	0.866525		15.0522	0.874852		15.0522	0.86123		15.0522	0.85219		15.0522	0.864144		15.0522	0.856449		15.0522	0.874841		15.0522	0.861195		15.0522	0.865088		15.0522	0.853823		15.0522	0.888646		15.0522	0.859007
15.1267	0.906379		15.1267	0.893126		15.1267	0.892822		15.1267	0.873605		15.1267	0.865749		15.1267	0.873687		15.1267	0.861847		15.1267	0.852524		15.1267	0.862407		15.1267	0.856836		15.1267	0.875796		15.1267	0.86208		15.1267	0.866828		15.1267	0.85475		15.1267	0.887363		15.1267	0.856618
15.2012	0.906957		15.2012	0.895326		15.2012	0.891341		15.2012	0.871889		15.2012	0.865955		15.2012	0.873531		15.2012	0.860475		15.2012	0.85201		15.2012	0.862767		15.2012	0.856926		15.2012	0.875058		15.2012	0.862016		15.2012	0.864972		15.2012	0.853988		15.2012	0.88676		15.2012	0.857672
15.2757	0.90838		15.2757	0.894345		15.2757	0.892734		15.2757	0.872617		15.2757	0.866044		15.2757	0.872866		15.2757	0.860848		15.2757	0.852355		15.2757	0.86389		15.2757	0.85669		15.2757	0.875517		15.2757	0.861559		15.2757	0.8656		15.2757	0.854504		15.2757	0.88681		15.2757	0.857749
15.3502	0.905387		15.3502	0.89447		15.3502	0.892841		15.3502	0.871544		15.3502	0.863446		15.3502	0.872463		15.3502	0.861088		15.3502	0.851183		15.3502	0.863343		15.3502	0.857639		15.3502	0.875719		15.3502	0.860796		15.3502	0.866222		15.3502	0.853704		15.3502	0.88824		15.3502	0.856875
15.4247	0.90567		15.4247	0.893472		15.4247	0.891722		15.4247	0.871114		15.4247	0.865445		15.4247	0.872556		15.4247	0.85932		15.4247	0.848728		15.4247	0.863247		15.4247	0.856609		15.4247	0.876472		15.4247	0.861598		15.4247	0.86636		15.4247	0.854353		15.4247	0.885081		15.4247	0.858327
15.4992	0.907564		15.4992	0.894096		15.4992	0.893877		15.4992	0.871208		15.4992	0.865562		15.4992	0.872298		15.4992	0.860196		15.4992	0.850932		15.4992	0.863415		15.4992	0.858267		15.4992	0.87561		15.4992	0.860049		15.4992	0.865286		15.4992	0.855233		15.4992	0.886425		15.4992	0.857152
15.5738	0.907082		15.5738	0.893126		15.5738	0.892563		15.5738	0.870873		15.5738	0.866112		15.5738	0.871964		15.5738	0.859393		15.5738	0.850875		15.5738	0.863943		15.5738	0.857044		15.5738	0.876121		15.5738	0.859813		15.5738	0.866239		15.5738	0.854438		15.5738	0.886542		15.5738	0.856278
15.6483	0.905613		15.6483	0.893177		15.6483	0.894014		15.6483	0.871114		15.6483	0.865346		15.6483	0.872716		15.6483	0.86002		15.6483	0.849724		15.6483	0.862623		15.6483	0.856009		15.6483	0.876777		15.6483	0.861451		15.6483	0.865705		15.6483	0.8544		15.6483	0.887206		15.6483	0.857978
15.7228	0.906872		15.7228	0.892967		15.7228	0.894327		15.7228	0.870414		15.7228	0.866378		15.7228	0.872764		15.7228	0.860691		15.7228	0.850711		15.7228	0.863583		15.7228	0.856312		15.7228	0.876116		15.7228	0.860905		15.7228	0.865809		15.7228	0.853548		15.7228	0.886166		15.7228	0.857366
15.7973	0.906141		15.7973	0.892797		15.7973	0.893149		15.7973	0.870017		15.7973	0.864399		15.7973	0.872459		15.7973	0.860334		15.7973	0.849986		15.7973	0.865647		15.7973	0.856794		15.7973	0.876844		15.7973	0.859645		15.7973	0.865705		15.7973	0.853865		15.7973	0.887191		15.7973	0.857696
15.8718	0.906815		15.8718	0.894101		15.8718	0.893931		15.8718	0.869776		15.8718	0.864193		15.8718	0.8729		15.8718	0.858502		15.8718	0.848553		15.8718	0.864327		15.8718	0.857096		15.8718	0.877014		15.8718	0.860875		15.8718	0.866861		15.8718	0.853136		15.8718	0.886212		15.8718	0.858915
15.9463	0.907258		15.9463	0.893761		15.9463	0.893154		15.9463	0.869384		15.9463	0.864713		15.9463	0.871614		15.9463	0.860902		15.9463	0.850844		15.9463	0.863194		15.9463	0.857771		15.9463	0.876772		15.9463	0.860108		15.9463	0.866288		15.9463	0.854107		15.9463	0.886146		15.9463	0.857973
16.0209	0.907864		16.0209	0.893773		16.0209	0.892826		16.0209	0.869025		16.0209	0.86489		16.0209	0.870706		16.0209	0.859501		16.0209	0.848964		16.0209	0.862623		16.0209	0.857068		16.0209	0.876989		16.0209	0.860393		16.0209	0.865226		16.0209	0.853335		16.0209	0.887399		16.0209	0.857613
16.0954	0.907195		16.0954	0.895043		16.0954	0.894112		16.0954	0.868562		16.0954	0.864806		16.0954	0.871046		16.0954	0.859055		16.0954	0.849622		16.0954	0.862786		16.0954	0.857719		16.0954	0.877174		16.0954	0.860408		16.0954	0.866101		16.0954	0.852966		16.0954	0.887039		16.0954	0.857939
16.1699	0.906373		16.1699	0.893472		16.1699	0.893467		16.1699	0.868959		16.1699	0.863638		16.1699	0.871362		16.1699	0.8593		16.1699	0.849154		16.1699	0.86209		16.1699	0.857289		16.1699	0.877045		16.1699	0.859143		16.1699	0.865209		16.1699	0.852072		16.1699	0.884772		16.1699	0.85772
16.2444	0.90791		16.2444	0.893602		16.2444	0.893926		16.2444	0.867541		16.2444	0.864394		16.2444	0.870226		16.2444	0.8586		16.2444	0.850125		16.2444	0.861979		16.2444	0.858395		16.2444	0.875368		16.2444	0.861288		16.2444	0.864994		16.2444	0.853236		16.2444	0.886481		16.2444	0.856593
16.3189	0.908052		16.3189	0.893937		16.3189	0.892572		16.3189	0.869167		16.3189	0.865484		16.3189	0.870391		16.3189	0.859374		16.3189	0.848281		16.3189	0.861595		16.3189	0.857445		16.3189	0.877742		16.3189	0.862469		16.3189	0.866949		16.3189	0.85193		16.3189	0.886384		16.3189	0.858395
16.3934	0.906271		16.3934	0.893818		16.3934	0.892782		16.3934	0.868113		16.3934	0.864954		16.3934	0.872362		16.3934	0.858492		16.3934	0.849354		16.3934	0.862997		16.3934	0.857554		16.3934	0.877216		16.3934	0.860427		16.3934	0.866206		16.3934	0.853387		16.3934	0.886024		16.3934	0.857317
16.4679	0.905976		16.4679	0.893211		16.4679	0.892558		16.4679	0.868822		16.4679	0.86459		16.4679	0.871488		16.4679	0.858933		16.4679	0.849329		16.4679	0.863784		16.4679	0.85959		16.4679	0.877975		16.4679	0.86028		16.4679	0.864846		16.4679	0.852777		16.4679	0.885289		16.4679	0.856938
16.5425	0.905222		16.5425	0.89409		16.5425	0.893222		16.5425	0.868689		16.5425	0.864865		16.5425	0.871192		16.5425	0.859751		16.5425	0.848707		16.5425	0.86341		16.5425	0.858886		16.5425	0.877835		16.5425	0.859749		16.5425	0.865061		16.5425	0.853425		16.5425	0.886547		16.5425	0.858167
16.617	0.906141		16.617	0.893166		16.617	0.892445		16.617	0.868996		16.617	0.865602		16.617	0.871624		16.617	0.859658		16.617	0.848255		16.617	0.862272		16.617	0.859122		16.617	0.877944		16.617	0.860575		16.617	0.865457		16.617	0.853018		16.617	0.886881		16.617	0.857443
16.6915	0.905965		16.6915	0.893999		16.6915	0.894376		16.6915	0.868486		16.6915	0.865788		16.6915	0.869978		16.6915	0.858747		16.6915	0.848394		16.6915	0.863079		16.6915	0.857908		16.6915	0.878176		16.6915	0.860737		16.6915	0.86473		16.6915	0.852914		16.6915	0.885619		16.6915	0.856933
16.766	0.907717		16.766	0.893568		16.766	0.892607		16.766	0.867687		16.766	0.864409		16.766	0.869435		16.766	0.859242		16.766	0.847274		16.766	0.861686		16.766	0.859486		16.766	0.877417		16.766	0.860157		16.766	0.865501		16.766	0.853004		16.766	0.885324		16.766	0.857948
16.8405	0.905687		16.8405	0.893126		16.8405	0.894728		16.8405	0.867309		16.8405	0.864202		16.8405	0.871983		16.8405	0.858815		16.8405	0.848995		16.8405	0.86244		16.8405	0.858589		16.8405	0.879327		16.8405	0.861077		16.8405	0.86527		16.8405	0.850789		16.8405	0.885385		16.8405	0.857152
16.915	0.906725		16.915	0.893013		16.915	0.893159		16.915	0.866378		16.915	0.864634		16.915	0.870716		16.915	0.859663		16.915	0.84845		16.915	0.862565		16.915	0.857979		16.915	0.878728		16.915	0.86086		16.915	0.866051		16.915	0.85157		16.915	0.883976		16.915	0.858352
16.9896	0.908312		16.9896	0.891062		16.9896	0.893667		16.9896	0.868259		16.9896	0.864413		16.9896	0.869439		16.9896	0.85859		16.9896	0.848157		16.9896	0.862536		16.9896	0.859359		16.9896	0.877422		16.9896	0.860137		16.9896	0.86614		16.9896	0.851735		16.9896	0.884194		16.9896	0.858216
17.0641	0.906214		17.0641	0.893421		17.0641	0.893257		17.0641	0.867262		17.0641	0.865671		17.0641	0.870493		17.0641	0.860143		17.0641	0.848003		17.0641	0.862791		17.0641	0.859387		17.0641	0.879214		17.0641	0.860772		17.0641	0.86538		17.0641	0.852824		17.0641	0.884792		17.0641	0.857837
17.1386	0.906475		17.1386	0.892911		17.1386	0.892176		17.1386	0.867734		17.1386	0.865548		17.1386	0.871667		17.1386	0.859878		17.1386	0.84918		17.1386	0.863362		17.1386	0.858575		17.1386	0.878697		17.1386	0.861052		17.1386	0.865782		17.1386	0.85326		17.1386	0.884569		17.1386	0.85754
17.2131	0.906532		17.2131	0.893115		17.2131	0.893921		17.2131	0.866846		17.2131	0.86705		17.2131	0.871109		17.2131	0.858997		17.2131	0.848008		17.2131	0.862219		17.2131	0.858919		17.2131	0.878305		17.2131	0.862257		17.2131	0.86544		17.2131	0.852218		17.2131	0.88431		17.2131	0.85603
17.2876	0.905846		17.2876	0.892599		17.2876	0.892005		17.2876	0.867498		17.2876	0.865685		17.2876	0.870837		17.2876	0.859526		17.2876	0.847176		17.2876	0.861758		17.2876	0.859208		17.2876	0.878315		17.2876	0.86055		17.2876	0.866486		17.2876	0.851911		17.2876	0.884655		17.2876	0.856778
17.3621	0.90499		17.3621	0.892355		17.3621	0.893369		17.3621	0.865962		17.3621	0.866206		17.3621	0.871731		17.3621	0.858899		17.3621	0.848214		17.3621	0.860889		17.3621	0.858967		17.3621	0.87767		17.3621	0.857835		17.3621	0.865694		17.3621	0.852602		17.3621	0.884812		17.3621	0.857176
17.4366	0.906385		17.4366	0.893693		17.4366	0.891952		17.4366	0.865976		17.4366	0.866014		17.4366	0.872682		17.4366	0.860348		17.4366	0.848121		17.4366	0.861893		17.4366	0.860275		17.4366	0.877469		17.4366	0.859926		17.4366	0.864681		17.4366	0.852933		17.4366	0.884386		17.4366	0.858303
17.5112	0.90749		17.5112	0.89303		17.5112	0.893912		17.5112	0.866558		17.5112	0.866662		17.5112	0.871959		17.5112	0.857826		17.5112	0.847448		17.5112	0.860371		17.5112	0.85993		17.5112	0.878238		17.5112	0.859453		17.5112	0.865897		17.5112	0.852029		17.5112	0.883048		17.5112	0.858259
17.5857	0.907246		17.5857	0.893103		17.5857	0.892269		17.5857	0.865872		17.5857	0.865243		17.5857	0.87092		17.5857	0.859388		17.5857	0.848476		17.5857	0.861072		17.5857	0.858678		17.5857	0.87864		17.5857	0.860536		17.5857	0.866393		17.5857	0.851811		17.5857	0.883337		17.5857	0.858288
17.6602	0.906492		17.6602	0.89498		17.6602	0.892592		17.6602	0.86573		17.6602	0.865646		17.6602	0.870964		17.6602	0.858385		17.6602	0.847325		17.6602	0.862522		17.6602	0.859505		17.6602	0.877345		17.6602	0.859822		17.6602	0.864675		17.6602	0.851622		17.6602	0.884351		17.6602	0.856831
17.7347	0.906169		17.7347	0.895423		17.7347	0.891986		17.7347	0.864558		17.7347	0.865636		17.7347	0.870221		17.7347	0.85981		17.7347	0.849709		17.7347	0.862325		17.7347	0.858452		17.7347	0.878243		17.7347	0.860078		17.7347	0.865727		17.7347	0.85271		17.7347	0.883813		17.7347	0.858046
17.8092	0.906566		17.8092	0.894362		17.8092	0.891634		17.8092	0.865395		17.8092	0.867733		17.8092	0.870813		17.8092	0.85885		17.8092	0.849298		17.8092	0.861029		17.8092	0.857899		17.8092	0.87783		17.8092	0.860172		17.8092	0.864747		17.8092	0.852038		17.8092	0.884006		17.8092	0.857225
17.8837	0.906918		17.8837	0.893381		17.8837	0.891937		17.8837	0.864766		17.8837	0.866328		17.8837	0.870425		17.8837	0.858644		17.8837	0.848466		17.8837	0.861907		17.8837	0.858461		17.8837	0.877742		17.8837	0.861406		17.8837	0.86348		17.8837	0.853761		17.8837	0.883042		17.8837	0.858157
17.9583	0.906787		17.9583	0.893483		17.9583	0.891859		17.9583	0.865782		17.9583	0.866049		17.9583	0.870371		17.9583	0.857954		17.9583	0.84768		17.9583	0.861917		17.9583	0.858575		17.9583	0.878661		17.9583	0.857968		17.9583	0.864697		17.9583	0.851811		17.9583	0.88251		17.9583	0.859109
18.0328	0.906606		18.0328	0.89354		18.0328	0.891795		18.0328	0.863608		18.0328	0.866942		18.0328	0.870046		18.0328	0.858576		18.0328	0.848717		18.0328	0.861739		18.0328	0.858745		18.0328	0.877241		18.0328	0.860132		18.0328	0.864284		18.0328	0.852417		18.0328	0.881435		18.0328	0.858735
18.1073	0.906787		18.1073	0.894782		18.1073	0.891937		18.1073	0.86617		18.1073	0.865425		18.1073	0.868498		18.1073	0.857312		18.1073	0.847638		18.1073	0.862541		18.1073	0.858707		18.1073	0.878341		18.1073	0.859926		18.1073	0.864499		18.1073	0.851243		18.1073	0.883225		18.1073	0.859401
18.1818	0.905908		18.1818	0.894334		18.1818	0.892597		18.1818	0.86513		18.1818	0.867232		18.1818	0.869857		18.1818	0.859692		18.1818	0.847695		18.1818	0.864063		18.1818	0.858962		18.1818	0.878351		18.1818	0.858834		18.1818	0.864581		18.1818	0.851721		18.1818	0.882094		18.1818	0.858939
18.2563	0.9066		18.2563	0.894912		18.2563	0.891717		18.2563	0.864776		18.2563	0.866765		18.2563	0.871444		18.2563	0.857327		18.2563	0.847135		18.2563	0.861792		18.2563	0.858924		18.2563	0.878754		18.2563	0.860816		18.2563	0.8644		18.2563	0.852067		18.2563	0.882211		18.2563	0.858915
18.3308	0.90571		18.3308	0.893846		18.3308	0.89157		18.3308	0.864577		18.3308	0.866211		18.3308	0.870308		18.3308	0.856823		18.3308	0.847551		18.3308	0.863074		18.3308	0.858343		18.3308	0.878801		18.3308	0.861372		18.3308	0.865132		18.3308	0.851745		18.3308	0.883124		18.3308	0.859517
18.4054	0.906419		18.4054	0.894328		18.4054	0.893149		18.4054	0.863561		18.4054	0.866152		18.4054	0.871303		18.4054	0.856259		18.4054	0.847438		18.4054	0.86316		18.4054	0.858891		18.4054	0.879802		18.4054	0.860039		18.4054	0.864202		18.4054	0.852161		18.4054	0.881886		18.4054	0.860882
18.4799	0.906713		18.4799	0.893614		18.4799	0.8931		18.4799	0.865986		18.4799	0.867728		18.4799	0.869949		18.4799	0.856769		18.4799	0.846215		18.4799	0.862675		18.4799	0.859066		18.4799	0.87831		18.4799	0.860708		18.4799	0.864042		18.4799	0.852114		18.4799	0.882216		18.4799	0.859575
18.5544	0.90592		18.5544	0.892604		18.5544	0.892651		18.5544	0.864946		18.5544	0.86681		18.5544	0.870473		18.5544	0.857121		18.5544	0.846883		18.5544	0.863021		18.5544	0.858192		18.5544	0.877556		18.5544	0.86086		18.5544	0.863866		18.5544	0.852426		18.5544	0.881901		18.5544	0.858968
18.6289	0.905982		18.6289	0.894345		18.6289	0.892934		18.6289	0.865092		18.6289	0.866235		18.6289	0.871328		18.6289	0.855701		18.6289	0.847387		18.6289	0.862219		18.6289	0.858438		18.6289	0.879642		18.6289	0.860241		18.6289	0.865005		18.6289	0.852914		18.6289	0.880902		18.6289	0.860134
18.7034	0.907235		18.7034	0.892542		18.7034	0.893369		18.7034	0.864294		18.7034	0.8657		18.7034	0.871823		18.7034	0.855016		18.7034	0.8464		18.7034	0.862685		18.7034	0.859373		18.7034	0.878646		18.7034	0.859286		18.7034	0.863464		18.7034	0.851456		18.7034	0.880644		18.7034	0.858614
18.7779	0.906027		18.7779	0.894612		18.7779	0.892328		18.7779	0.864251		18.7779	0.866058		18.7779	0.870342		18.7779	0.855706		18.7779	0.845964		18.7779	0.863506		18.7779	0.858031		18.7779	0.878677		18.7779	0.859936		18.7779	0.864036		18.7779	0.853572		18.7779	0.880202		18.7779	0.859367
18.8524	0.90639		18.8524	0.894357		18.8524	0.892631		18.8524	0.863552		18.8524	0.86514		18.8524	0.869022		18.8524	0.855021		18.8524	0.846688		18.8524	0.863199		18.8524	0.858768		18.8524	0.879838		18.8524	0.859734		18.8524	0.864169		18.8524	0.853416		18.8524	0.879513		18.8524	0.859104
18.927	0.905421		18.927	0.894476		18.927	0.891253		18.927	0.862814		18.927	0.864684		18.927	0.86994		18.927	0.85505		18.927	0.84771		18.927	0.863343		18.927	0.858801		18.927	0.879255		18.927	0.859084		18.927	0.863728		18.927	0.851982		18.927	0.879538		18.927	0.859697
19.0015	0.906288		19.0015	0.894617		19.0015	0.891761		19.0015	0.86478		19.0015	0.867389		19.0015	0.869061		19.0015	0.85361		19.0015	0.847577		19.0015	0.864778		19.0015	0.859156		19.0015	0.879962		19.0015	0.860118		19.0015	0.865011		19.0015	0.85449		19.0015	0.879579		19.0015	0.860819
19.076	0.906373		19.076	0.8935		19.076	0.89396		19.076	0.864483		19.076	0.864963		19.076	0.869415		19.076	0.852944		19.076	0.845239		19.076	0.863511		19.076	0.859174		19.076	0.880318		19.076	0.859591		19.076	0.863987		19.076	0.852048		19.076	0.879285		19.076	0.859129
19.1505	0.905976		19.1505	0.893863		19.1505	0.891932		19.1505	0.863835		19.1505	0.865847		19.1505	0.870211		19.1505	0.852812		19.1505	0.846508		19.1505	0.863021		19.1505	0.858853		19.1505	0.878418		19.1505	0.858912		19.1505	0.865104		19.1505	0.851811		19.1505	0.880106		19.1505	0.860187
19.225	0.906356		19.225	0.894476		19.225	0.893677		19.225	0.865404		19.225	0.864065		19.225	0.870774		19.225	0.852127		19.225	0.845018		19.225	0.863804		19.225	0.859963		19.225	0.879534		19.225	0.8609		19.225	0.863761		19.225	0.851996		19.225	0.879645		19.225	0.859245
19.2995	0.907366		19.2995	0.894986		19.2995	0.89182		19.2995	0.865792		19.2995	0.86486		19.2995	0.869211		19.2995	0.852842		19.2995	0.846996		19.2995	0.865181		19.2995	0.858253		19.2995	0.879513		19.2995	0.859281		19.2995	0.86348		19.2995	0.851546		19.2995	0.878488		19.2995	0.860527
19.3741	0.907502		19.3741	0.89599		19.3741	0.892167		19.3741	0.864506		19.3741	0.864978		19.3741	0.870177		19.3741	0.851093		19.3741	0.845409		19.3741	0.864264		19.3741	0.858003		19.3741	0.880628		19.3741	0.859114		19.3741	0.86359		19.3741	0.85262		19.3741	0.880005		19.3741	0.85941
19.4486	0.908159		19.4486	0.894952		19.4486	0.892069		19.4486	0.864771		19.4486	0.864207		19.4486	0.869639		19.4486	0.850442		19.4486	0.84582		19.4486	0.863957		19.4486	0.85873		19.4486	0.880401		19.4486	0.860295		19.4486	0.864763		19.4486	0.852976		19.4486	0.879001		19.4486	0.858915
19.5231	0.906532		19.5231	0.893387		19.5231	0.891214		19.5231	0.863396		19.5231	0.864443		19.5231	0.86942		19.5231	0.851534		19.5231	0.845563		19.5231	0.863151		19.5231	0.858159		19.5231	0.880009		19.5231	0.858804		19.5231	0.863613		19.5231	0.8521		19.5231	0.877469		19.5231	0.859585
19.5976	0.905647		19.5976	0.894561		19.5976	0.891077		19.5976	0.863996		19.5976	0.864227		19.5976	0.86908		19.5976	0.851025		19.5976	0.845501		19.5976	0.864591		19.5976	0.857323		19.5976	0.879828		19.5976	0.858386		19.5976	0.862787		19.5976	0.852109		19.5976	0.877063		19.5976	0.859206
19.6721	0.908936		19.6721	0.893676		19.6721	0.890104		19.6721	0.862918		19.6721	0.864134		19.6721	0.869813		19.6721	0.85057		19.6721	0.845666		19.6721	0.863491		19.6721	0.857271		19.6721	0.880809		19.6721	0.859985		19.6721	0.861977		19.6721	0.852138		19.6721	0.876962		19.6721	0.860309
19.7466	0.905886		19.7466	0.894504		19.7466	0.891443		19.7466	0.863831		19.7466	0.86458		19.7466	0.870221		19.7466	0.850344		19.7466	0.845167		19.7466	0.864735		19.7466	0.856921		19.7466	0.880638		19.7466	0.859503		19.7466	0.863282		19.7466	0.8528		19.7466	0.87684		19.7466	0.859828
19.8211	0.904377		19.8211	0.892236		19.8211	0.892064		19.8211	0.865201		19.8211	0.864482		19.8211	0.870619		19.8211	0.85171		19.8211	0.847037		19.8211	0.863957		19.8211	0.85677		19.8211	0.880504		19.8211	0.859173		19.8211	0.861999		19.8211	0.852573		19.8211	0.875608		19.8211	0.860882
19.8957	0.907105		19.8957	0.894101		19.8957	0.891785		19.8957	0.863017		19.8957	0.863554		19.8957	0.869435		19.8957	0.849575		19.8957	0.845553		19.8957	0.864212		19.8957	0.858754		19.8957	0.881511		19.8957	0.859906		19.8957	0.863992		19.8957	0.85369		19.8957	0.877363		19.8957	0.861178
19.9702	0.905914		19.9702	0.893489		19.9702	0.892479		19.9702	0.863226		19.9702	0.864428		19.9702	0.869964		19.9702	0.851089		19.9702	0.845398		19.9702	0.866962		19.9702	0.856642		19.9702	0.880731		19.9702	0.859335		19.9702	0.861702		19.9702	0.8536		19.9702	0.877449		19.9702	0.860998
20.0447	0.90626		20.0447	0.893534		20.0447	0.891165		20.0447	0.863726		20.0447	0.863918		20.0447	0.868614		20.0447	0.850428		20.0447	0.846046		20.0447	0.863943		20.0447	0.857672		20.0447	0.878377		20.0447	0.859414		20.0447	0.863855		20.0447	0.850917		20.0447	0.876003		20.0447	0.86009
20.1192	0.906651		20.1192	0.893619		20.1192	0.890779		20.1192	0.863698		20.1192	0.864669		20.1192	0.869988		20.1192	0.850971		20.1192	0.845887		20.1192	0.866502		20.1192	0.856709		20.1192	0.880607		20.1192	0.858725		20.1192	0.863398		20.1192	0.851258		20.1192	0.878478		20.1192	0.861358
20.1937	0.906521		20.1937	0.893291		20.1937	0.891653		20.1937	0.863259		20.1937	0.863255		20.1937	0.870017		20.1937	0.850751		20.1937	0.846775		20.1937	0.865426		20.1937	0.855693		20.1937	0.880907		20.1937	0.857919		20.1937	0.861509		20.1937	0.850671		20.1937	0.877378		20.1937	0.860474
20.2682	0.90588		20.2682	0.894629		20.2682	0.891204		20.2682	0.863452		20.2682	0.863392		20.2682	0.868614		20.2682	0.849972		20.2682	0.847202		20.2682	0.865296		20.2682	0.856042		20.2682	0.879797		20.2682	0.857909		20.2682	0.862627		20.2682	0.850983		20.2682	0.877337		20.2682	0.860047
20.3428	0.905137		20.3428	0.892984		20.3428	0.892274		20.3428	0.863523		20.3428	0.86487		20.3428	0.868294		20.3428	0.849189		20.3428	0.846724		20.3428	0.865882		20.3428	0.856179		20.3428	0.880912		20.3428	0.858278		20.3428	0.862082		20.3428	0.853099		20.3428	0.875075		20.3428	0.861285
20.4173	0.90829		20.4173	0.893217		20.4173	0.891204		20.4173	0.86323		20.4173	0.863358		20.4173	0.869813		20.4173	0.851064		20.4173	0.846791		20.4173	0.865585		20.4173	0.856888		20.4173	0.88021		20.4173	0.858893		20.4173	0.862396		20.4173	0.851598		20.4173	0.875654		20.4173	0.860333
20.4918	0.906447		20.4918	0.894323		20.4918	0.891864		20.4918	0.862975		20.4918	0.863107		20.4918	0.868561		20.4918	0.850995		20.4918	0.846323		20.4918	0.864754		20.4918	0.855603		20.4918	0.879967		20.4918	0.858292		20.4918	0.862258		20.4918	0.852114		20.4918	0.875466		20.4918	0.861673
20.5663	0.905659		20.5663	0.891607		20.5663	0.890754		20.5663	0.863859		20.5663	0.864536		20.5663	0.86876		20.5663	0.847989		20.5663	0.845696		20.5663	0.86366		20.5663	0.854899		20.5663	0.881289		20.5663	0.857874		20.5663	0.861526		20.5663	0.852251		20.5663	0.87538		20.5663	0.859993
20.6408	0.906974		20.6408	0.891913		20.6408	0.890783		20.6408	0.862309		20.6408	0.863711		20.6408	0.869032		20.6408	0.85199		20.6408	0.846606		20.6408	0.864792		20.6408	0.856165		20.6408	0.879038		20.6408	0.859601		20.6408	0.863425		20.6408	0.851243		20.6408	0.874482		20.6408	0.862208
20.7153	0.905353		20.7153	0.892786		20.7153	0.890857		20.7153	0.862852		20.7153	0.862749		20.7153	0.868372		20.7153	0.8508		20.7153	0.845866		20.7153	0.86545		20.7153	0.853737		20.7153	0.878191		20.7153	0.859665		20.7153	0.863222		20.7153	0.851485		20.7153	0.875699		20.7153	0.859978
20.7899	0.905829		20.7899	0.893705		20.7899	0.891507		20.7899	0.863878		20.7899	0.862754		20.7899	0.869202		20.7899	0.849605		20.7899	0.846159		20.7899	0.863559		20.7899	0.853869		20.7899	0.879348		20.7899	0.85875		20.7899	0.862985		20.7899	0.851745		20.7899	0.874152		20.7899	0.860522
20.8644	0.906146		20.8644	0.894084		20.8644	0.891292		20.8644	0.862455		20.8644	0.863839		20.8644	0.868677		20.8644	0.848909		20.8644	0.846036		20.8644	0.864375		20.8644	0.85454		20.8644	0.878584		20.8644	0.856084		20.8644	0.864504		20.8644	0.851925		20.8644	0.875806		20.8644	0.861921
20.9389	0.906022		20.9389	0.893863		20.9389	0.890959		20.9389	0.862611		20.9389	0.862965		20.9389	0.870478		20.9389	0.850604		20.9389	0.846801		20.9389	0.863703		20.9389	0.854238		20.9389	0.878553		20.9389	0.85843		20.9389	0.863007		20.9389	0.851418		20.9389	0.876642		20.9389	0.861989
21.0134	0.907411		21.0134	0.891794		21.0134	0.891287		21.0134	0.86315		21.0134	0.862405		21.0134	0.869003		21.0134	0.850589		21.0134	0.844818		21.0134	0.863213		21.0134	0.854271		21.0134	0.878129		21.0134	0.85811		21.0134	0.863172		21.0134	0.851092		21.0134	0.876759		21.0134	0.862188
21.0879	0.911771		21.0879	0.898235		21.0879	0.897875		21.0879	0.869322		21.0879	0.86759		21.0879	0.873585		21.0879	0.854879		21.0879	0.850228		21.0879	0.86907		21.0879	0.859949		21.0879	0.883637		21.0879	0.862208		21.0879	0.866998		21.0879	0.855342		21.0879	0.880847		21.0879	0.86655
21.1624	0.920231		21.1624	0.908102		21.1624	0.907485		21.1624	0.878194		21.1624	0.878457		21.1624	0.881142		21.1624	0.86476		21.1624	0.859974		21.1624	0.879065		21.1624	0.867546		21.1624	0.894225		21.1624	0.872096		21.1624	0.876644		21.1624	0.865148		21.1624	0.890538		21.1624	0.874126
21.2369	0.924938		21.2369	0.91308		21.2369	0.912074		21.2369	0.88509		21.2369	0.881805		21.2369	0.88887		21.2369	0.869902		21.2369	0.864007		21.2369	0.884365		21.2369	0.875685		21.2369	0.899026		21.2369	0.876823		21.2369	0.883047		21.2369	0.871296		21.2369	0.894696		21.2369	0.882057
21.3115	0.92978		21.3115	0.91532		21.3115	0.91593		21.3115	0.88673		21.3115	0.886465		21.3115	0.892539		21.3115	0.87401		21.3115	0.86916		21.3115	0.886496		21.3115	0.878161		21.3115	0.902314		21.3115	0.879554		21.3115	0.888398		21.3115	0.874122		21.3115	0.898819		21.3115	0.884305
21.386	0.930461		21.386	0.920134		21.386	0.919391		21.386	0.890204		21.386	0.889745		21.386	0.895068		21.386	0.876507		21.386	0.870475		21.386	0.892099		21.386	0.881189		21.386	0.906165		21.386	0.883273		21.386	0.889676		21.386	0.878353		21.386	0.901096		21.386	0.88905
21.4605	0.933335		21.4605	0.921274		21.4605	0.921224		21.4605	0.893583		21.4605	0.893447		21.4605	0.897262		21.4605	0.880239		21.4605	0.874574		21.4605	0.894571		21.4605	0.883867		21.4605	0.90807		21.4605	0.885905		21.4605	0.892841		21.4605	0.881178		21.4605	0.904956		21.4605	0.892994
21.535	0.934328		21.535	0.923882		21.535	0.924122		21.535	0.895587		21.535	0.894277		21.535	0.900791		21.535	0.883132		21.535	0.876768		21.535	0.896126		21.535	0.886631		21.535	0.910641		21.535	0.889387		21.535	0.894669		21.535	0.883161		21.535	0.906944		21.535	0.893042
21.6095	0.936103		21.6095	0.925901		21.6095	0.925921		21.6095	0.897393		21.6095	0.896246		21.6095	0.902835		21.6095	0.885395		21.6095	0.878268		21.6095	0.897106		21.6095	0.888606		21.6095	0.912045		21.6095	0.890957		21.6095	0.897229		21.6095	0.885504		21.6095	0.908906		21.6095	0.89566
21.684	0.938773		21.684	0.926649		21.684	0.926346		21.684	0.898607		21.684	0.900046		21.684	0.905072		21.684	0.886619		21.684	0.880909		21.684	0.899578		21.684	0.892744		21.684	0.91493		21.684	0.892359		21.684	0.899976		21.684	0.889399		21.684	0.909961		21.684	0.897685
21.7586	0.940684		21.7586	0.927313		21.7586	0.927959		21.7586	0.900739		21.7586	0.90123		21.7586	0.907242		21.7586	0.88848		21.7586	0.88281		21.7586	0.901969		21.7586	0.892503		21.7586	0.917021		21.7586	0.89472		21.7586	0.90045		21.7586	0.890421		21.7586	0.913024		21.7586	0.899142
21.8331	0.941075		21.8331	0.930936		21.8331	0.93029		21.8331	0.901679		21.8331	0.902487		21.8331	0.908572		21.8331	0.890673		21.8331	0.884392		21.8331	0.904619		21.8331	0.894364		21.8331	0.918389		21.8331	0.896402		21.8331	0.90334		21.8331	0.890464		21.8331	0.915377		21.8331	0.900998
