# Supplementary figures and images for: Targeting the BAG2/CHIP axis promotes gastric cancer apoptosis by blocking apoptosome assembly
Source: Frontiers journal article supplement (doi:10.3389/fimmu.2025.1578416), 2025-07-18

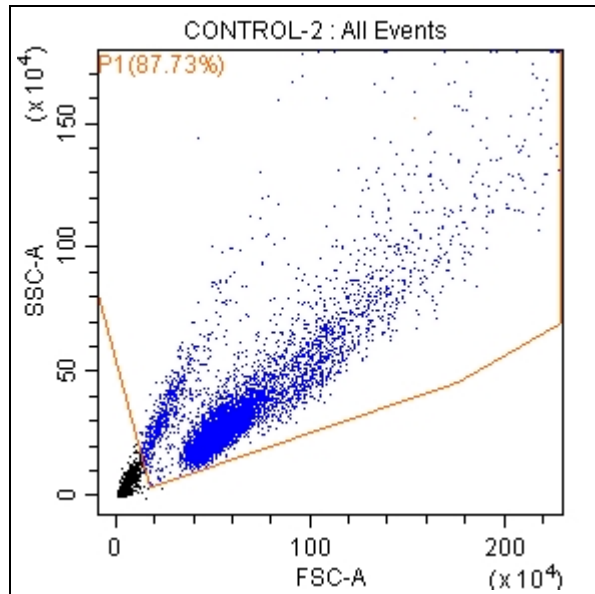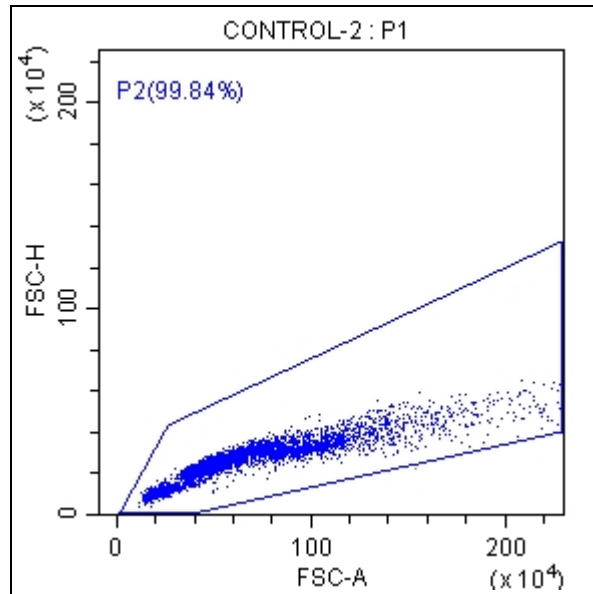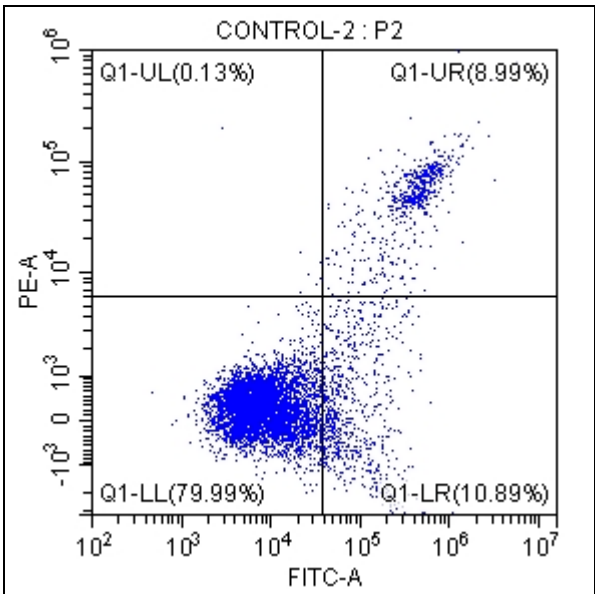

试管名称: CONTROL-2

样本ID:

| 群体             | 颗粒数  | %总数     | %父群     |
|----------------|------|---------|---------|
| ▼ ● All Events | 7139 | 100.00% | 100.00% |
| ▼ ● P1         | 6263 | 87.73%  | 87.73%  |
| ▼ ● P2         | 6253 | 87.59%  | 99.84%  |
| ⊗ Q1-UR        | 562  | 7.87%   | 8.99%   |
| ⊗ Q1-UL        | 8    | 0.11%   | 0.13%   |
| ⊗ Q1-LL        | 5002 | 70.07%  | 79.99%  |
| ⊗ Q1-LR        | 681  | 9.54%   | 10.89%  |

Supplement: Data_Sheet_1.zip [file Data_Sheet_1.zip]

# BD FACSDiva 8.0.2

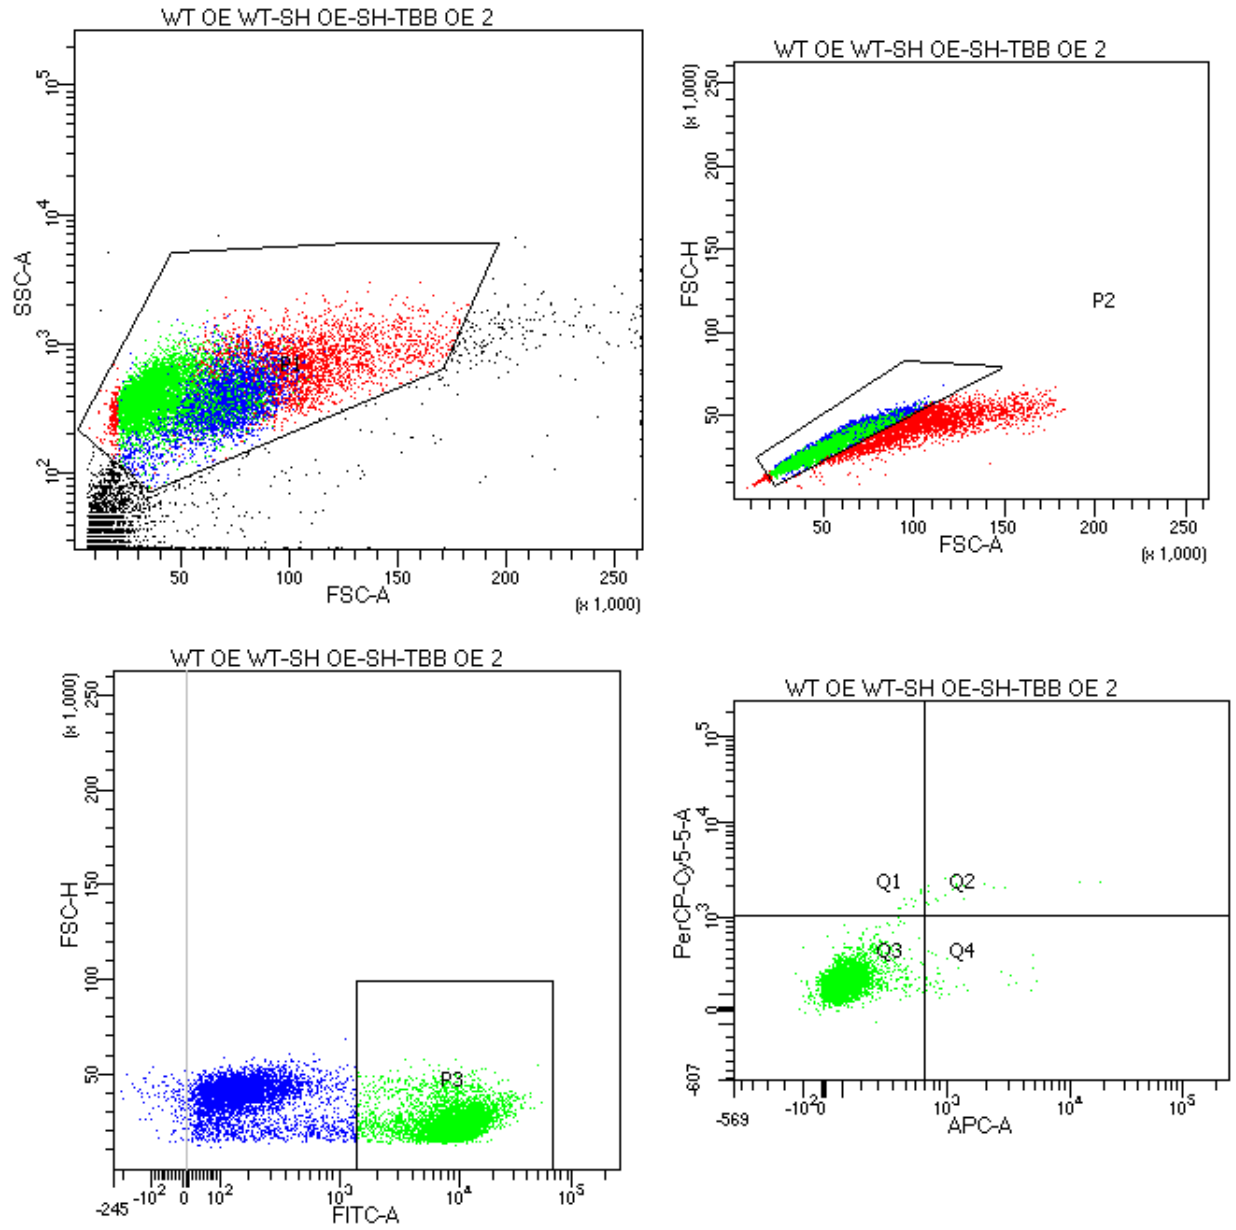

| Tube: TBB OE 2 |         |         |        |
|----------------|---------|---------|--------|
| Population     | #Events | %Parent | %Total |
| ■ All Events   | 17,331  | ####    | 100.0  |
| ■ P1           | 13,153  | 75.9    | 75.9   |
| ■ P2           | 10,000  | 76.0    | 57.7   |
| ■ P3           | 5,437   | 54.4    | 31.4   |
| ☒ Q1           | 12      | 0.2     | 0.1    |
| ☒ Q2           | 21      | 0.4     | 0.1    |
| ☒ Q3           | 5,367   | 98.7    | 31.0   |
| ☒ Q4           | 37      | 0.7     | 0.2    |

Supplement: Data_Sheet_1.zip [file Data_Sheet_1.zip]

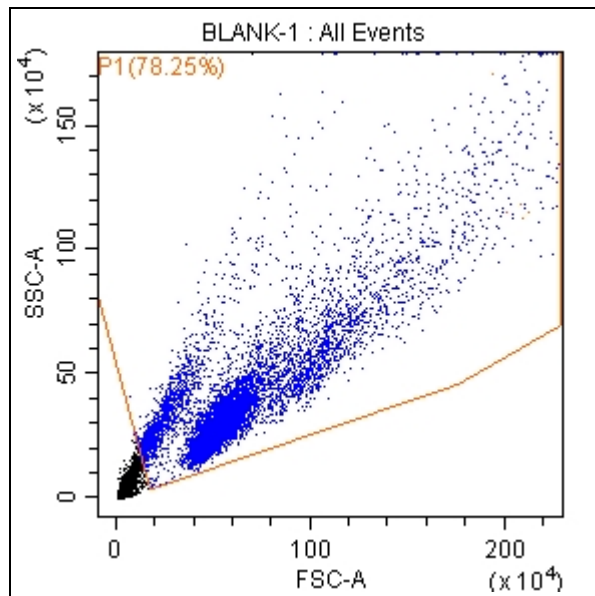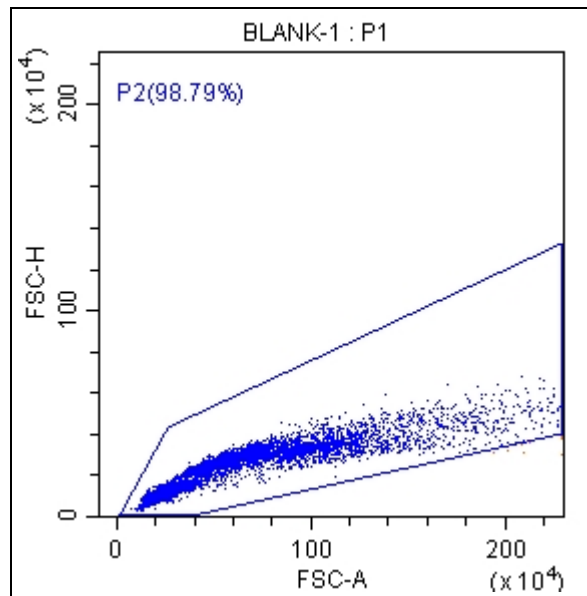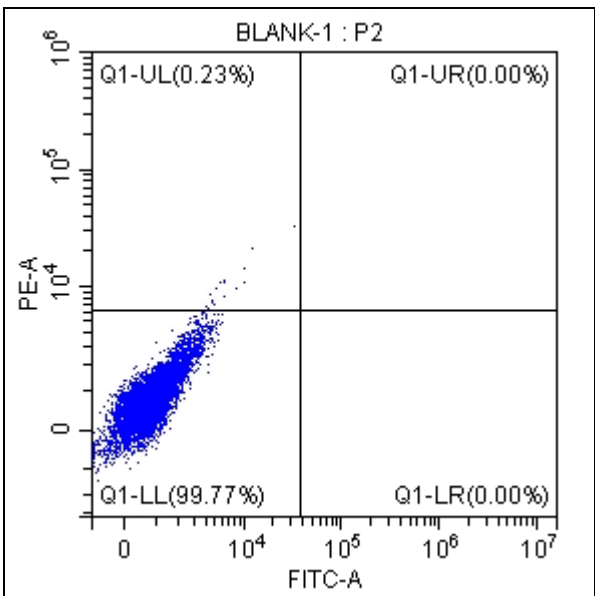

试管名称: BLANK-1

样本ID:

| 群体             | 颗粒数   | %总数     | %父群     |
|----------------|-------|---------|---------|
| ▼ ● All Events | 10000 | 100.00% | 100.00% |
| ▼ ● P1         | 7825  | 78.25%  | 78.25%  |
| ▼ ● P2         | 7730  | 77.30%  | 98.79%  |
| ⊗ Q1-UR        | 0     | 0.00%   | 0.00%   |
| ⊗ Q1-UL        | 18    | 0.18%   | 0.23%   |
| ⊗ Q1-LL        | 7712  | 77.12%  | 99.77%  |
| ⊗ Q1-LR        | 0     | 0.00%   | 0.00%   |

Supplement: Data_Sheet_1.zip [file Data_Sheet_1.zip]

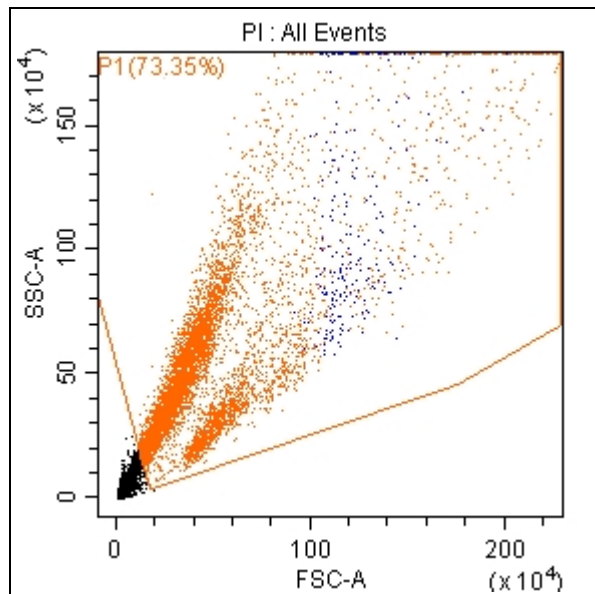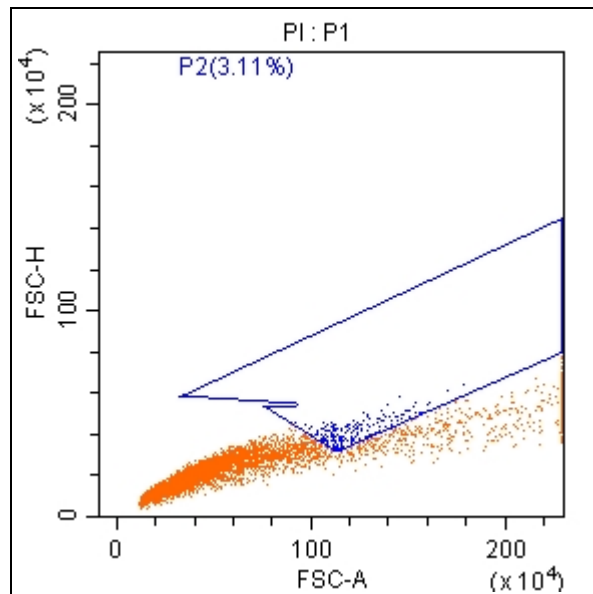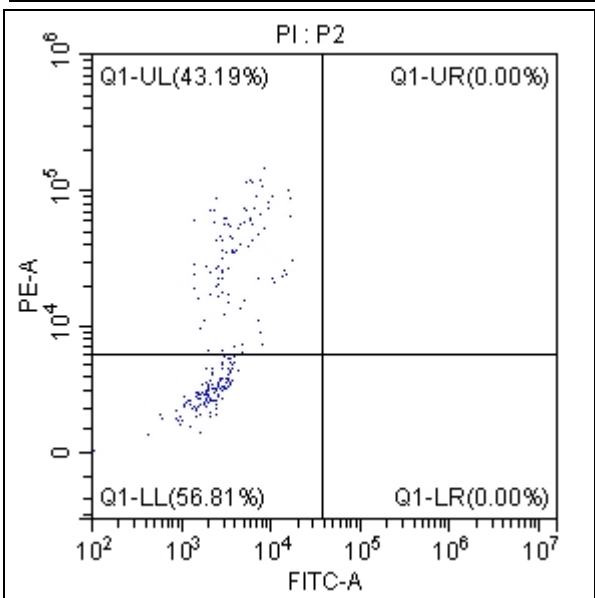

试管名称: PI

样本ID:

| 群体             | 颗粒数  | %总数     | %父群     |
|----------------|------|---------|---------|
| ▼ ● All Events | 9348 | 100.00% | 100.00% |
| ▼ ● P1         | 6857 | 73.35%  | 73.35%  |
| ▼ ● P2         | 213  | 2.28%   | 3.11%   |
| ⊗ Q1-UR        | 0    | 0.00%   | 0.00%   |
| ⊗ Q1-UL        | 92   | 0.98%   | 43.19%  |
| ⊗ Q1-LL        | 121  | 1.29%   | 56.81%  |
| ⊗ Q1-LR        | 0    | 0.00%   | 0.00%   |

Supplement: Data_Sheet_1.zip [file Data_Sheet_1.zip]

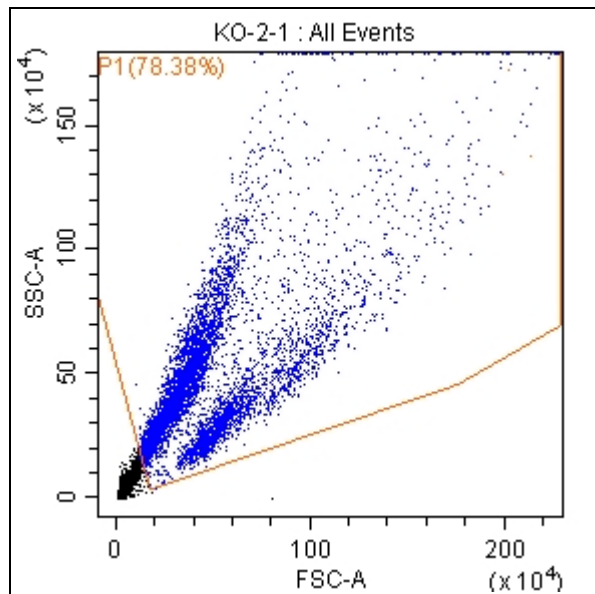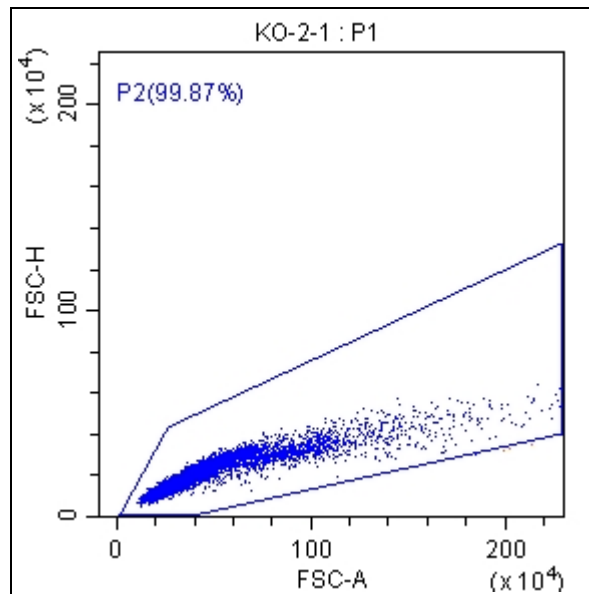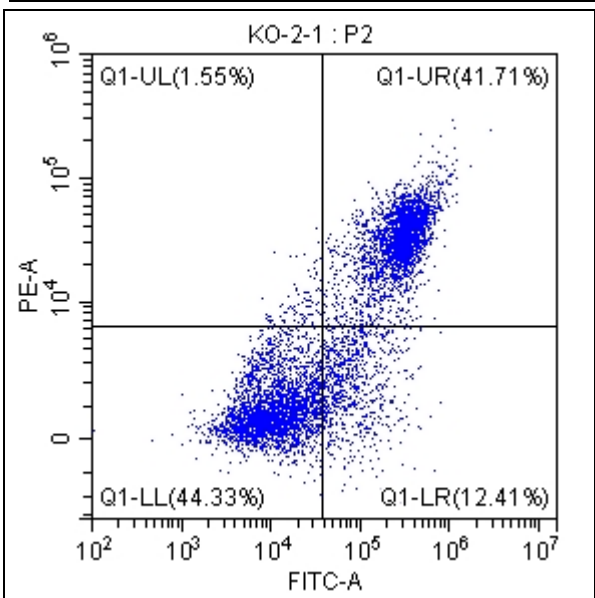

试管名称: KO-2-1

样本ID:

| 群体             | 颗粒数  | %总数     | %父群     |
|----------------|------|---------|---------|
| ▼ ● All Events | 7914 | 100.00% | 100.00% |
| ▼ ● P1         | 6203 | 78.38%  | 78.38%  |
| ▼ ● P2         | 6195 | 78.28%  | 99.87%  |
| ⊗ Q1-UR        | 2584 | 32.65%  | 41.71%  |
| ⊗ Q1-UL        | 96   | 1.21%   | 1.55%   |
| ⊗ Q1-LL        | 2746 | 34.70%  | 44.33%  |
| ⊗ Q1-LR        | 769  | 9.72%   | 12.41%  |

Supplement: Data_Sheet_1.zip [file Data_Sheet_1.zip]

# BD FACSDiva 8.0.2

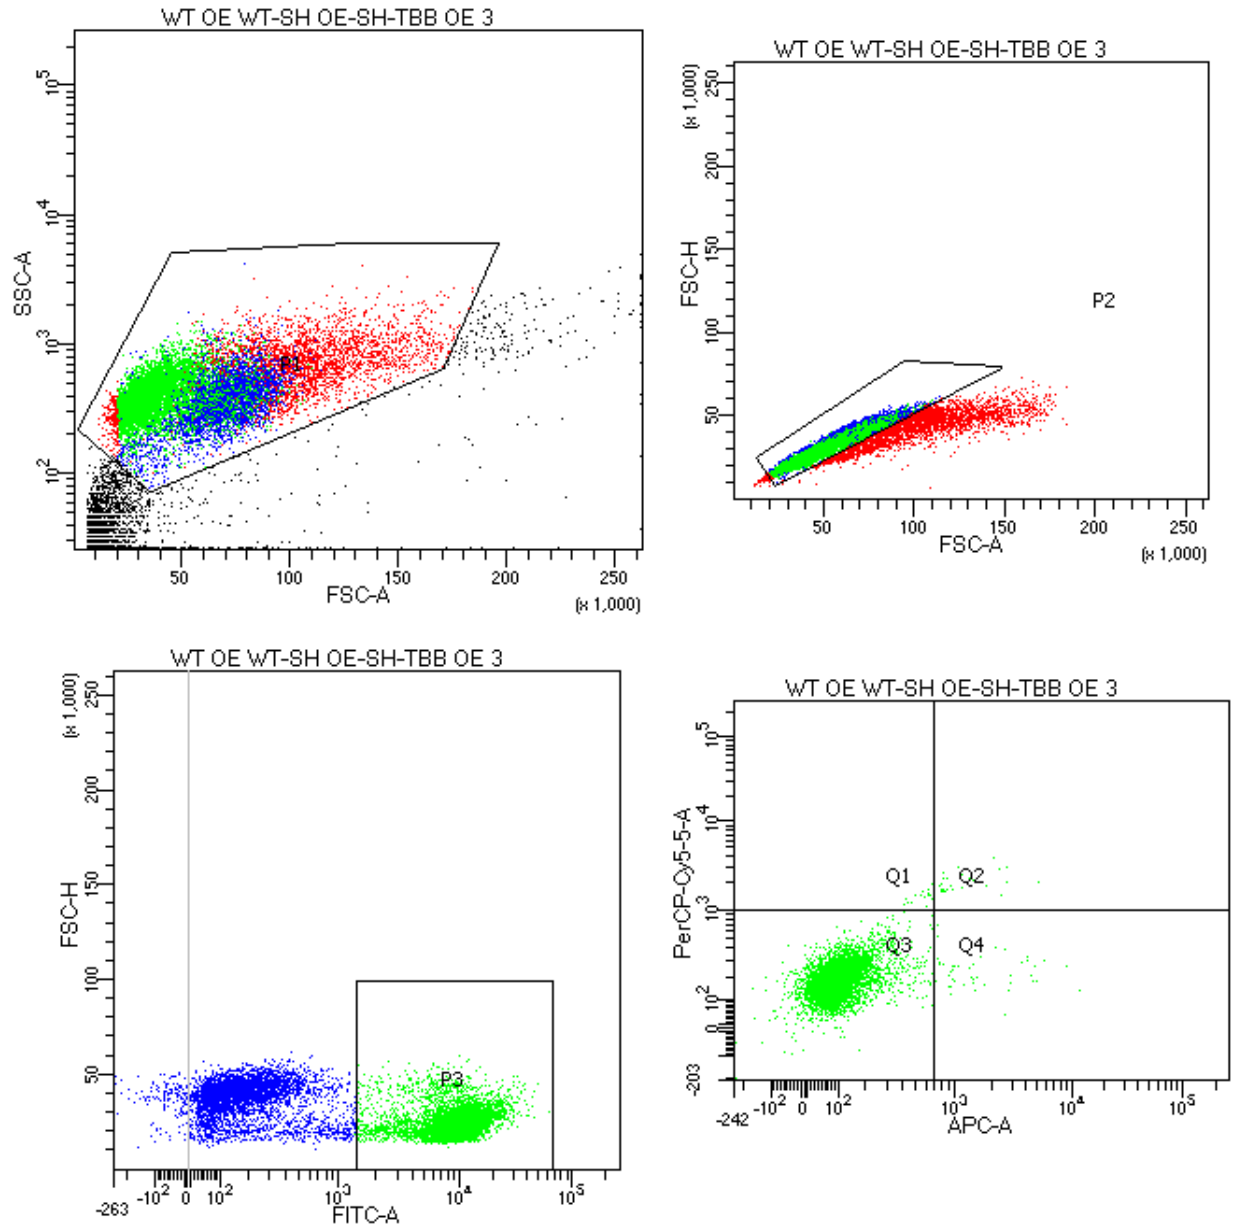

| Tube: TBB OE 3 |         |         |        |
|----------------|---------|---------|--------|
| Population     | #Events | %Parent | %Total |
| ■ All Events   | 17,189  | ####    | 100.0  |
| ■ P1           | 13,335  | 77.6    | 77.6   |
| ■ P2           | 10,000  | 75.0    | 58.2   |
| ■ P3           | 5,645   | 56.4    | 32.8   |
| ☒ Q1           | 17      | 0.3     | 0.1    |
| ☒ Q2           | 25      | 0.4     | 0.1    |
| ☒ Q3           | 5,556   | 98.4    | 32.3   |
| ☒ Q4           | 47      | 0.8     | 0.3    |

Supplement: Data_Sheet_1.zip [file Data_Sheet_1.zip]

# BD FACSDiva 8.0.2

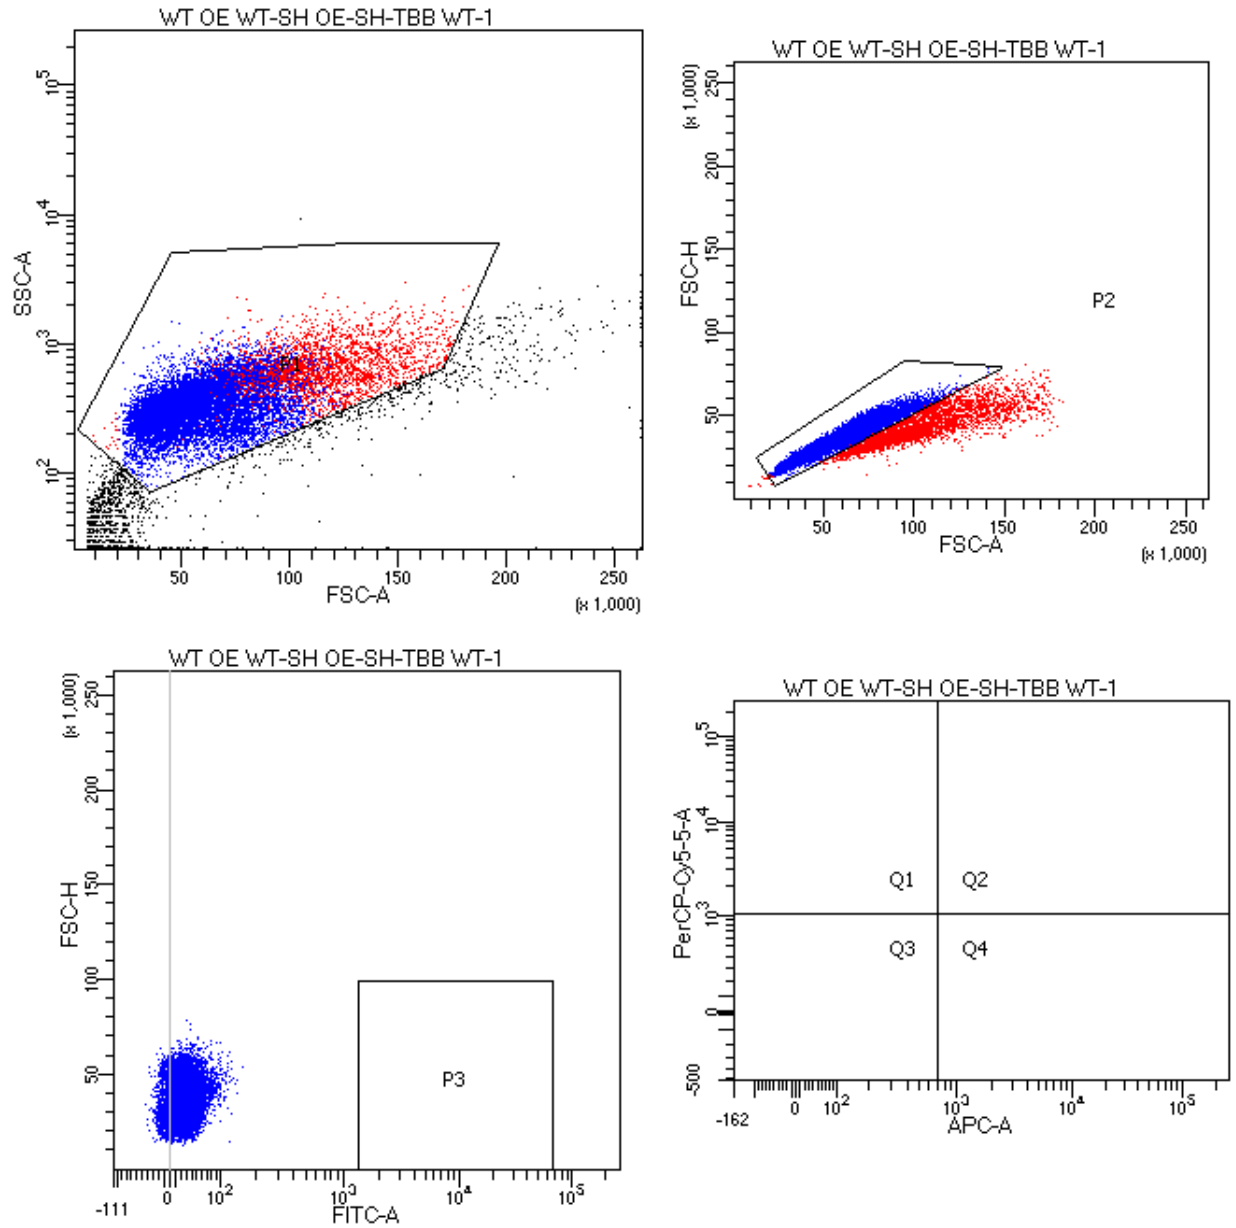

| Tube: TBB WT-1 |         |         |        |
|----------------|---------|---------|--------|
| Population     | #Events | %Parent | %Total |
| ■ All Events   | 15,504  | ####    | 100.0  |
| ■ P1           | 13,626  | 87.9    | 87.9   |
| ■ P2           | 10,000  | 73.4    | 64.5   |
| ■ P3           | 0       | 0.0     | 0.0    |
| □ Q1           | 0       | ####    | 0.0    |
| □ Q2           | 0       | ####    | 0.0    |
| □ Q3           | 0       | ####    | 0.0    |
| □ Q4           | 0       | ####    | 0.0    |

Supplement: Data_Sheet_1.zip [file Data_Sheet_1.zip]

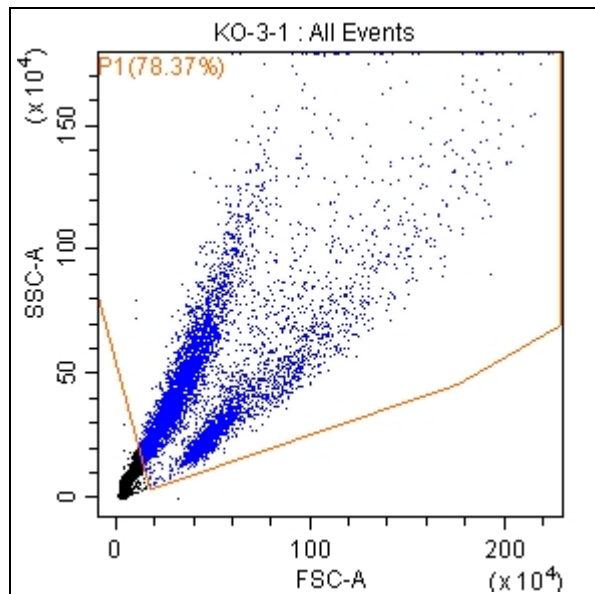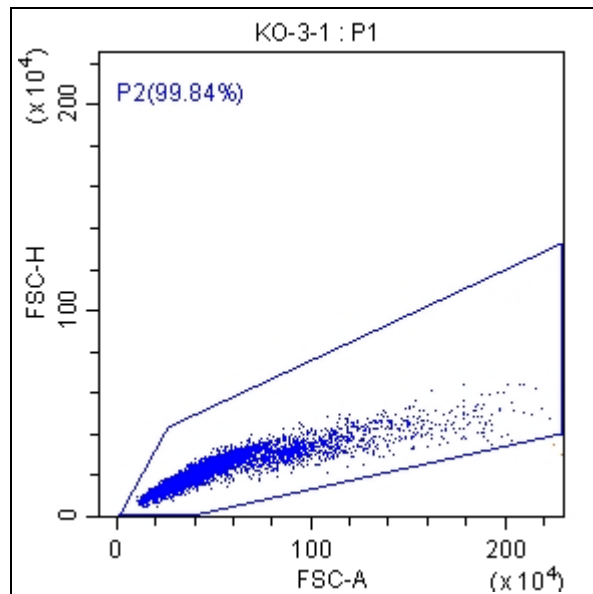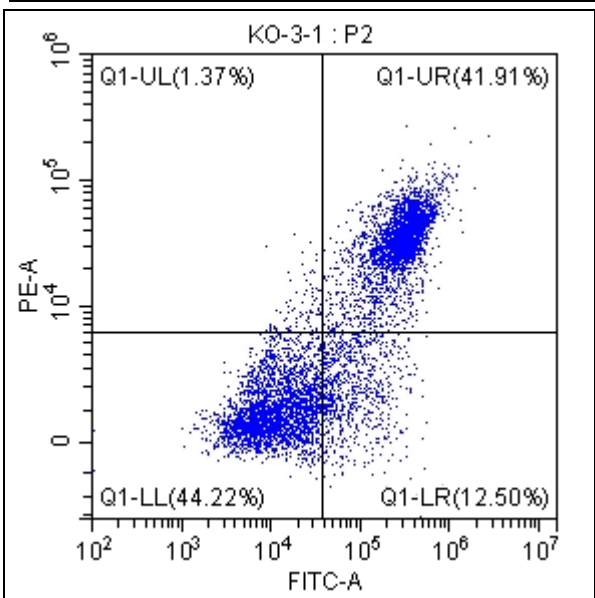

试管名称: KO-3-1

样本ID:

| 群体             | 颗粒数  | %总数     | %父群     |
|----------------|------|---------|---------|
| ▼ ● All Events | 7916 | 100.00% | 100.00% |
| ▼ ● P1         | 6204 | 78.37%  | 78.37%  |
| ▼ ● P2         | 6194 | 78.25%  | 99.84%  |
| ⊗ Q1-UR        | 2596 | 32.79%  | 41.91%  |
| ⊗ Q1-UL        | 85   | 1.07%   | 1.37%   |
| ⊗ Q1-LL        | 2739 | 34.60%  | 44.22%  |
| ⊗ Q1-LR        | 774  | 9.78%   | 12.50%  |

Supplement: Data_Sheet_1.zip [file Data_Sheet_1.zip]

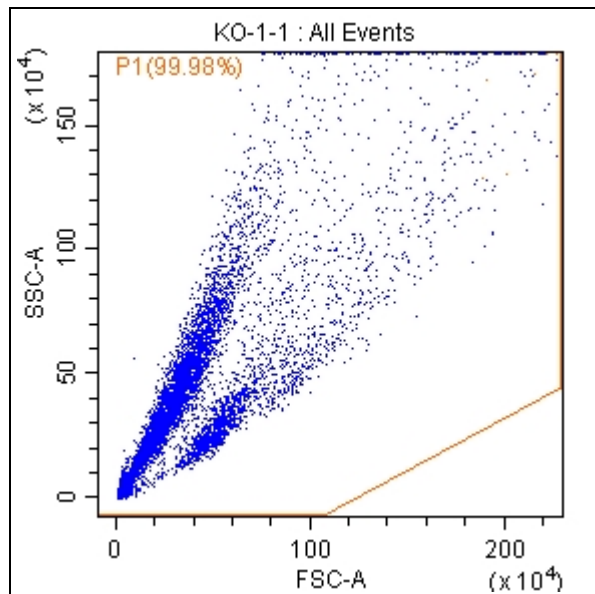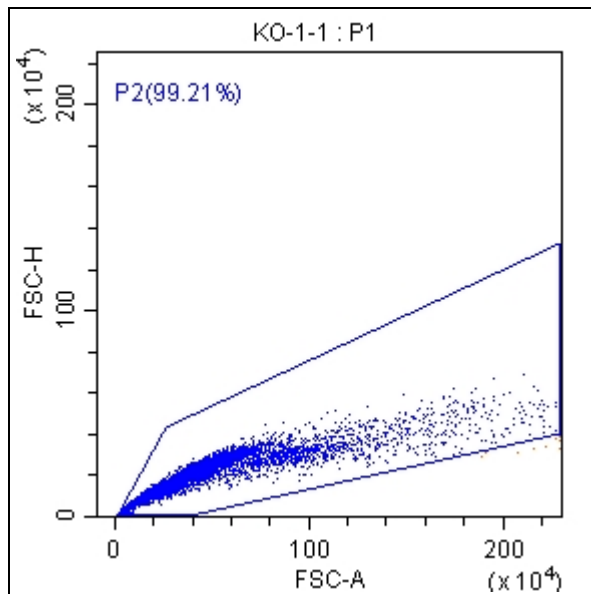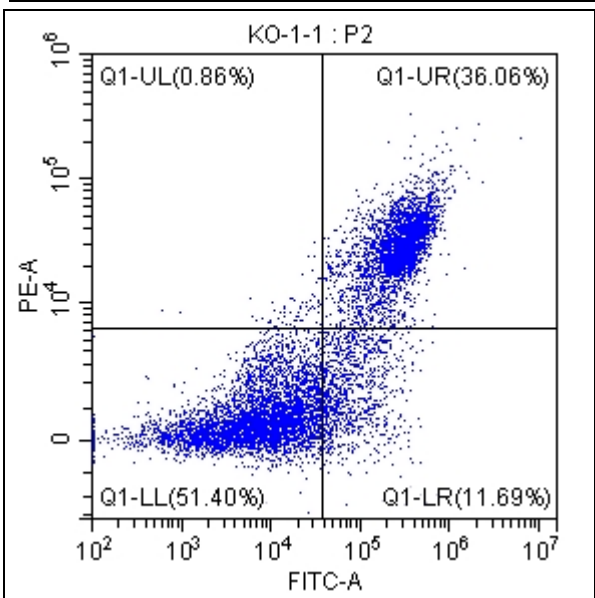

试管名称: KO-1-1

样本ID:

| 群体             | 颗粒数  | %总数     | %父群     |
|----------------|------|---------|---------|
| ▼ ● All Events | 8343 | 100.00% | 100.00% |
| ▼ ● P1         | 8341 | 99.98%  | 99.98%  |
| ▼ ● P2         | 8275 | 99.18%  | 99.21%  |
| ⊗ Q1-UR        | 2984 | 35.77%  | 36.06%  |
| ⊗ Q1-UL        | 71   | 0.85%   | 0.86%   |
| ⊗ Q1-LL        | 4253 | 50.98%  | 51.40%  |
| ⊗ Q1-LR        | 967  | 11.59%  | 11.69%  |

Supplement: Data_Sheet_1.zip [file Data_Sheet_1.zip]

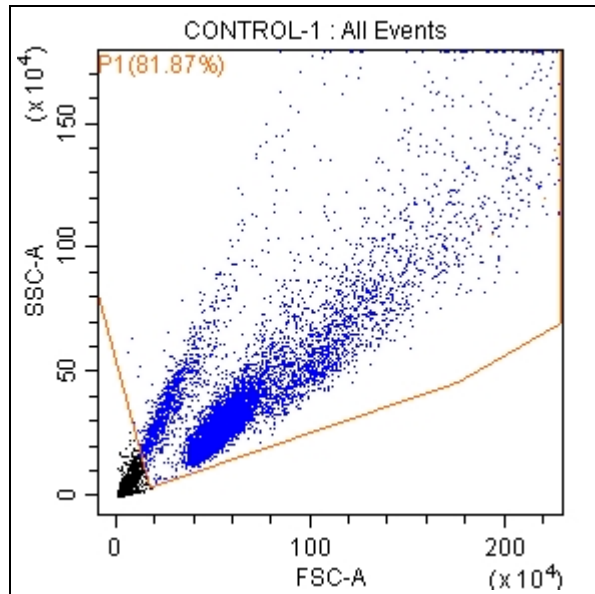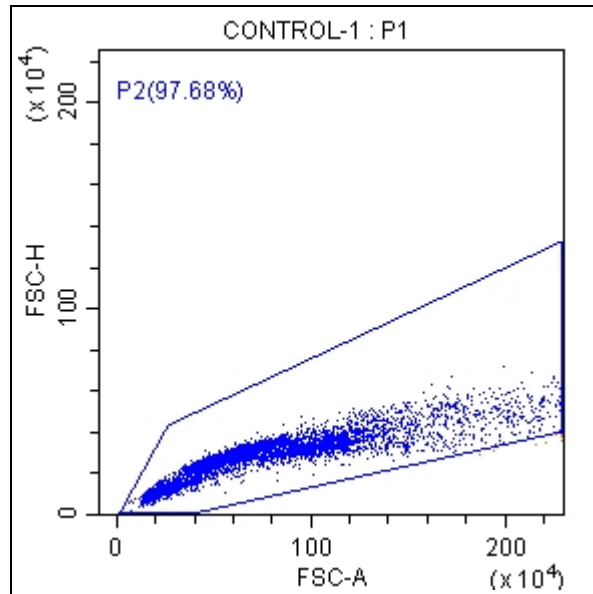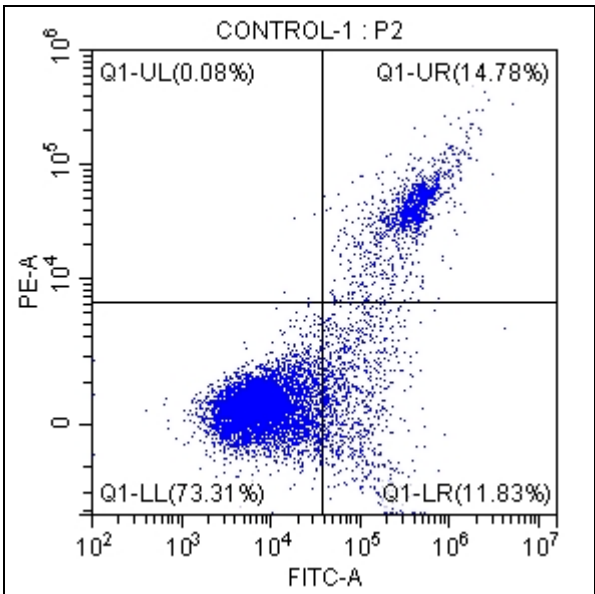

试管名称: CONTROL-1

样本ID:

| 群体             | 颗粒数  | %总数     | %父群     |
|----------------|------|---------|---------|
| ▼ ● All Events | 9250 | 100.00% | 100.00% |
| ▼ ● P1         | 7573 | 81.87%  | 81.87%  |
| ▼ ● P2         | 7397 | 79.97%  | 97.68%  |
| ⊗ Q1-UR        | 1093 | 11.82%  | 14.78%  |
| ⊗ Q1-UL        | 6    | 0.06%   | 0.08%   |
| ⊗ Q1-LL        | 5423 | 58.63%  | 73.31%  |
| ⊗ Q1-LR        | 875  | 9.46%   | 11.83%  |

Supplement: Data_Sheet_1.zip [file Data_Sheet_1.zip]

# BD FACSDiva 8.0.2

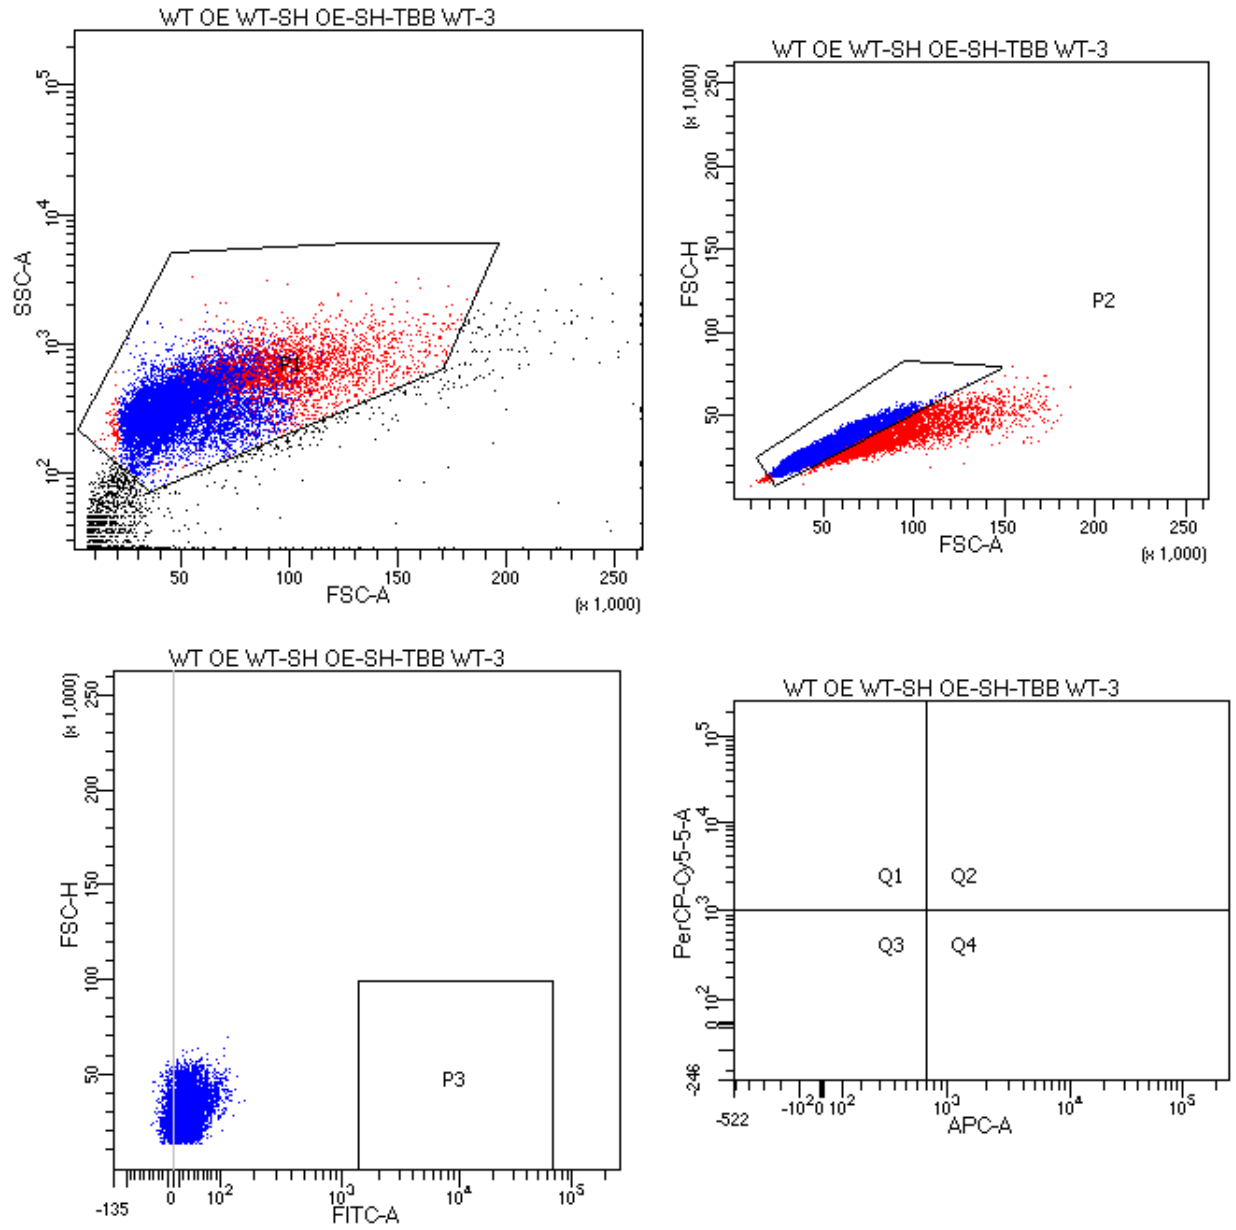

Tube: TBB WT-3

| Population   | #Events | %Parent | %Total |
|--------------|---------|---------|--------|
| ■ All Events | 15,564  | ####    | 100.0  |
| ■ P1         | 13,756  | 88.4    | 88.4   |
| ■ P2         | 10,000  | 72.7    | 64.3   |
| ■ P3         | 0       | 0.0     | 0.0    |
| □ Q1         | 0       | ####    | 0.0    |
| □ Q2         | 0       | ####    | 0.0    |
| □ Q3         | 0       | ####    | 0.0    |
| □ Q4         | 0       | ####    | 0.0    |

Supplement: Data_Sheet_1.zip [file Data_Sheet_1.zip]

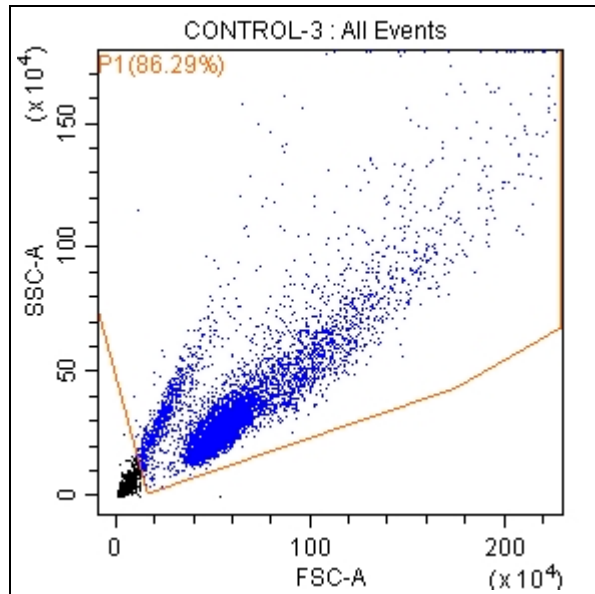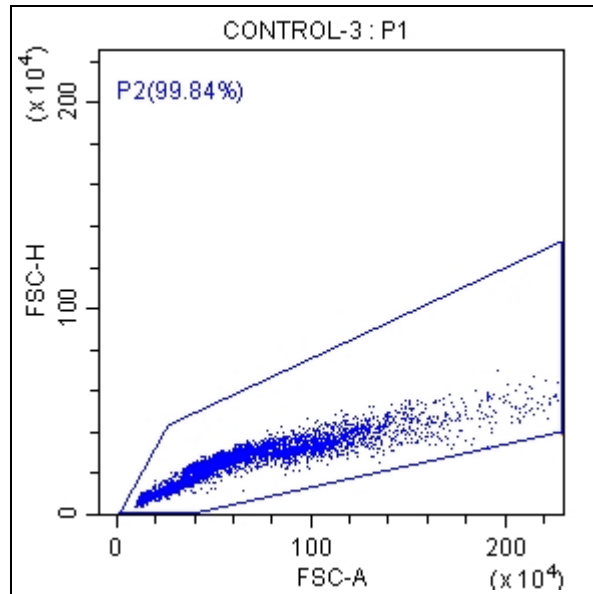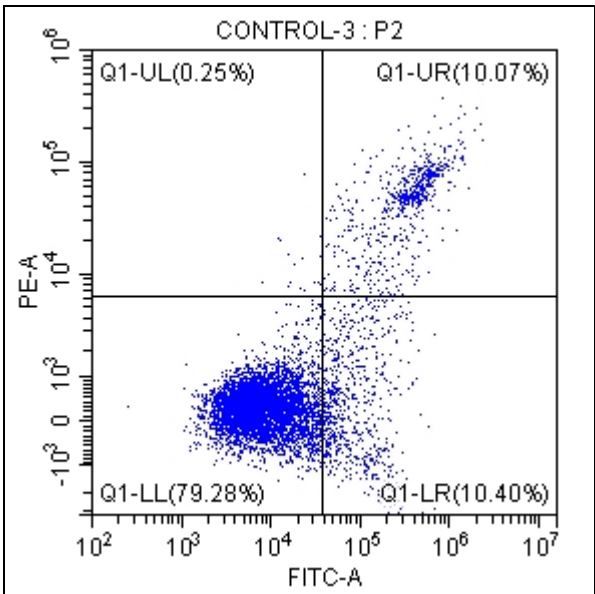

试管名称: CONTROL-3

样本ID:

| 群体             | 颗粒数  | %总数     | %父群     |
|----------------|------|---------|---------|
| ▼ ● All Events | 7424 | 100.00% | 100.00% |
| ▼ ● P1         | 6406 | 86.29%  | 86.29%  |
| ▼ ● P2         | 6396 | 86.15%  | 99.84%  |
| ⊗ Q1-UR        | 644  | 8.67%   | 10.07%  |
| ⊗ Q1-UL        | 16   | 0.22%   | 0.25%   |
| ⊗ Q1-LL        | 5071 | 68.31%  | 79.28%  |
| ⊗ Q1-LR        | 665  | 8.96%   | 10.40%  |

Supplement: Data_Sheet_1.zip [file Data_Sheet_1.zip]

# BD FACSDiva 8.0.2

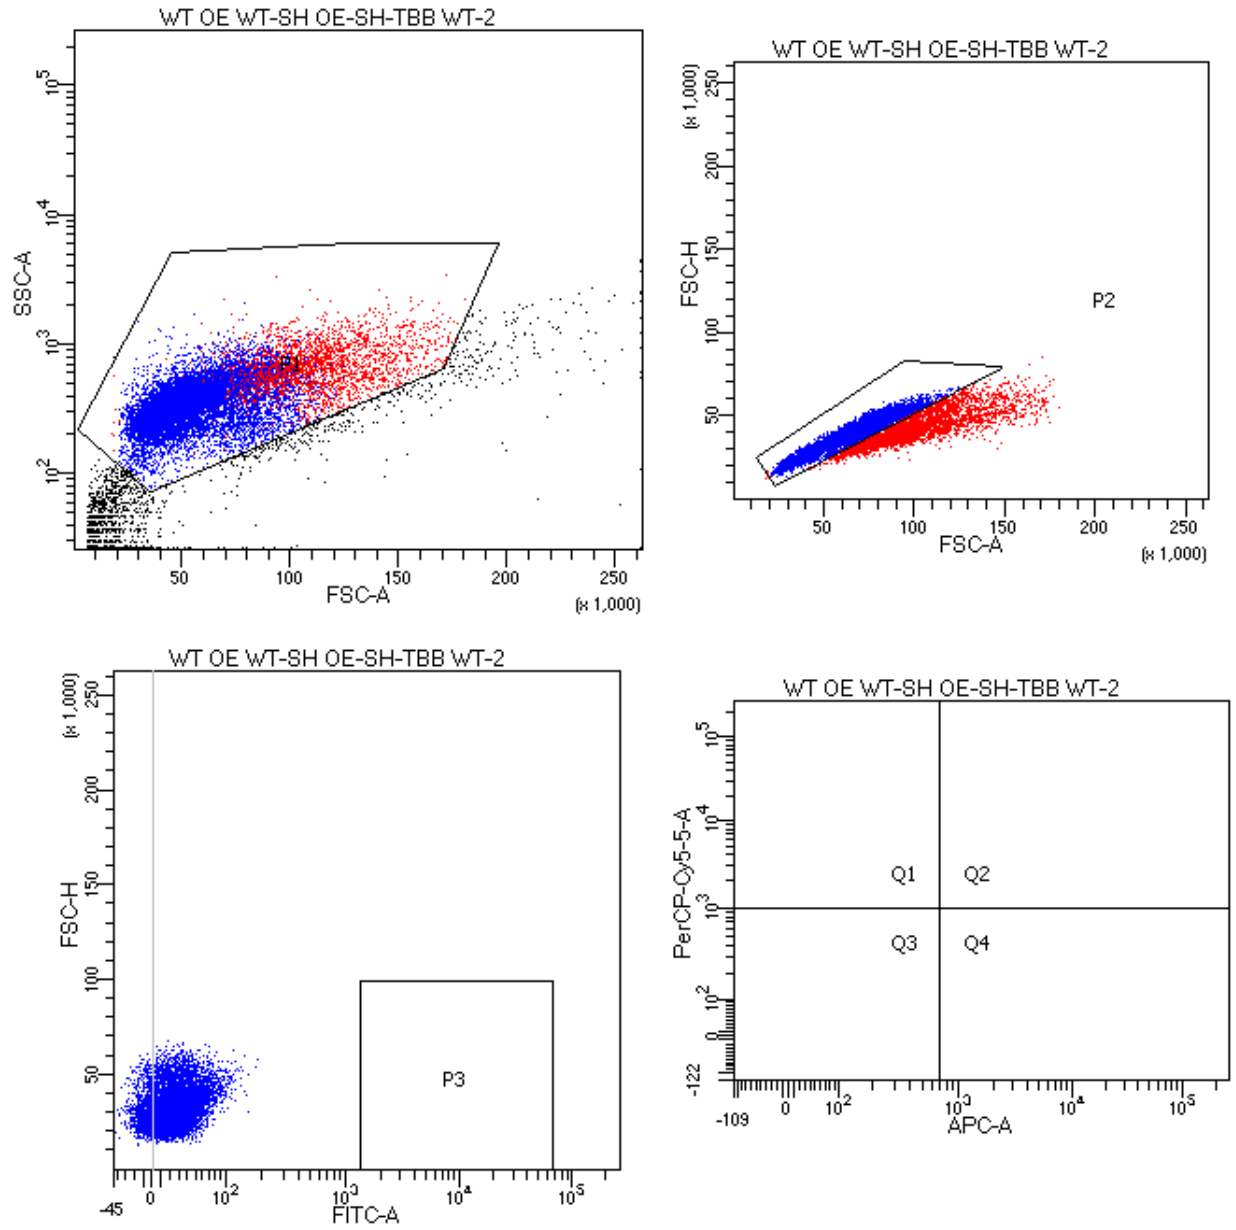

| Tube: TBB WT-2 |         |         |        |
|----------------|---------|---------|--------|
| Population     | #Events | %Parent | %Total |
| ■ All Events   | 15,508  | ####    | 100.0  |
| ■ P1           | 13,605  | 87.7    | 87.7   |
| ■ P2           | 10,000  | 73.5    | 64.5   |
| ■ P3           | 0       | 0.0     | 0.0    |
| ☒ Q1           | 0       | ####    | 0.0    |
| ☒ Q2           | 0       | ####    | 0.0    |
| ☒ Q3           | 0       | ####    | 0.0    |
| ☒ Q4           | 0       | ####    | 0.0    |

Supplement: Data_Sheet_1.zip [file Data_Sheet_1.zip]

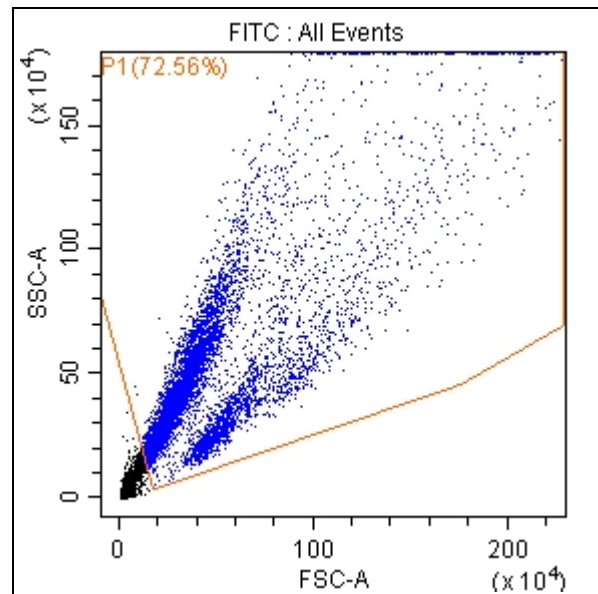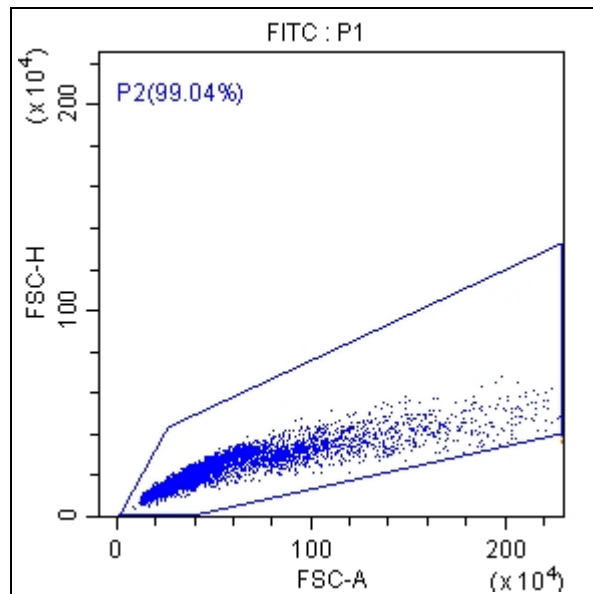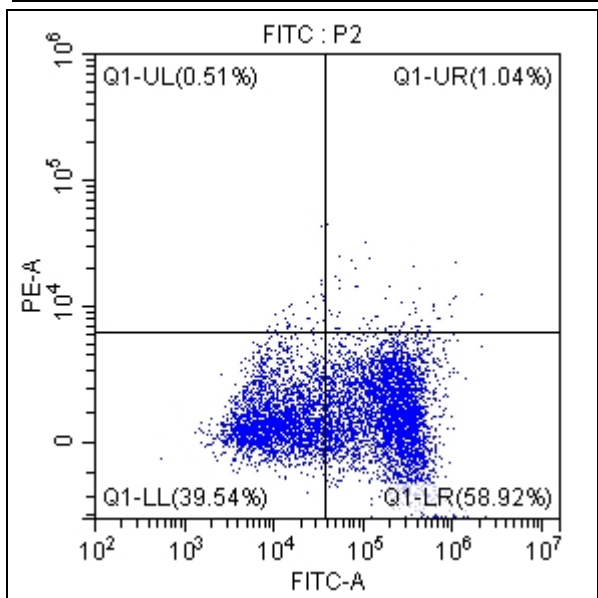

试管名称: FITC

样本ID:

| 群体             | 颗粒数  | %总数     | %父群     |
|----------------|------|---------|---------|
| ▼ ● All Events | 9355 | 100.00% | 100.00% |
| ▼ ● P1         | 6788 | 72.56%  | 72.56%  |
| ▼ ● P2         | 6723 | 71.87%  | 99.04%  |
| ⊗ Q1-UR        | 70   | 0.75%   | 1.04%   |
| ⊗ Q1-UL        | 34   | 0.36%   | 0.51%   |
| ⊗ Q1-LL        | 2658 | 28.41%  | 39.54%  |
| ⊗ Q1-LR        | 3961 | 42.34%  | 58.92%  |

Supplement: Data_Sheet_1.zip [file Data_Sheet_1.zip]

# BD FACSDiva 8.0.2

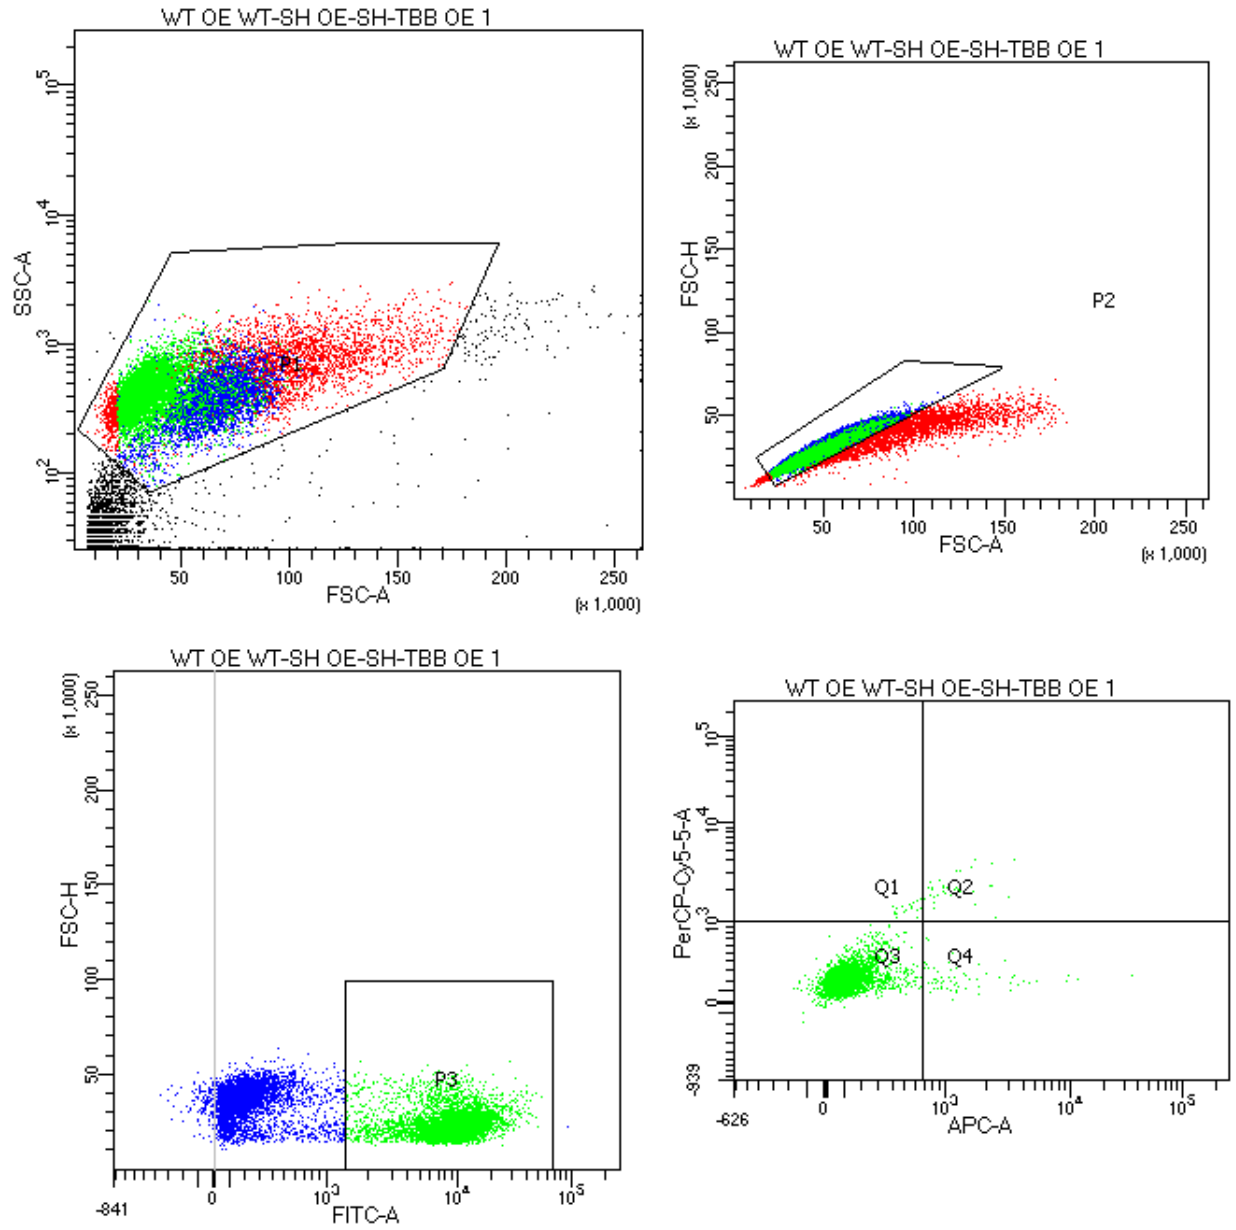

| Tube: TBB OE 1 |         |         |        |
|----------------|---------|---------|--------|
| Population     | #Events | %Parent | %Total |
| ■ All Events   | 17,212  | ####    | 100.0  |
| ■ P1           | 13,427  | 78.0    | 78.0   |
| ■ P2           | 10,000  | 74.5    | 58.1   |
| ■ P3           | 5,657   | 56.6    | 32.9   |
| ☒ Q1           | 22      | 0.4     | 0.1    |
| ☒ Q2           | 37      | 0.7     | 0.2    |
| ☒ Q3           | 5,538   | 97.9    | 32.2   |
| ☒ Q4           | 60      | 1.1     | 0.3    |

Supplement: Data_Sheet_1.zip [file Data_Sheet_1.zip]

# BD FACSDiva 8.0.2

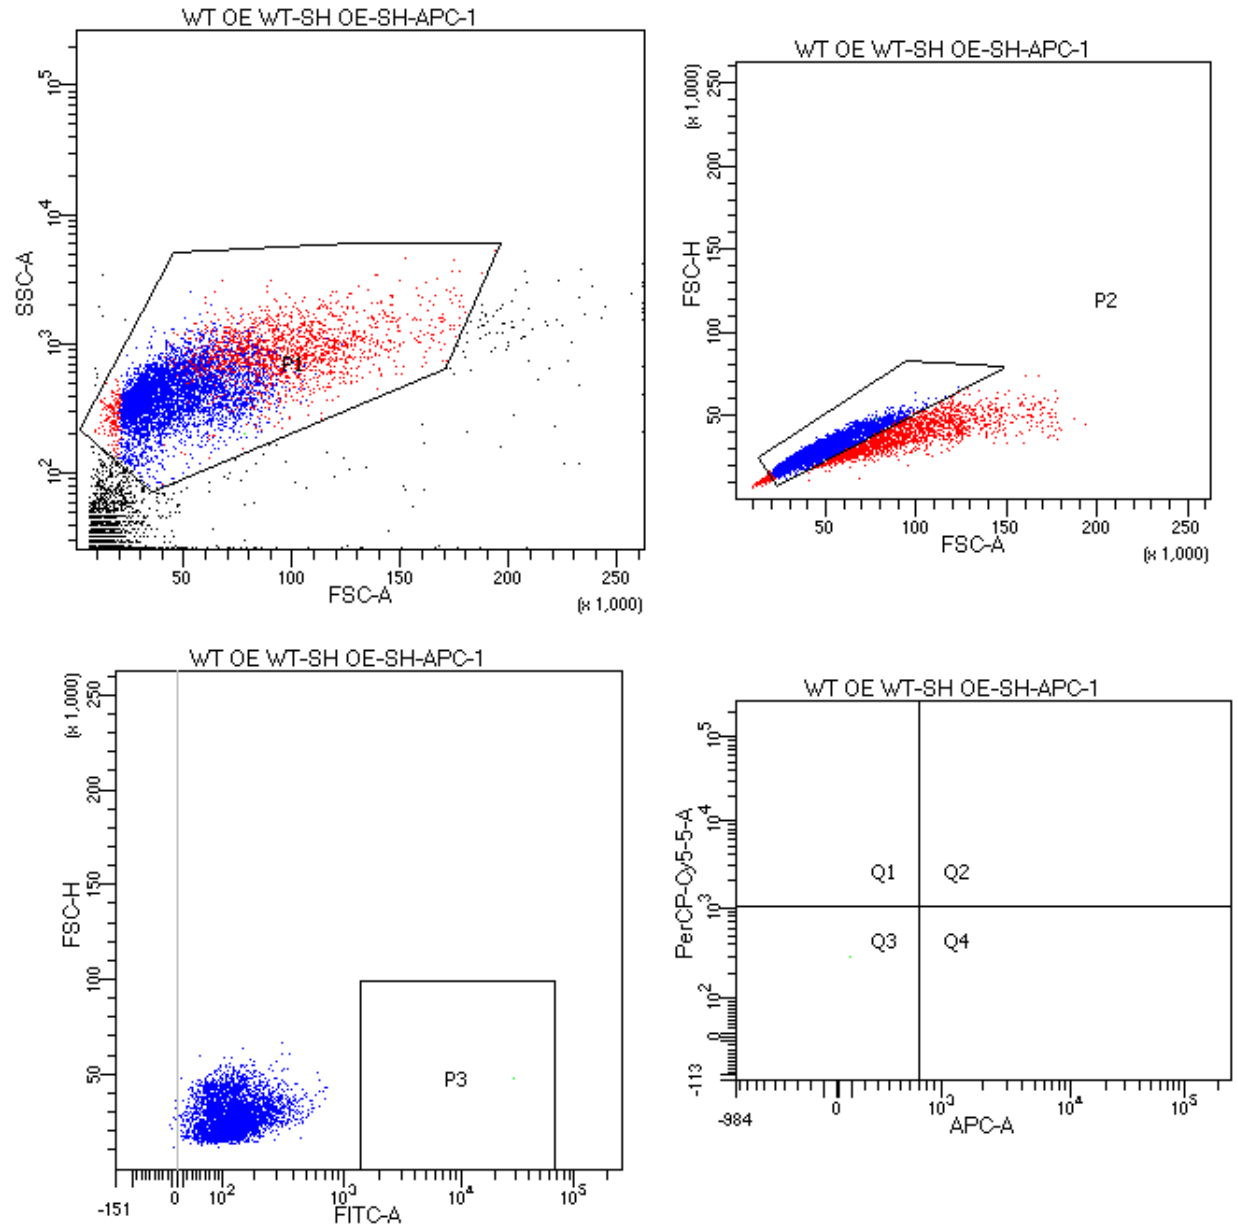

| Tube: APC-1  |         |         |        |
|--------------|---------|---------|--------|
| Population   | #Events | %Parent | %Total |
| ■ All Events | 9,350   | ####    | 100.0  |
| ■ P1         | 6,868   | 73.5    | 73.5   |
| ■ P2         | 4,805   | 70.0    | 51.4   |
| ■ P3         | 1       | 0.0     | 0.0    |
| ☒ Q1         | 0       | 0.0     | 0.0    |
| ☒ Q2         | 0       | 0.0     | 0.0    |
| ☒ Q3         | 1       | 100.0   | 0.0    |
| ☒ Q4         | 0       | 0.0     | 0.0    |

Supplement: Data_Sheet_6.zip [file Data_Sheet_6.zip]

# BD FACSDiva 8.0.2

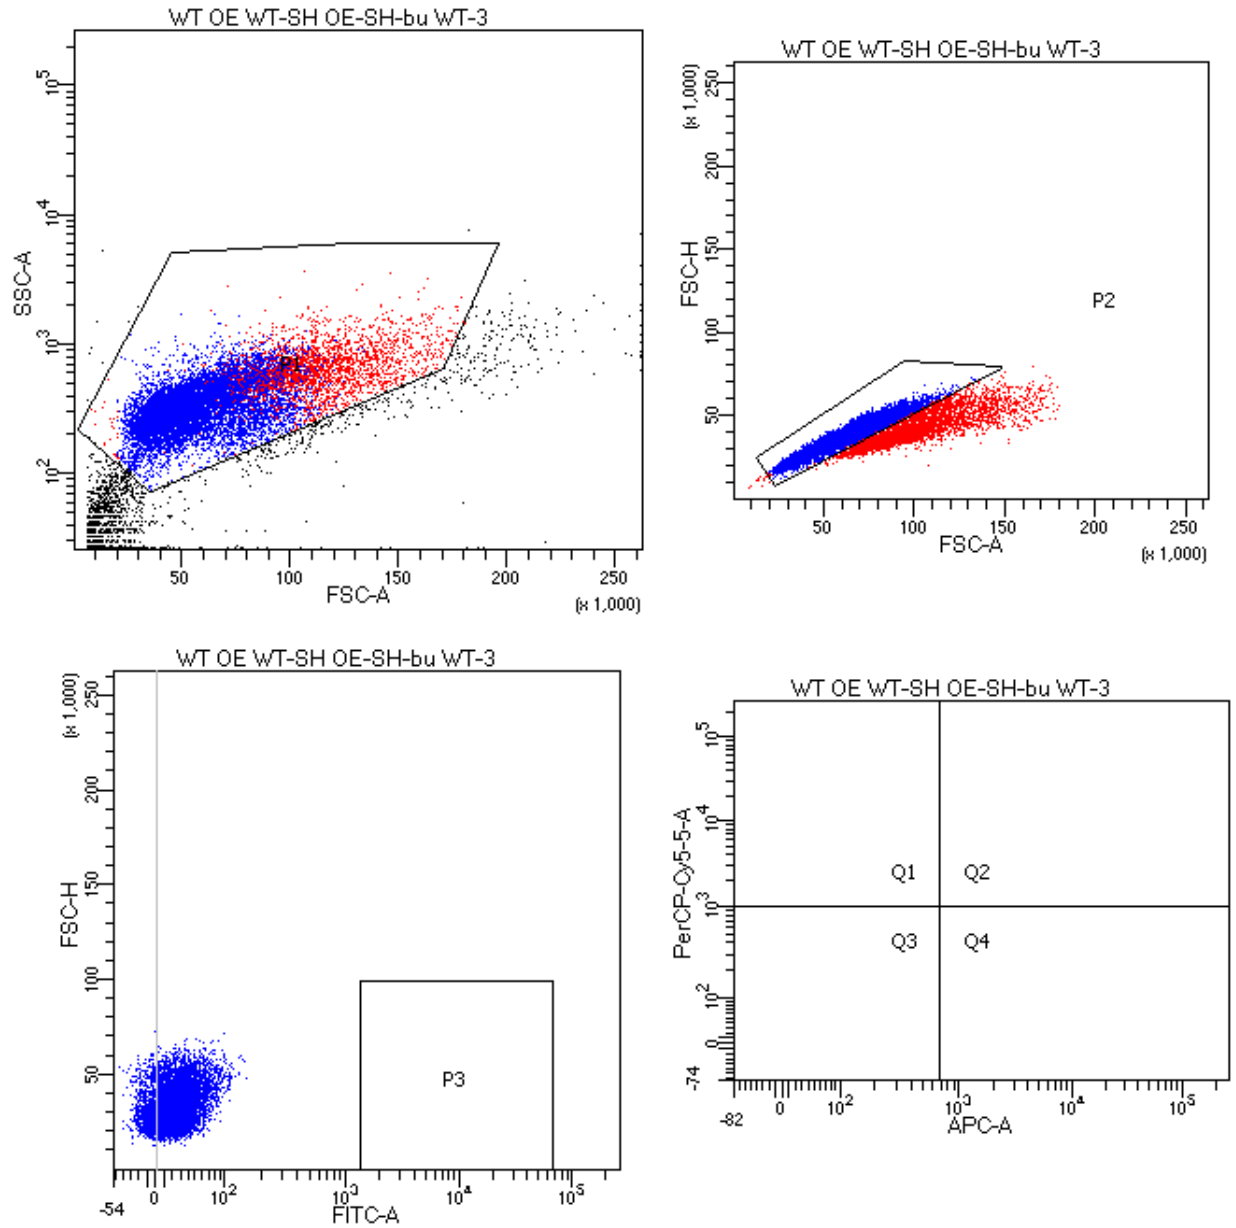

| Tube: bu WT-3 |         |         |        |
|---------------|---------|---------|--------|
| Population    | #Events | %Parent | %Total |
| ■ All Events  | 15,578  | ####    | 100.0  |
| ■ P1          | 13,520  | 86.8    | 86.8   |
| ■ P2          | 10,000  | 74.0    | 64.2   |
| ■ P3          | 0       | 0.0     | 0.0    |
| □ Q1          | 0       | ####    | 0.0    |
| □ Q2          | 0       | ####    | 0.0    |
| □ Q3          | 0       | ####    | 0.0    |
| □ Q4          | 0       | ####    | 0.0    |

Supplement: Data_Sheet_6.zip [file Data_Sheet_6.zip]

# BD FACSDiva 8.0.2

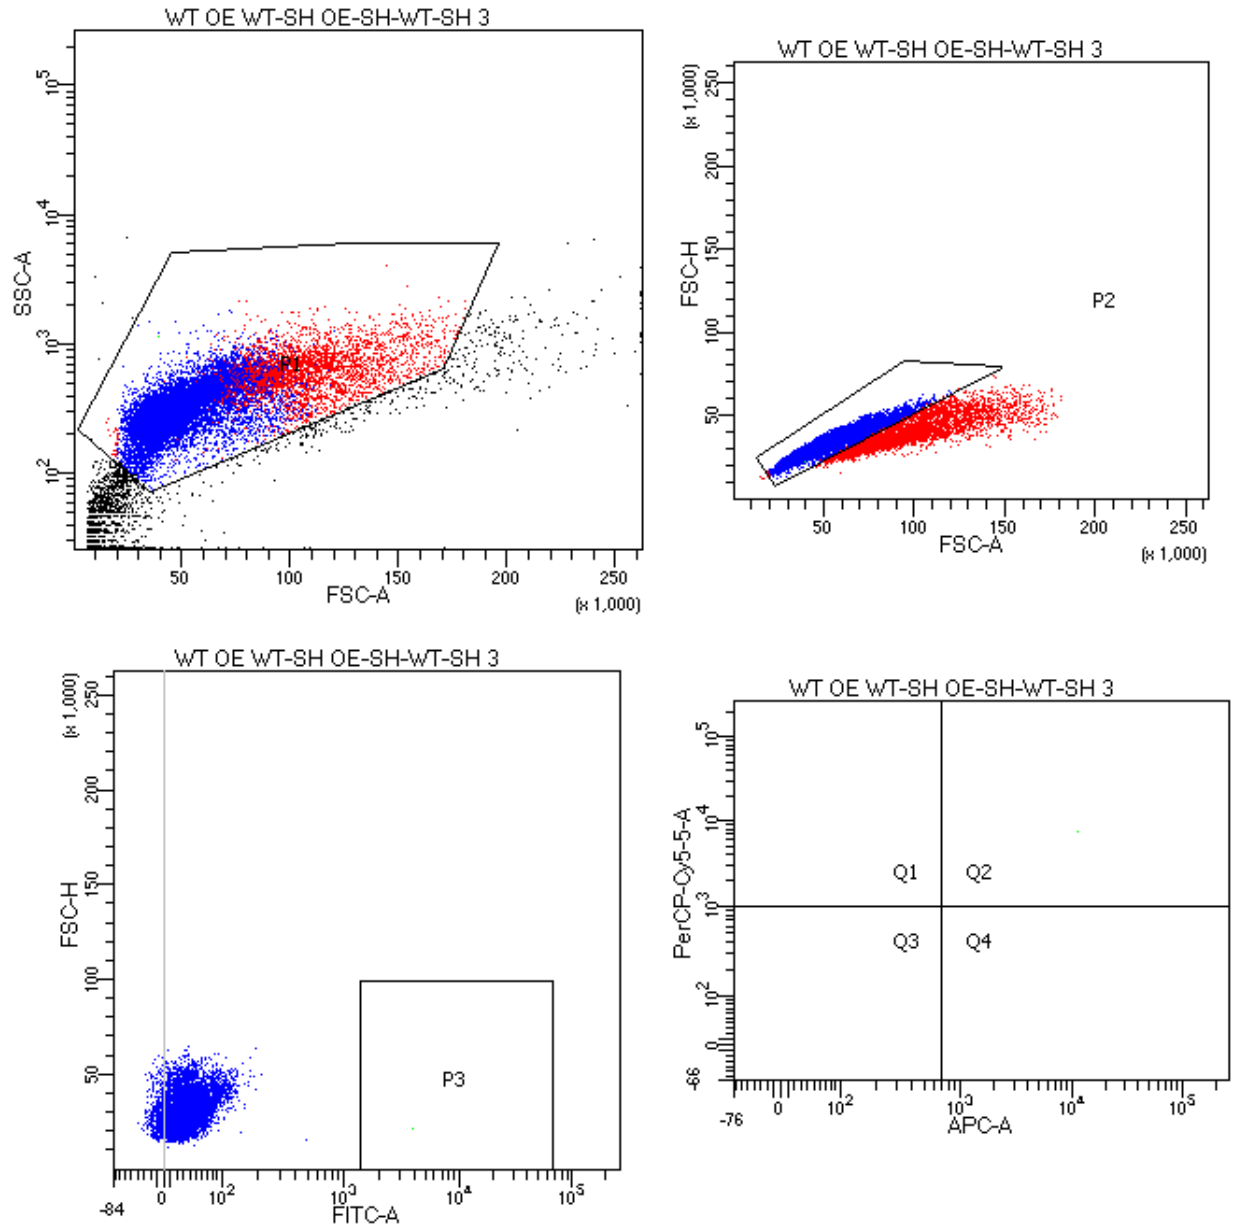

| Tube: WT-SH 3 |         |         |        |
|---------------|---------|---------|--------|
| Population    | #Events | %Parent | %Total |
| ■ All Events  | 16,786  | ####    | 100.0  |
| ■ P1          | 14,539  | 86.6    | 86.6   |
| ■ P2          | 10,000  | 68.8    | 59.6   |
| ■ P3          | 1       | 0.0     | 0.0    |
| □ Q1          | 0       | 0.0     | 0.0    |
| □ Q2          | 1       | 100.0   | 0.0    |
| □ Q3          | 0       | 0.0     | 0.0    |
| □ Q4          | 0       | 0.0     | 0.0    |

Supplement: Data_Sheet_6.zip [file Data_Sheet_6.zip]

# BD FACSDiva 8.0.2

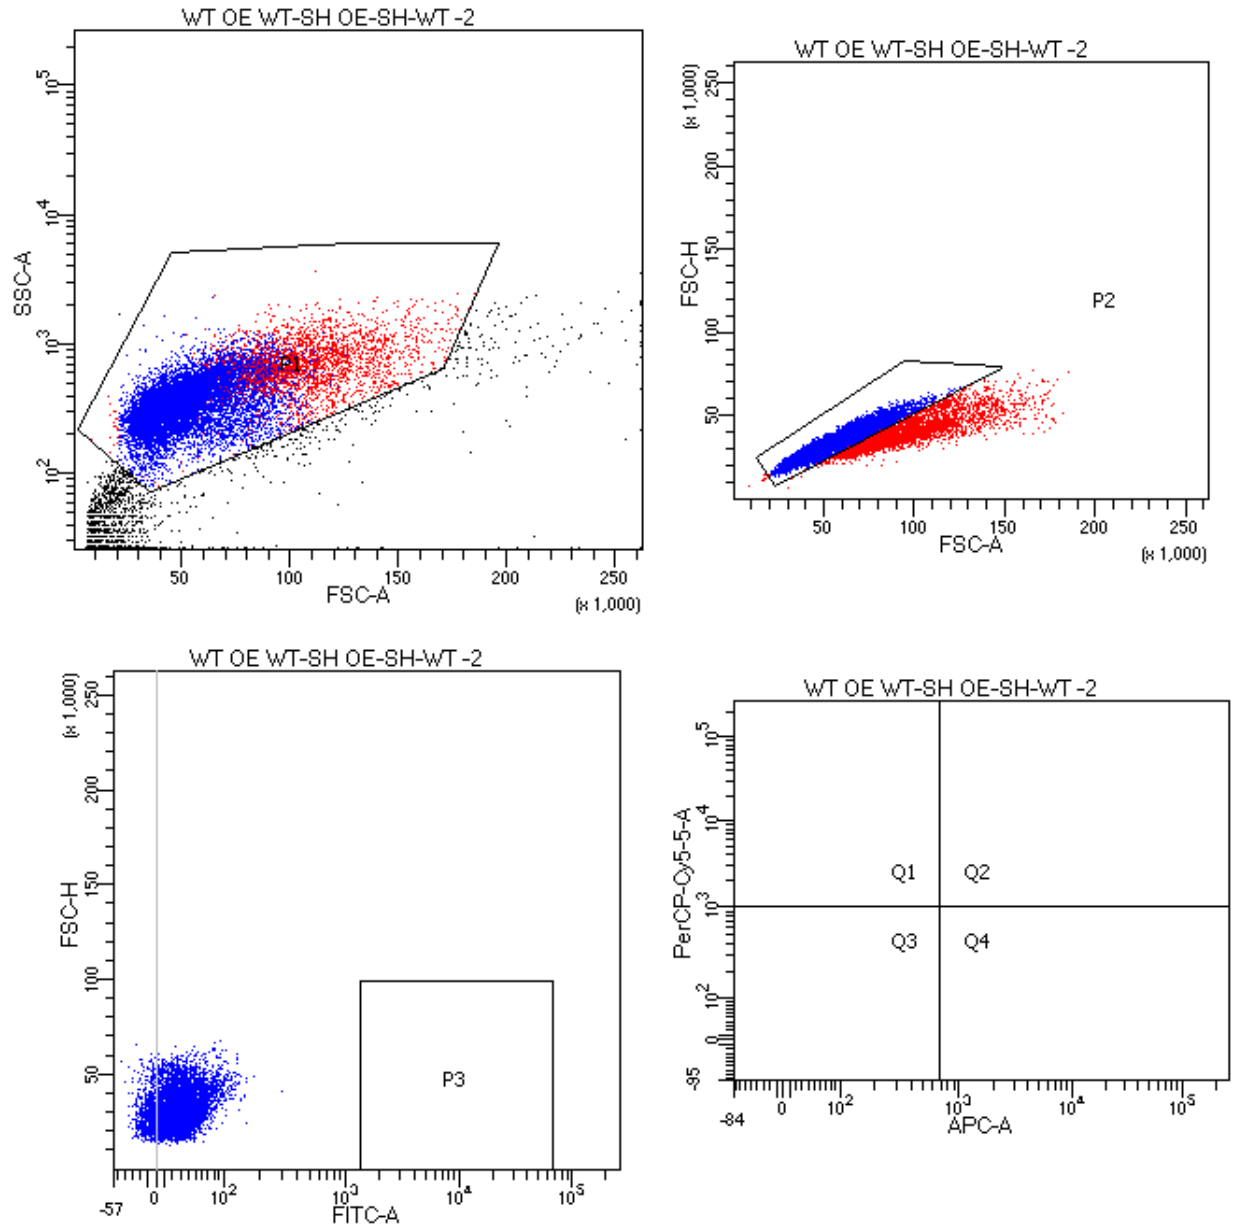

| Tube: WT -2  |         |         |        |
|--------------|---------|---------|--------|
| Population   | #Events | %Parent | %Total |
| ■ All Events | 15,623  | ####    | 100.0  |
| ■ P1         | 13,687  | 87.6    | 87.6   |
| ■ P2         | 10,000  | 73.1    | 64.0   |
| ■ P3         | 0       | 0.0     | 0.0    |
| □ Q1         | 0       | ####    | 0.0    |
| □ Q2         | 0       | ####    | 0.0    |
| □ Q3         | 0       | ####    | 0.0    |
| □ Q4         | 0       | ####    | 0.0    |

Supplement: Data_Sheet_6.zip [file Data_Sheet_6.zip]

# BD FACSDiva 8.0.2

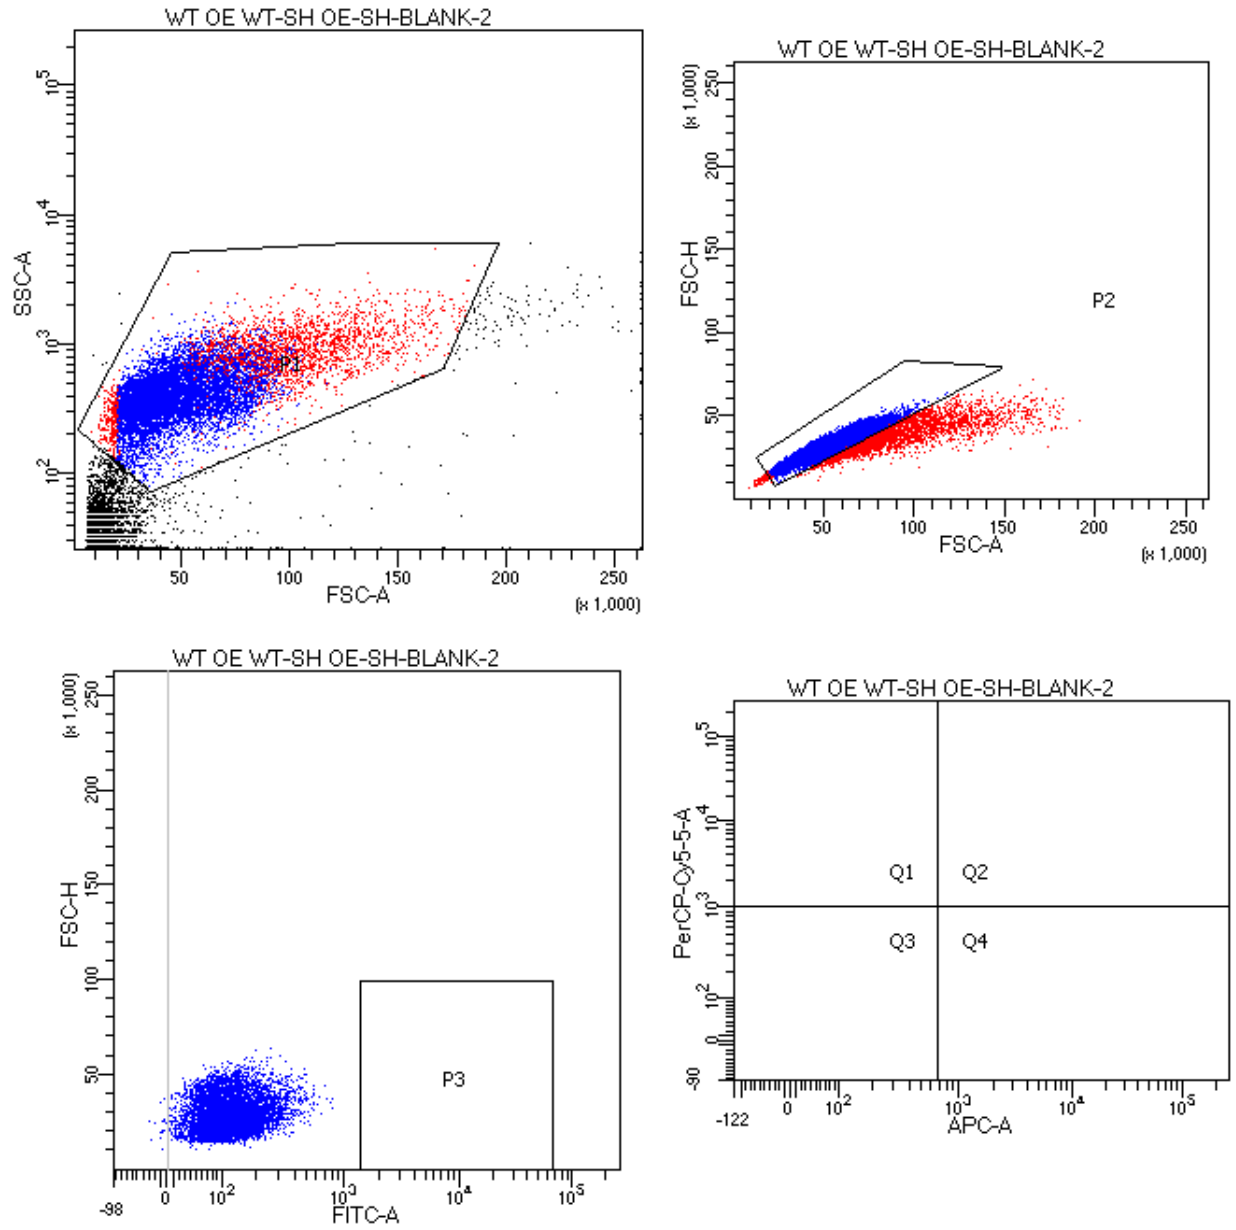

| Tube: BLANK-2 |         |         |        |
|---------------|---------|---------|--------|
| Population    | #Events | %Parent | %Total |
| ■ All Events  | 15,600  | ####    | 100.0  |
| ■ P1          | 11,130  | 71.3    | 71.3   |
| ■ P2          | 8,153   | 73.3    | 52.3   |
| ■ P3          | 0       | 0.0     | 0.0    |
| □ Q1          | 0       | ####    | 0.0    |
| □ Q2          | 0       | ####    | 0.0    |
| □ Q3          | 0       | ####    | 0.0    |
| □ Q4          | 0       | ####    | 0.0    |

Supplement: Data_Sheet_6.zip [file Data_Sheet_6.zip]

# BD FACSDiva 8.0.2

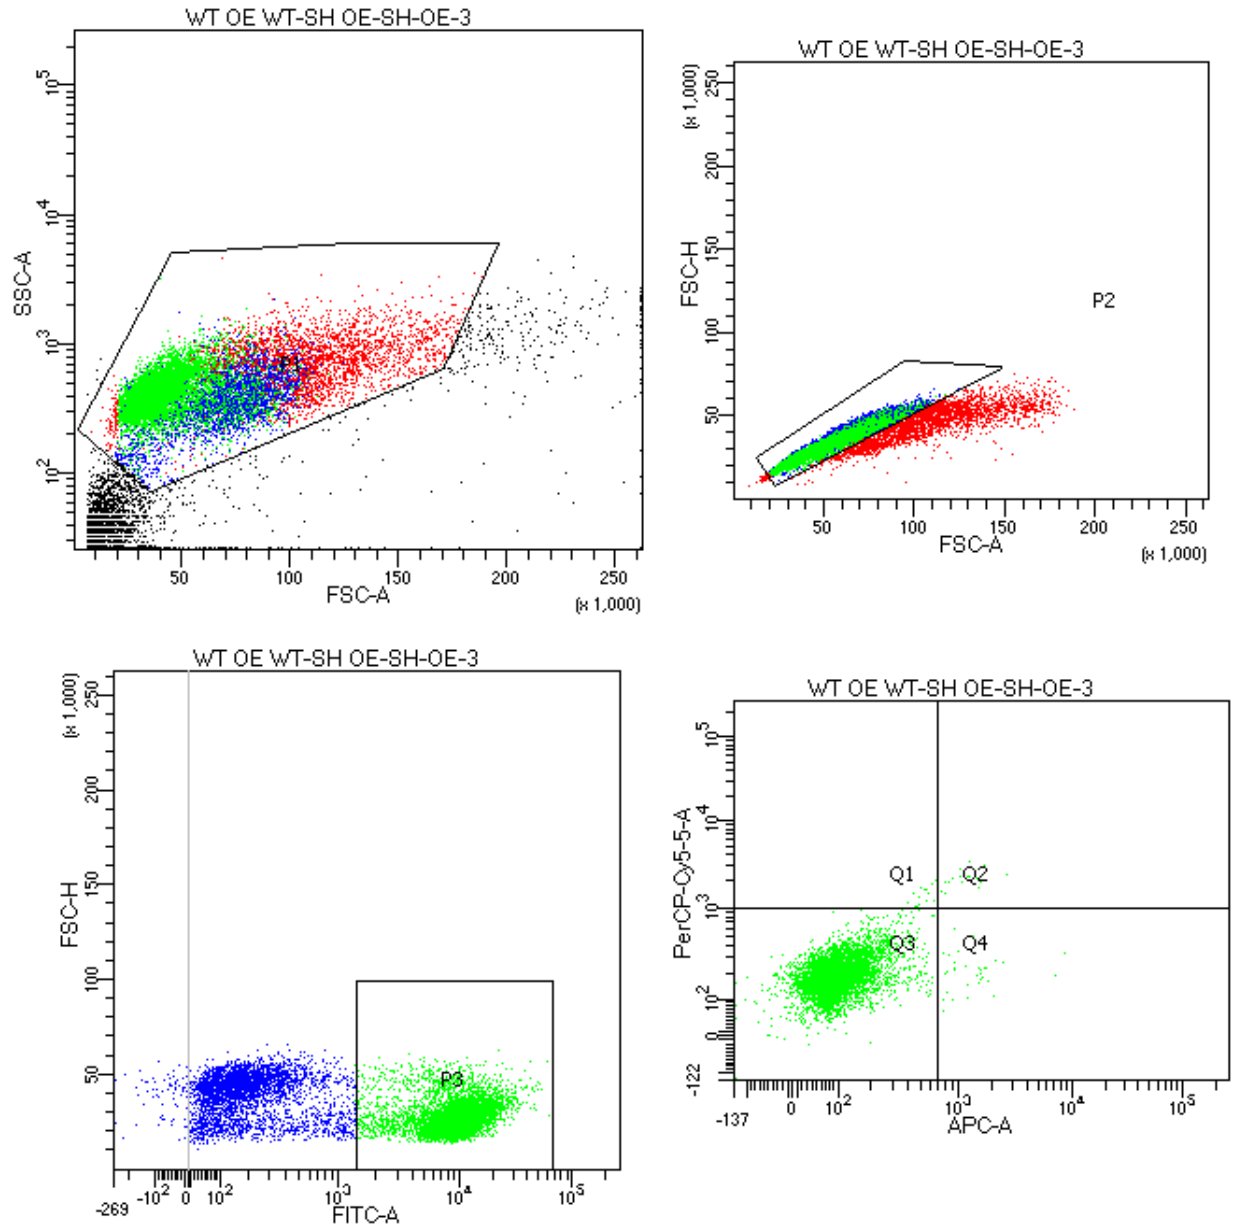

| Tube: OE-3   |         |         |        |
|--------------|---------|---------|--------|
| Population   | #Events | %Parent | %Total |
| ■ All Events | 17,769  | ####    | 100.0  |
| ■ P1         | 13,089  | 73.7    | 73.7   |
| ■ P2         | 10,000  | 76.4    | 56.3   |
| ■ P3         | 6,388   | 63.9    | 36.0   |
| ☒ Q1         | 16      | 0.3     | 0.1    |
| ☒ Q2         | 16      | 0.3     | 0.1    |
| ☒ Q3         | 6,323   | 99.0    | 35.6   |
| ☒ Q4         | 33      | 0.5     | 0.2    |

Supplement: Data_Sheet_6.zip [file Data_Sheet_6.zip]

# BD FACSDiva 8.0.2

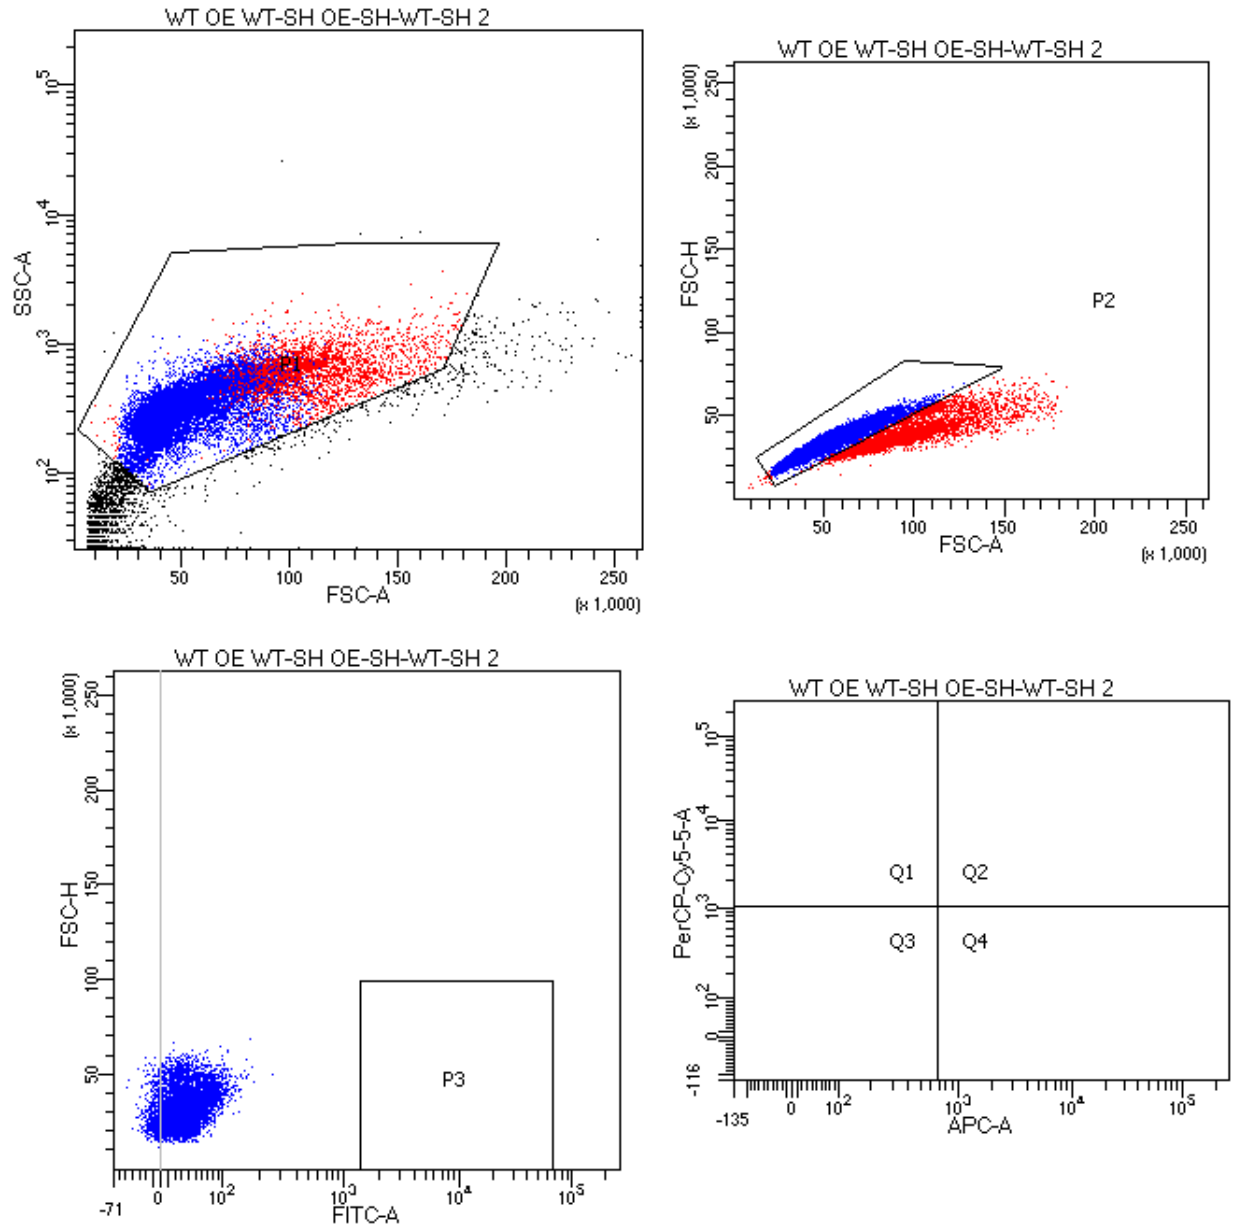

Tube: WT-SH 2

| Population | #Events | %Parent | %Total |
|------------|---------|---------|--------|
| All Events | 16,777  | ####    | 100.0  |
| P1         | 14,303  | 85.3    | 85.3   |
| P2         | 10,000  | 69.9    | 59.6   |
| P3         | 0       | 0.0     | 0.0    |
| Q1         | 0       | ####    | 0.0    |
| Q2         | 0       | ####    | 0.0    |
| Q3         | 0       | ####    | 0.0    |
| Q4         | 0       | ####    | 0.0    |

Supplement: Data_Sheet_6.zip [file Data_Sheet_6.zip]

# BD FACSDiva 8.0.2

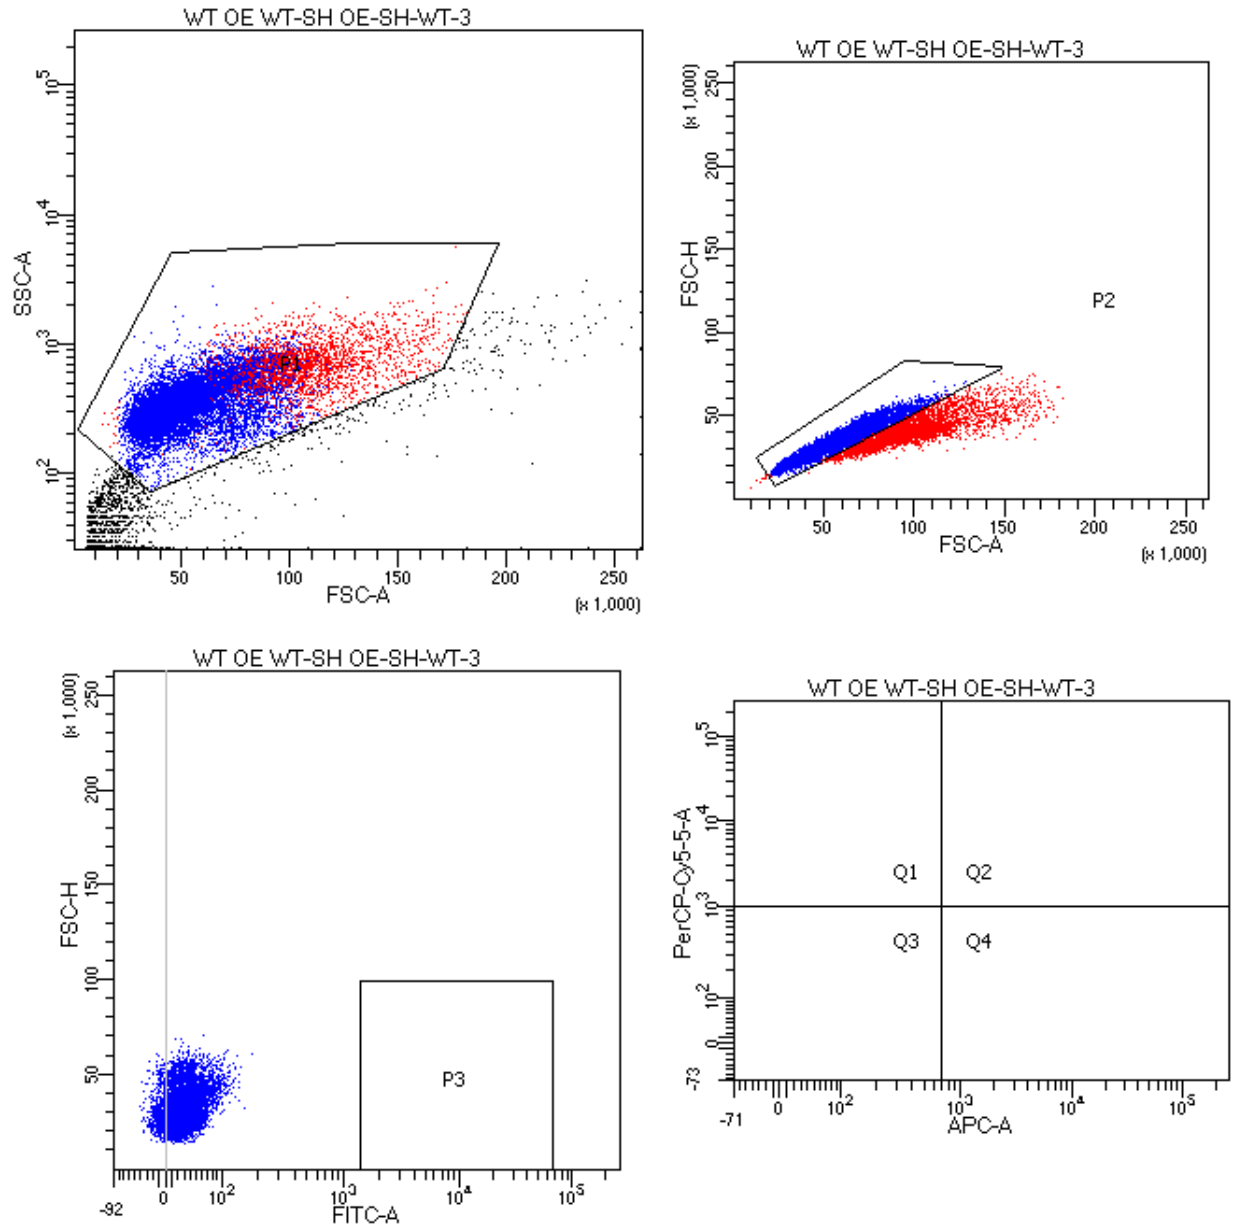

Tube: WT-3

| Population | #Events | %Parent | %Total |
|------------|---------|---------|--------|
| All Events | 15,560  | ####    | 100.0  |
| P1         | 13,598  | 87.4    | 87.4   |
| P2         | 10,000  | 73.5    | 64.3   |
| P3         | 0       | 0.0     | 0.0    |
| Q1         | 0       | ####    | 0.0    |
| Q2         | 0       | ####    | 0.0    |
| Q3         | 0       | ####    | 0.0    |
| Q4         | 0       | ####    | 0.0    |

Supplement: Data_Sheet_6.zip [file Data_Sheet_6.zip]

# BD FACSDiva 8.0.2

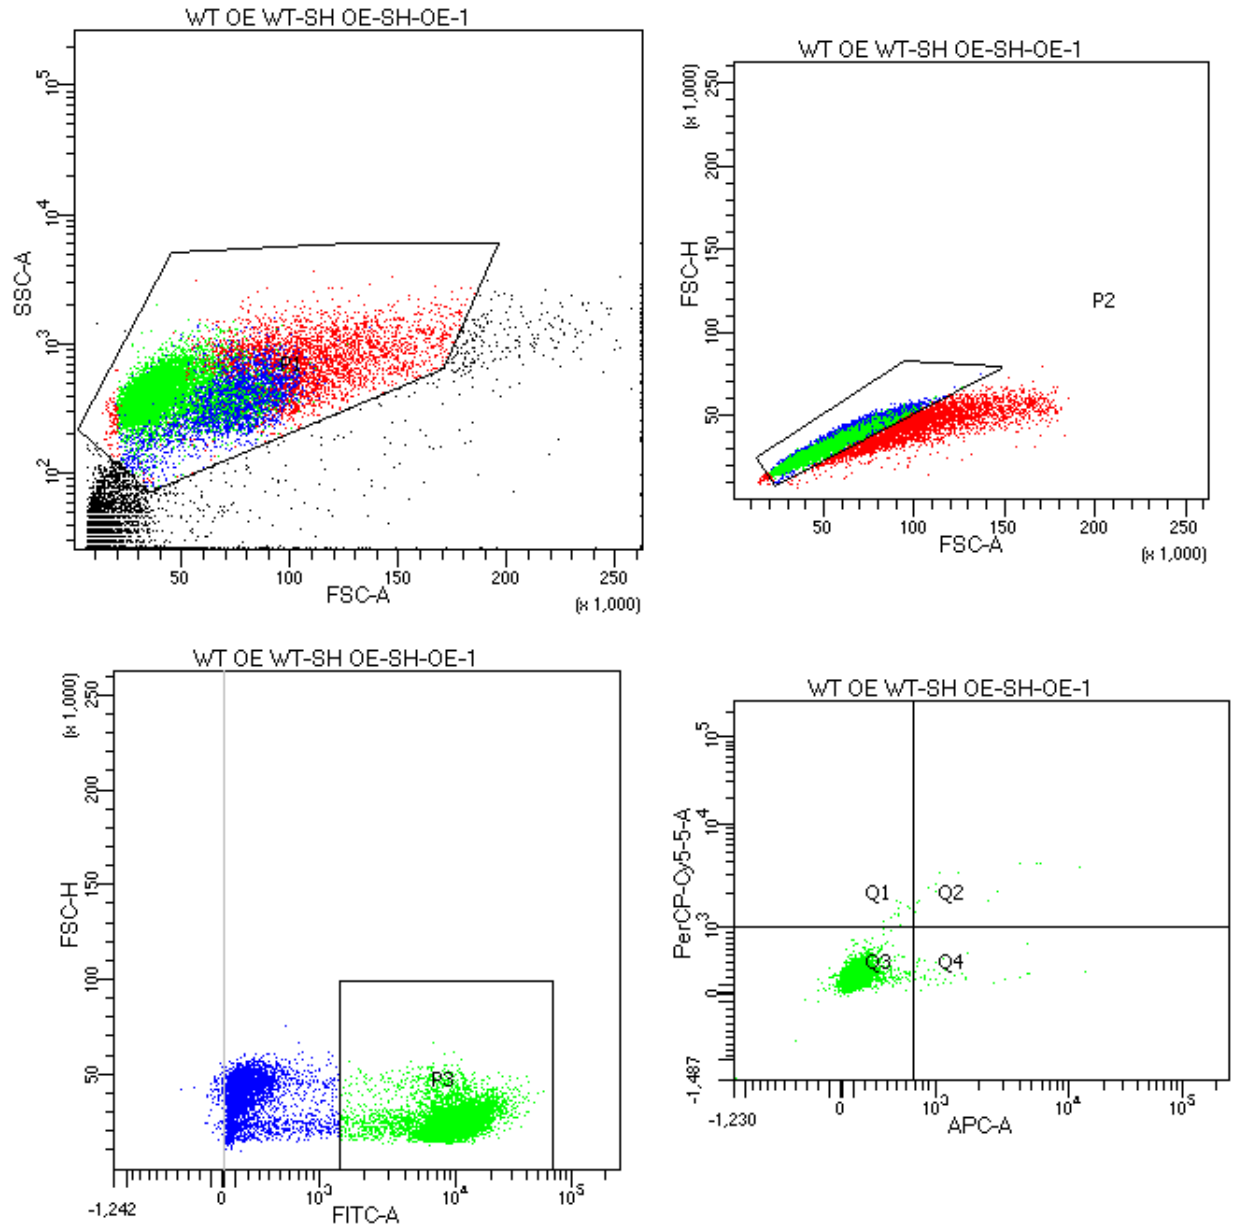

| Tube: OE-1   |         |         |        |
|--------------|---------|---------|--------|
| Population   | #Events | %Parent | %Total |
| ■ All Events | 20,050  | ####    | 100.0  |
| ■ P1         | 13,708  | 68.4    | 68.4   |
| ■ P2         | 10,000  | 73.0    | 49.9   |
| ■ P3         | 5,913   | 59.1    | 29.5   |
| ☒ Q1         | 12      | 0.2     | 0.1    |
| ☒ Q2         | 16      | 0.3     | 0.1    |
| ☒ Q3         | 5,844   | 98.8    | 29.1   |
| ☒ Q4         | 41      | 0.7     | 0.2    |

Supplement: Data_Sheet_6.zip [file Data_Sheet_6.zip]

# BD FACSDiva 8.0.2

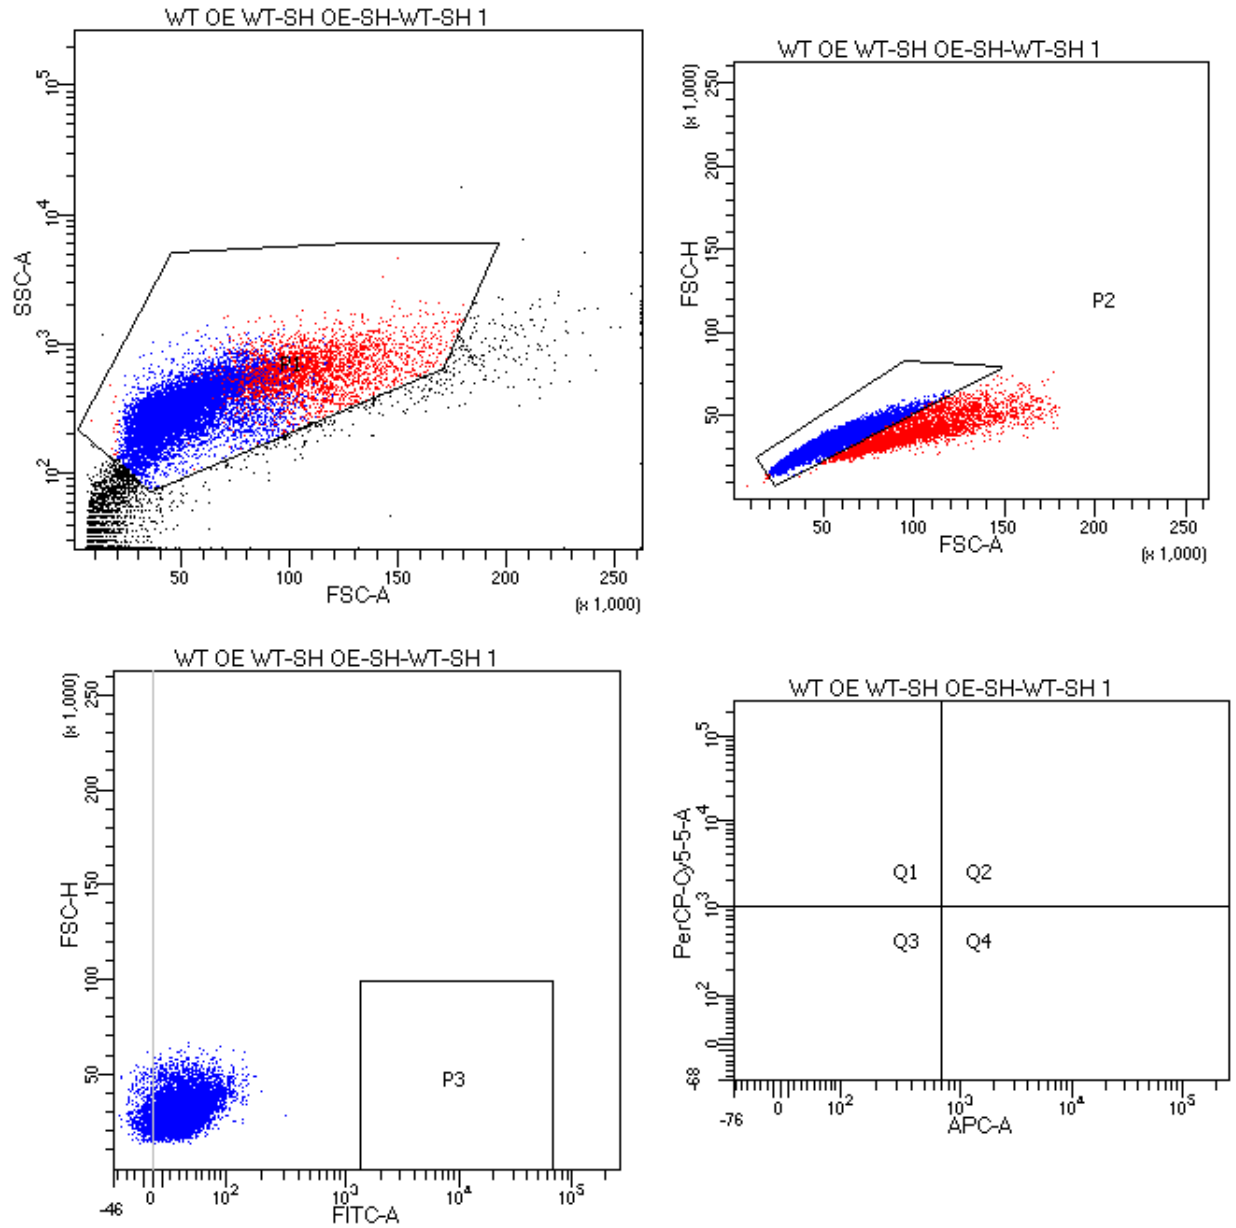

| Tube: WT-SH 1 |         |         |        |
|---------------|---------|---------|--------|
| Population    | #Events | %Parent | %Total |
| ■ All Events  | 16,720  | ####    | 100.0  |
| ■ P1          | 14,241  | 85.2    | 85.2   |
| ■ P2          | 10,000  | 70.2    | 59.8   |
| ■ P3          | 0       | 0.0     | 0.0    |
| □ Q1          | 0       | ####    | 0.0    |
| □ Q2          | 0       | ####    | 0.0    |
| □ Q3          | 0       | ####    | 0.0    |
| □ Q4          | 0       | ####    | 0.0    |

Supplement: Data_Sheet_6.zip [file Data_Sheet_6.zip]

# BD FACSDiva 8.0.2

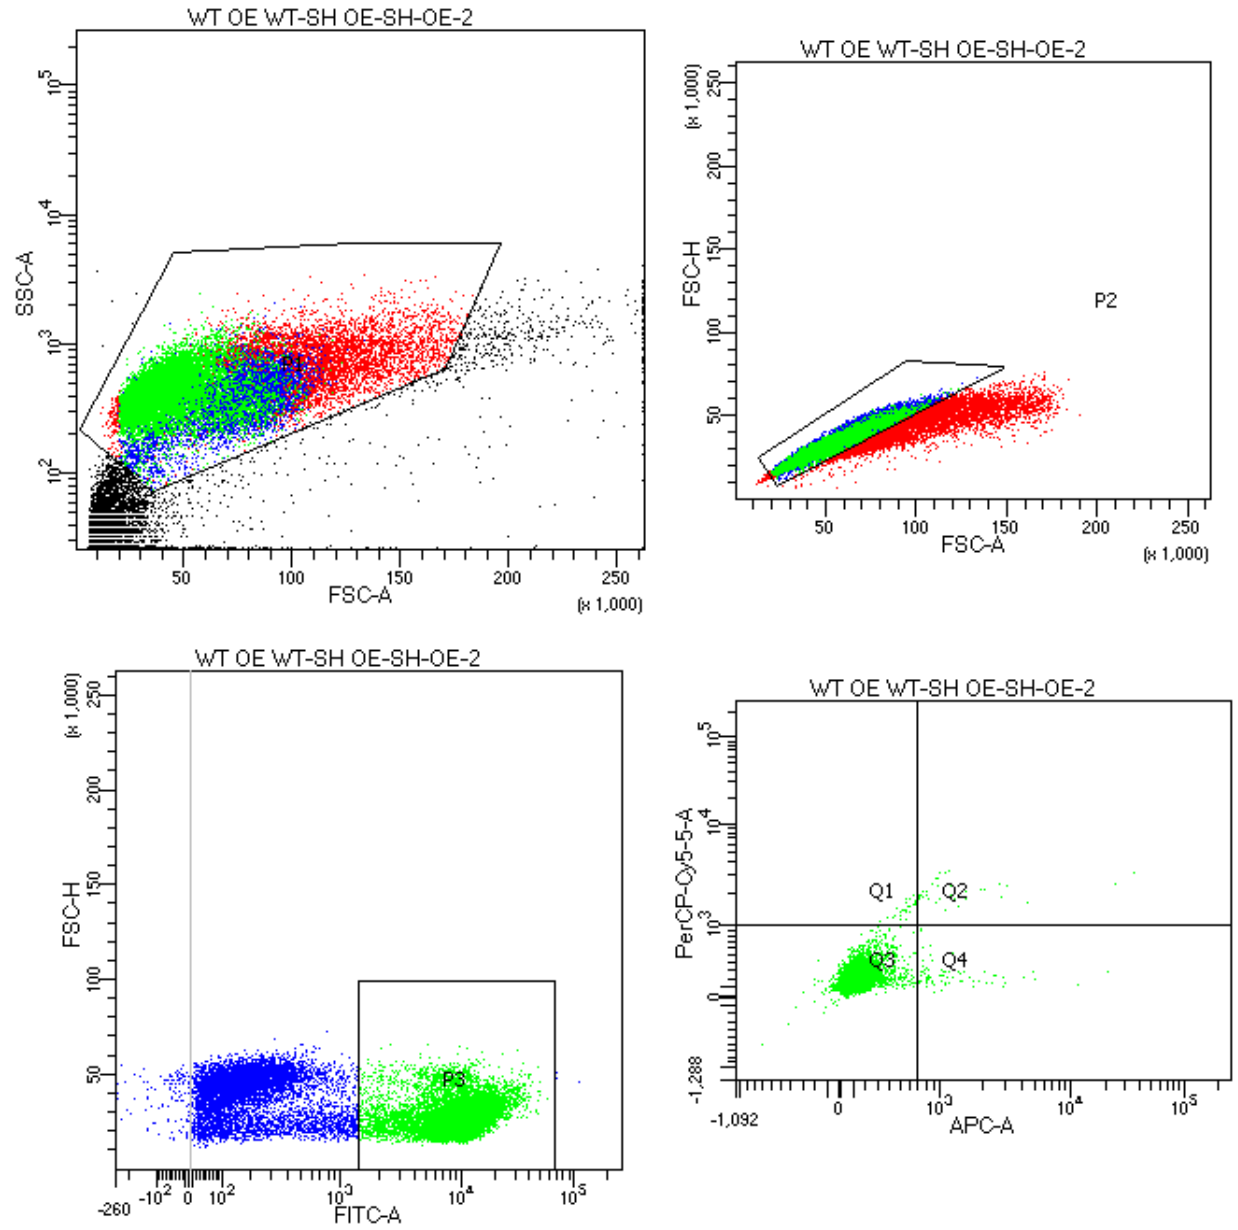

| Tube: OE-2   |         |         |        |
|--------------|---------|---------|--------|
| Population   | #Events | %Parent | %Total |
| ■ All Events | 35,333  | ####    | 100.0  |
| ■ P1         | 25,943  | 73.4    | 73.4   |
| ■ P2         | 20,000  | 77.1    | 56.6   |
| ■ P3         | 12,691  | 63.5    | 35.9   |
| ☒ Q1         | 26      | 0.2     | 0.1    |
| ☒ Q2         | 38      | 0.3     | 0.1    |
| ☒ Q3         | 12,552  | 98.9    | 35.5   |
| ☒ Q4         | 75      | 0.6     | 0.2    |

Supplement: Data_Sheet_6.zip [file Data_Sheet_6.zip]

# BD FACSDiva 8.0.2

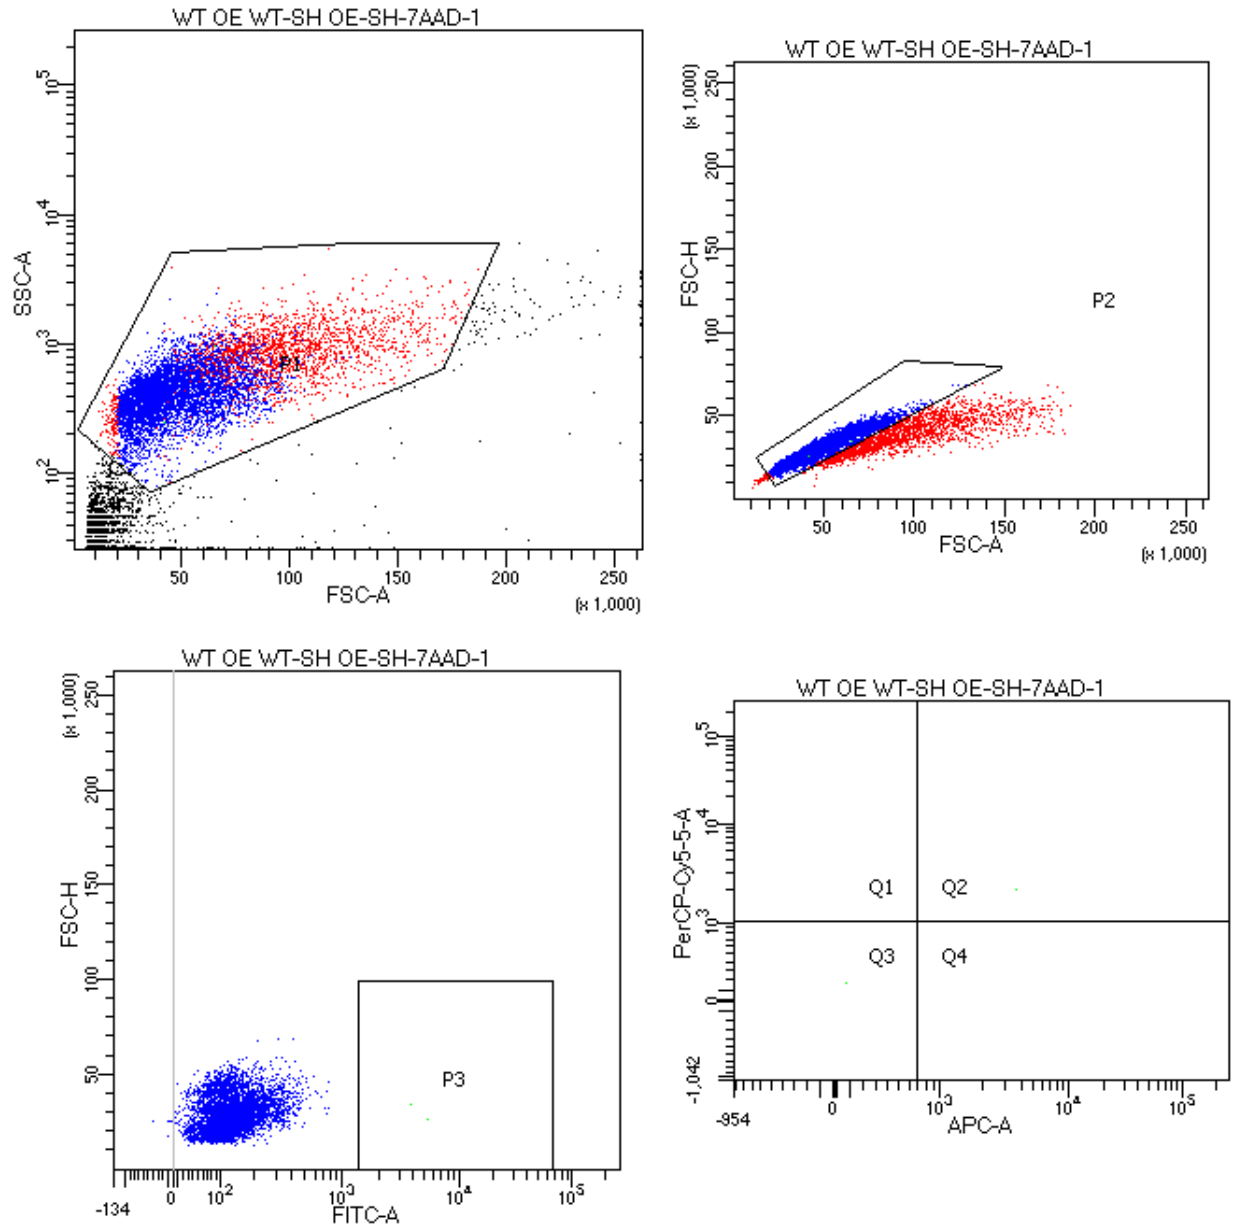

Tube: 7AAD-1

| Population | #Events | %Parent | %Total |
|------------|---------|---------|--------|
| All Events | 10,500  | ####    | 100.0  |
| P1         | 7,959   | 75.8    | 75.8   |
| P2         | 5,672   | 71.3    | 54.0   |
| P3         | 2       | 0.0     | 0.0    |
| Q1         | 0       | 0.0     | 0.0    |
| Q2         | 1       | 50.0    | 0.0    |
| Q3         | 1       | 50.0    | 0.0    |
| Q4         | 0       | 0.0     | 0.0    |

Supplement: Data_Sheet_6.zip [file Data_Sheet_6.zip]

# BD FACSDiva 8.0.2

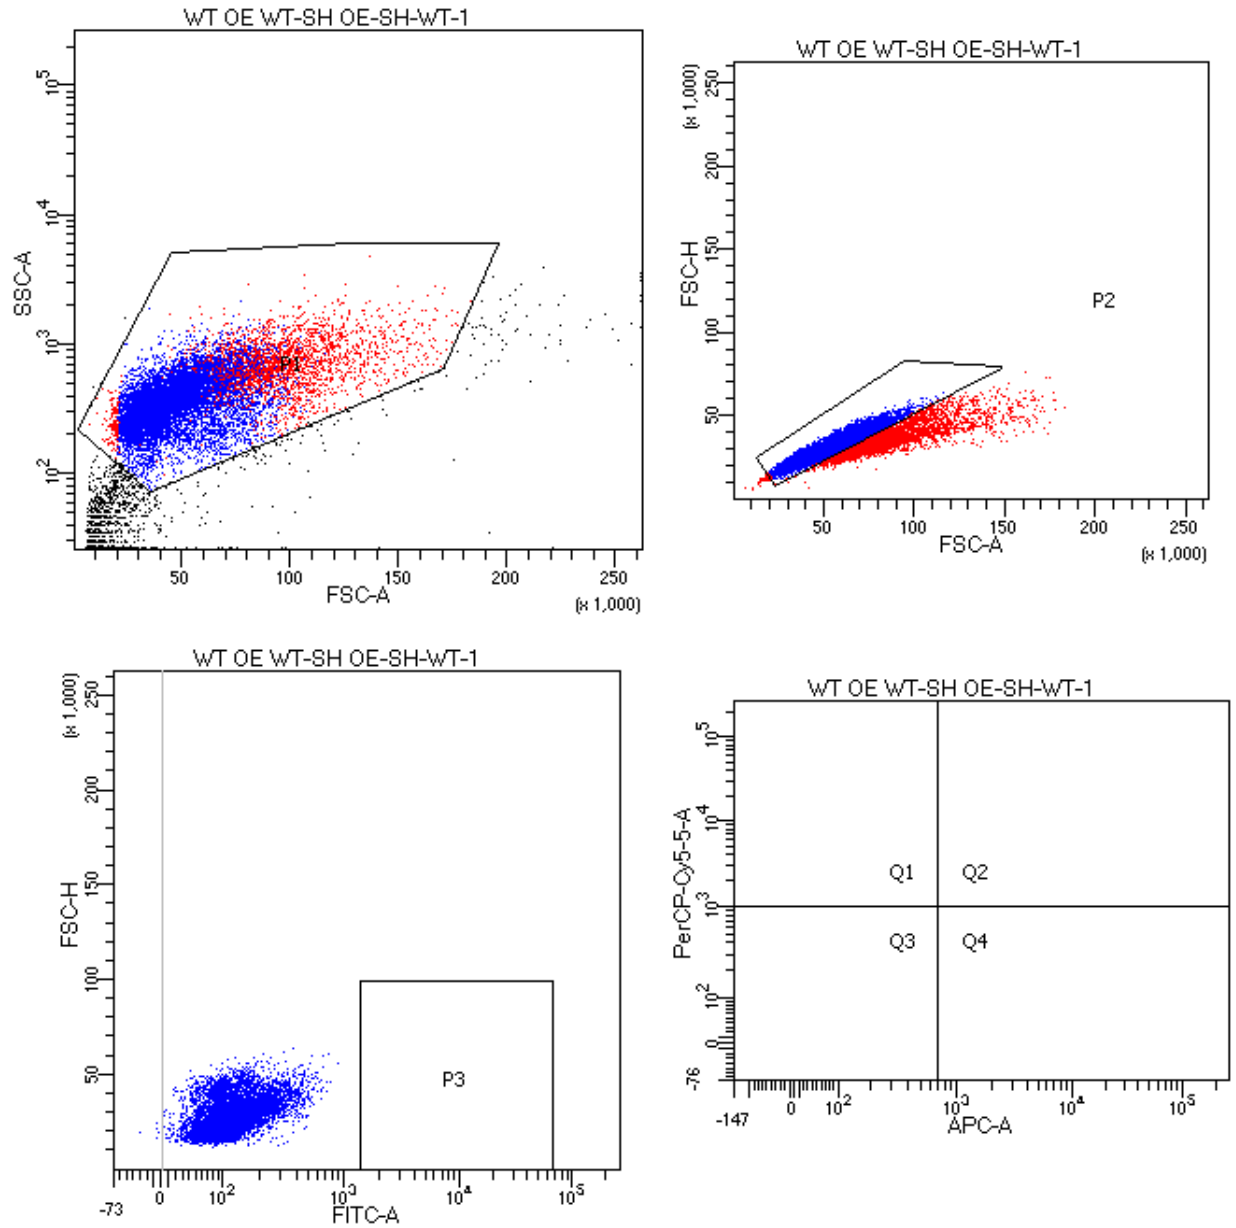

| Tube: WT-1   |         |         |        |
|--------------|---------|---------|--------|
| Population   | #Events | %Parent | %Total |
| ■ All Events | 15,405  | ####    | 100.0  |
| ■ P1         | 13,738  | 89.2    | 89.2   |
| ■ P2         | 10,000  | 72.8    | 64.9   |
| ■ P3         | 0       | 0.0     | 0.0    |
| ☒ Q1         | 0       | ####    | 0.0    |
| ☒ Q2         | 0       | ####    | 0.0    |
| ☒ Q3         | 0       | ####    | 0.0    |
| ☒ Q4         | 0       | ####    | 0.0    |

Supplement: Data_Sheet_6.zip [file Data_Sheet_6.zip]

# BD FACSDiva 8.0.2

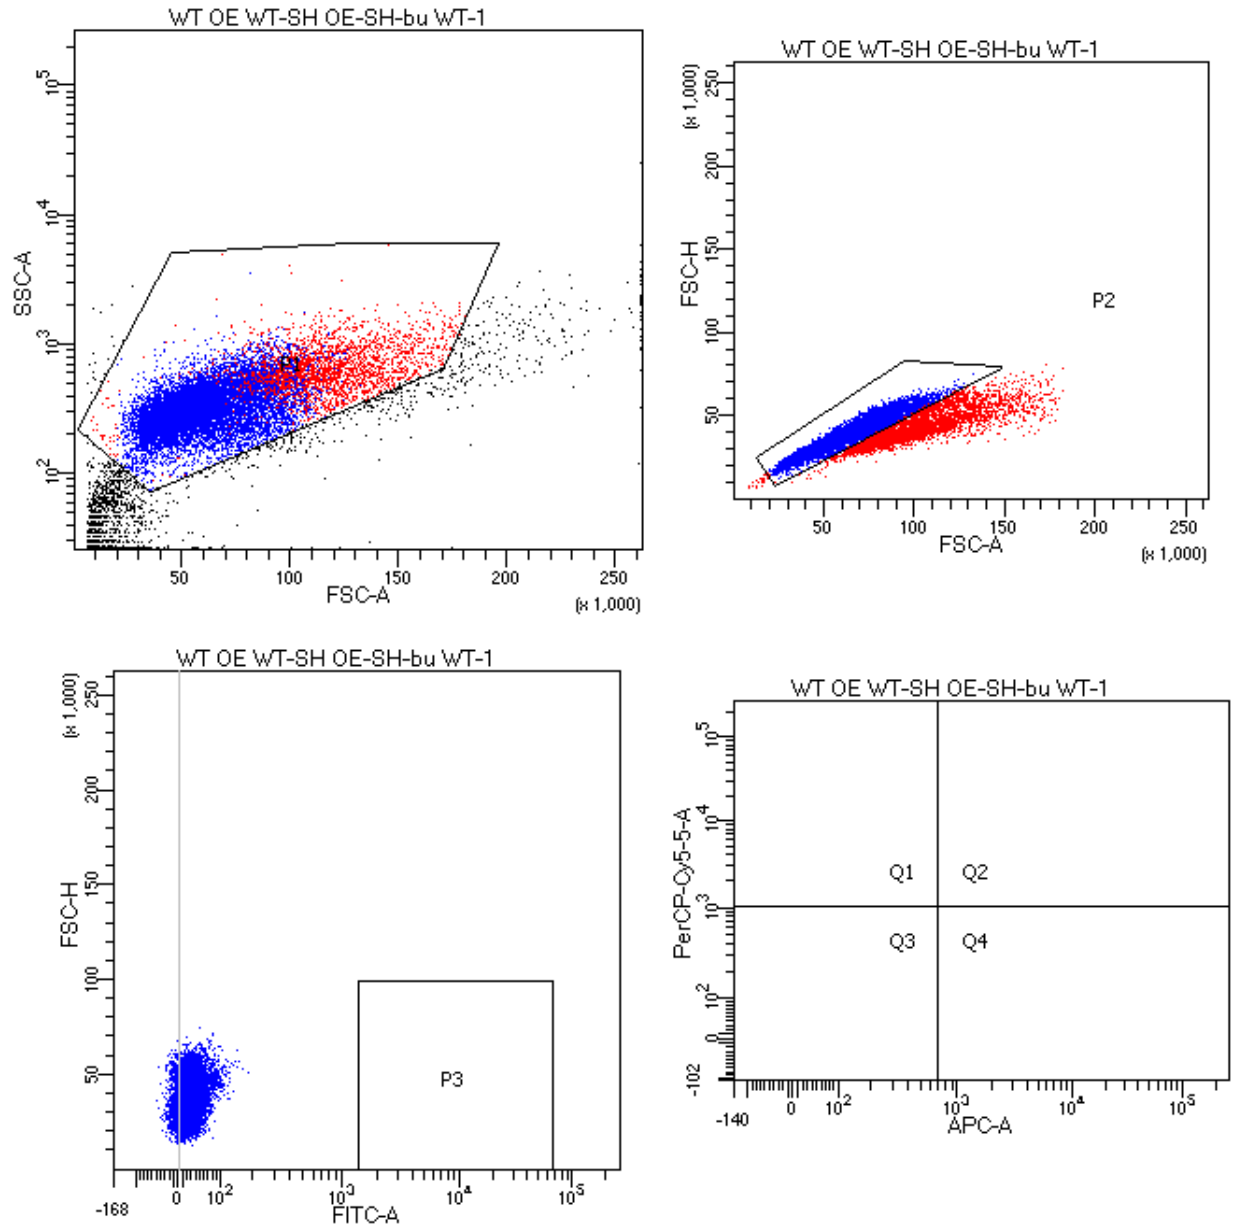

| Tube: bu WT-1 |         |         |        |
|---------------|---------|---------|--------|
| Population    | #Events | %Parent | %Total |
| All Events    | 15,561  | ####    | 100.0  |
| P1            | 13,559  | 87.1    | 87.1   |
| P2            | 10,000  | 73.8    | 64.3   |
| P3            | 0       | 0.0     | 0.0    |
| Q1            | 0       | ####    | 0.0    |
| Q2            | 0       | ####    | 0.0    |
| Q3            | 0       | ####    | 0.0    |
| Q4            | 0       | ####    | 0.0    |

Supplement: Data_Sheet_6.zip [file Data_Sheet_6.zip]

# BD FACSDiva 8.0.2

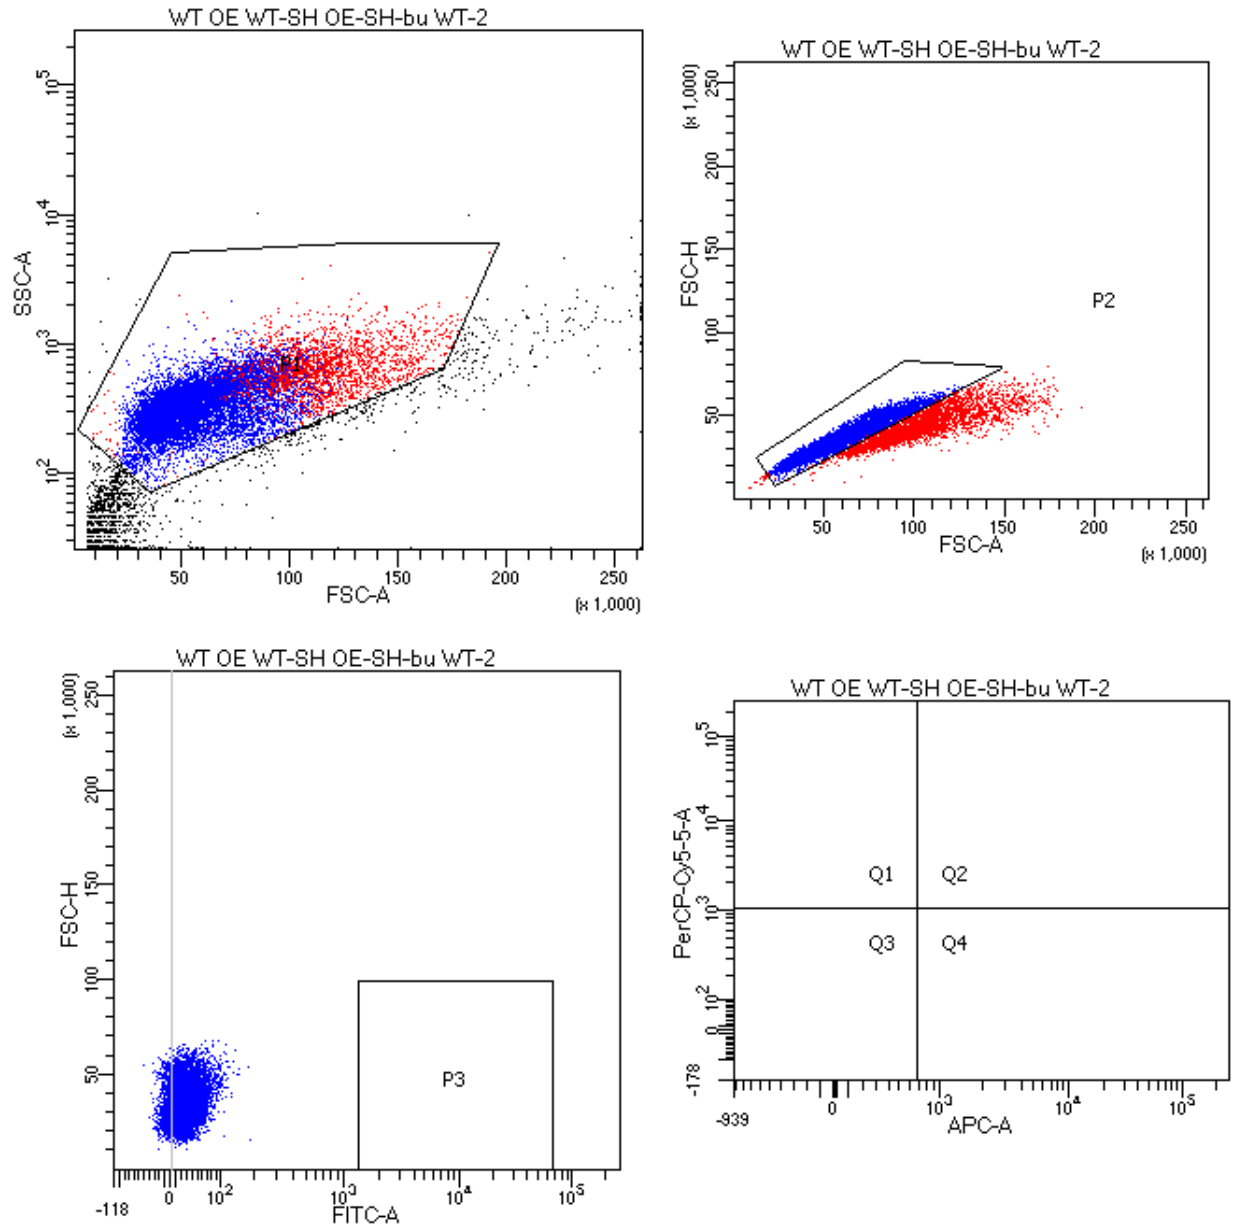

| Tube: bu WT-2 |         |         |        |
|---------------|---------|---------|--------|
| Population    | #Events | %Parent | %Total |
| ■ All Events  | 15,539  | ####    | 100.0  |
| ■ P1          | 13,426  | 86.4    | 86.4   |
| ■ P2          | 10,000  | 74.5    | 64.4   |
| ■ P3          | 0       | 0.0     | 0.0    |
| □ Q1          | 0       | ####    | 0.0    |
| □ Q2          | 0       | ####    | 0.0    |
| □ Q3          | 0       | ####    | 0.0    |
| □ Q4          | 0       | ####    | 0.0    |

Supplement: Data_Sheet_6.zip [file Data_Sheet_6.zip]
